# Supplementary material
Source: PubMed Central journal article supplement (PMC5012511)
Supplement: NIHMS69753-supplement-Appendix.pdf [file NIHMS69753-supplement-Appendix.pdf]

## Appendix to the Global Burden of Dengue: A systematic analysis from the Global Burden of Disease Study 2013

This appendix provides details on the modelling methodology, data used in both the fatal and non-fatal models, and tables of country-level results

### Table of Contents

|                                                                                                |    |
|------------------------------------------------------------------------------------------------|----|
| Appendix A: Methods .....                                                                      | 2  |
| A.1: Model flowchart .....                                                                     | 2  |
| A.2: CODEm model.....                                                                          | 2  |
| A.3: Incidence estimation .....                                                                | 3  |
| A.4: Burden estimation .....                                                                   | 5  |
| Appendix B: Comparison of GBD incidence estimates to incidence observed in vaccine trials..... | 7  |
| Appendix C: Country-Level Estimates .....                                                      | 8  |
| Appendix D: Data sources .....                                                                 | 15 |
| Appendix E: Changes in mortality estimates from GBD 2010 .....                                 | 57 |
| References .....                                                                               | 58 |

## Appendix A: Methods

### A.1: Model flowchart

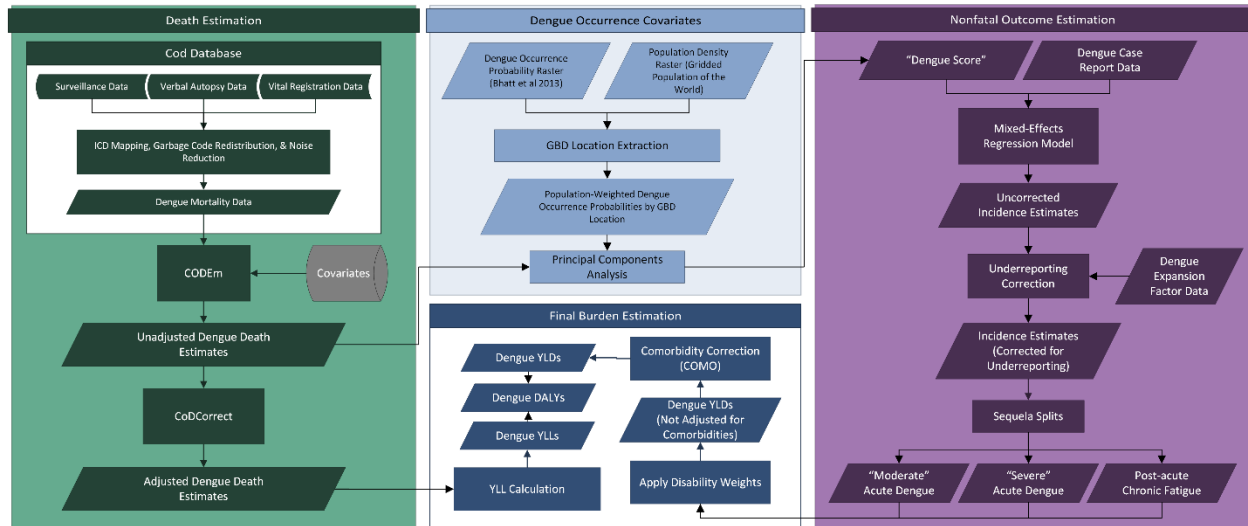

Figure S1: GBD 2013 data and model flow chart

### A.2: CODEm model

We modelled dengue mortality using the Cause-of-Death Ensemble Model (CODEm) tool, which has been described in detail by Foreman et al.<sup>1</sup> Briefly, rather than producing a single model, CODEm produces several submodels using different combinations of covariates (based on potential covariates that are specified by the modeller), different dependent variables (cause fraction or mortality rate), and different model types (linear or spacetime). Each submodel is trained on 70% of the data and its predictions are tested against the remaining 30% to allow for the assessment of out-of-sample predictive performance. The training and holdout sample differ for each submodel. Submodels are ranked based on out-of-sample predictive performance, and a final prediction is made based on a combination of submodels in which the best performers are given greatest weight in the final prediction, moderate performers are given moderate weight, and poor performers are given little or no weight. For each cause, CODEm models are run separately for males and females.

The GBD CoD database contained a total of 167,962 data points for dengue mortality (Figure S1). The database is built from a combination of publically available and restricted data sources. Where our data use agreements allow us to publicly share data, the data used in the model may be interactively explored in the online CoD Visualization tool (<http://vizhub.healthdata.org/cod/>). These data were age, sex, country and year specific. Of these, 9,447 (5.6%) were excluded from the analysis: most exclusions were data points where zero dengue deaths were reported from a small sample in a dengue endemic location. In all cases, data were excluded if they reported an implausible fraction of deaths due to dengue and if they exerted an unduly strong influence on the model. Of the 158,515 included data points, 153,626 (96.9%) were from vital registration, 4,590 (2.9%) were from surveillance sources, and 299 (0.19%) were from verbal autopsy. A roughly equal number of data points existed for males (50.4%) and females (49.6%), and data were roughly evenly divided between age groups.

For dengue, a total 88 submodels were used: 50 submodels for females and 38 submodels for males. These were evenly split between linear and spacetime models, with a slight majority of models using cause fraction as the dependent variable (Table S1). The most successful covariate, based on inclusion in submodels, was the probability of dengue occurrence variable (PrDen). This variable was constructed by overlaying dengue risk maps developed by Bhatt et al<sup>2</sup> and population density maps from the Gridded Population of the World, version 3<sup>3</sup>:

$$PrDen_c = \frac{\sum_{i=1}^n pop_i \times dengue_i}{\sum_{i=1}^n pop_i}$$

where  $PrDen_c$  is the population-weighted probability of dengue transmission in country,  $c$ ,  $pop_i$  is the population in pixel  $i$ , and  $dengue_i$  is the probability of dengue transmission in pixel  $i$ , and  $n$  is the total number of pixels in country  $c$ . This was the only covariate that was used in all included submodels. Health system access — a variable derived through principal components analysis (PCA) of numerous variables including skilled birth attendance, hospital beds per capita and vaccination rates, among others — was the next most successful covariate and was used in 77% of included submodels. Interestingly, the proportion of the population living where the population density exceeds 1,000 people per square-kilometer — a proxy for urbanity, a known risk factor for dengue — was used in none of the included models. This is likely a consequence of the dengue probability variable accounting for urbanicity (Table S2).

**Table S1:** The number of sub-models in which the dependent variable was cause-fraction versus mortality rate, by model type, for each sex.

| Sex     | Model Type | Dependent Variable |      |      |
|---------|------------|--------------------|------|------|
|         |            | Cause Fraction     | Rate | Both |
| Females | Linear     | 13                 | 12   | 25   |
|         | Spacetime  | 13                 | 12   | 25   |
|         | Both       | 26                 | 24   | 50   |
| Males   | Linear     | 11                 | 8    | 19   |
|         | Spacetime  | 11                 | 8    | 19   |
|         | Both       | 22                 | 16   | 38   |

**Table S2:** The number (and percent) of sub-models in which each covariate was used, among those models that were included in the final ensemble.

| Covariate                                                                                                  | Sex           |               |
|------------------------------------------------------------------------------------------------------------|---------------|---------------|
|                                                                                                            | Female        | Male          |
| Probability of dengue occurrence                                                                           | 50<br>(100.0) | 38<br>(100.0) |
| Dengue anomalies (annual deviations in dengue case reports, by country, in standard deviations)            | 20<br>(40.0)  | 16<br>(42.1)  |
| Health system access                                                                                       | 40<br>(80.0)  | 28<br>(73.7)  |
| Proportion of the population living between -15 and 15° latitude                                           | 20<br>(40.0)  | 12<br>(31.6)  |
| Education (years per capita)                                                                               | 20<br>(40.0)  | 14<br>(36.8)  |
| Log lag distributed income (LDI) per capita                                                                | 20<br>(40.0)  | 18<br>(47.4)  |
| Population living under 100 meters elevation (proportion)                                                  | 0<br>(0.0)    | 8<br>(21.1)   |
| Proportion of the population living where rainfall is in the 4th quintile                                  | 0<br>(0.0)    | 0<br>(0.0)    |
| Proportion of the population living where rainfall is in the 5th quintile                                  | 20<br>(40.0)  | 16<br>(42.1)  |
| Proportion of the population living where the population density exceeds 1,000 people per square-kilometer | 0<br>(0.0)    | 0<br>(0.0)    |
| Dengue outbreaks (binary indicator)                                                                        | 20<br>(40.0)  | 12<br>(31.6)  |

### A.3: Incidence estimation

We attempted to correct for underreporting using a three-phase modelling approach: first, we defined the expected spatial distribution of disease; second, we modelled the association between this expected distribution and reported

incidence with the assumption that deviations from the expected distribution reflect deviations in completeness of reporting; and, third, we calibrated the model by benchmarking these deviations against published empirical expansion factors.

We had two potential sources to inform our expected distribution of cases, each with its own strengths and limitations. First, estimated mortality rates are linked to empirical mortality data and exist as a complete time series, but may suffer from non-uniform underreporting. Second, cartographic-based estimates of dengue transmission probability are free from problems of underreporting and are theoretically robust, but do not offer a time-series and may be considered disconnected from empirical data. Moreover, the collinearity of these two variables, mortality rates and dengue transmission probability, prevented us from including both in the model. To capture information from both sources while avoiding collinearity, we performed a principal components analysis of these two variables and created a dengue score variable from the first component.

We developed a mixed-effects negative binomial model with the expected number of reported cases in each country,  $i$ , and year,  $t$ , as the dependent variable, number in the population ( $pop$ ) as the exposure or offset variable, fixed effects on dengue score ( $score$ ), year ( $t$ ), binary income category (high income, including countries classified by the World Bank as “high income, OECD” and “high income, non-OECD”, vs low/middle income, including countries classified as “low-income”, “lower-middle income” and “upper-middle income”)<sup>4</sup> ( $income$ ), and an interaction between year and income category, and random effects on location ( $\alpha$ ):

$$E(\ln(\text{reported}_{it})) = \beta_0 + \beta_1 \text{score}_{it} + \beta_2 t + \beta_3 \text{income}_i + \beta_4 t \times \text{income}_i + \alpha_i + \ln(\text{pop}_{it})$$

For simplicity, we rewrite this model as

$$E(\ln(\text{reported}_{it})) = X\beta + \alpha_i + \ln(\text{pop}_{it})$$

The fixed effects portion of this model,  $X\beta$ , therefore, captures the expected reported incidence in a given location and year, assuming that completeness of reporting in all locations and years is equal to the global mean level of completeness. And,  $\alpha_i$ , therefore, captures the degree to which a country’s reporting deviates from the global mean level of completeness.

We are then able to make post-regression corrections for underreporting based on the random effect from the model and published expansion factor data. Expansion factors represent the ratio of true apparent infections to reported infections for a given country:

$$EF_i = \frac{\text{actual}_i}{\text{reported}_i}$$

or, alternatively,

$$\text{actual}_i = EF_i \times \text{reported}_i$$

With that, we can see that the expected actual number of cases may be represented as,

$$\ln(\text{actual}_{it}) = \ln(\text{pop}_{it}) + X\beta + \alpha_i + \ln(EF_i)$$

Expansion factor data are limited, leaving  $\ln(EF_i)$  unknown for most countries. However, by pooling expansion factor data across countries, we may estimate a global expansion factor. And, since  $\alpha_i$  captures deviations in reporting from the global mean, we may then also derive the true number of cases as,

$$\ln(\text{actual}_{it}) = \ln(\text{pop}_{it}) + X\beta + \overline{\ln(EF)}$$

where,  $\overline{\ln(EF)}$  is the global mean log expansion factor:

$$\overline{\ln(EF)} = \frac{\sum_{i=1}^{n_i} \alpha_i + \ln(EF_i)}{n_i}$$

where  $n_i$  is the number of countries. From this we see that, for any given country,

$$\overline{\ln(EF)} = \alpha_i + \ln(EF_i)$$

Or, alternatively,

$$\ln(EF_i) = \overline{\ln(EF)} - \alpha_i$$

We conducted a literature review for studies that reported expansion factors or reporting rates (the inverse of an expansion factor). For each study,  $s$ , we calculated an estimate of  $\overline{\ln(EF_s)}$  as the sum of log of the reported expansion factor,  $\ln(EF_{s[i]})$ , and the model-based random effect for the corresponding country and year,  $\alpha_i$ . Where a study covered a range of years, we used the midpoint.

$$\overline{\ln(EF_s)} = \alpha_i + \ln(EF_{s[i]})$$

We then estimated  $\overline{\ln(EF)}$  as the mean value of each study-specific estimate,

$$\overline{\ln(EF)} \approx \frac{\sum_{s=1}^{n_s} \overline{\ln(EF_s)}}{n_s}$$

where  $n_s$  is the number of expansion factor studies. This allowed us to pool information about expansion factors across studies and estimate a global mean that could be applied to all countries.

We estimated the log-incidence rate (IR) in each country and year, then, as the sum of the fixed effects and log-global expansion factor:

$$\ln(\widehat{IR}_{it}) = X\hat{\beta} + \overline{\ln(EF)}$$

We propagated uncertainty from both our fixed effects and our estimate of  $\overline{EF}$  into our final estimates using posterior simulation: we created 1,000 draws of each incidence rate estimate, where each draw was the sum of a draw from the distribution of fixed effects and a draw from the distribution of global expansion factors, using a log-normal distribution with the standard deviation  $\overline{\ln(EF_s)}$ , under the assumption of exchangeability, by the observed between-study standard deviation in estimates of  $\overline{\ln(EF_s)}$ . For each country-year, the mean draw was taken as the point estimate, and the 2.5<sup>th</sup> and 97.5<sup>th</sup> percentile draws were taken as the bounds of the 95% uncertainty interval.

We had a total of 1,636 country-years of dengue case reports from 76 countries and 34 subnational divisions, between 1988 and 2013 (Figure S2). We found published expansion factor estimates for 14 countries: nine from the Southeast Asia region,<sup>5-11</sup> two from high-income Asia Pacific,<sup>10</sup> two from Central Latin America,<sup>12,13</sup> and one from South Asia.<sup>10</sup>

The case reports used in the analysis do not disaggregate cases by age and sex. We therefore modelled total cases by country and year and then distributed cases to age-sex groups based on the age-sex distribution of dengue cases captured by the Hospital Information System of the Brazilian Unified National Health System (SIH-SUS).<sup>14</sup>

#### A.4: Burden estimation

We estimated three burden metrics: years of life lost to premature mortality (YLL), years lived with disability (YLD) and disability adjusted life years (DALY). YLLs were estimated as the difference between the age of death

and the corresponding life expectancy goal for those surviving to that age of death; here, the life-expectancy goal is based on a theoretical composite life table in which the target life-expectancy for each age is equal to the longest observed life-expectancy among people of that age in any country.<sup>15</sup> YLDs were calculated as the product of the number of cases having a given health state, the duration of that health state, and the disability weight for that health state. DALYs were calculated as the sum of YLLs and YLDs. GBD studies conducted prior to 2010 applied a discount rate to burden estimates; however, discounting has not been applied in recent GBD studies and, as such, we used no discounting in our burden estimation. To estimate years lived with disability (YLD), we assigned a health state and corresponding disability weight to each case. GBD 2013 uses 235 health states, each having a disability weight based on pooled results from the GBD 2010 Disability Weights Measurement study<sup>16</sup> and the more recent European disability weights study.<sup>17</sup> We assigned each dengue case to one of two acute health states: 94·5% of cases were assigned the disability weight for “infectious disease, acute episode, moderate” (0·051 [0·032 – 0·074]) with a mean duration of 6 days; and 5·5% were assigned the disability weight for “infectious disease, acute episode, severe” (0·133 [0·088 – 0·190]) with a mean duration of 14 days.<sup>18</sup> We derived the proportions for the split between moderate and severe states based on a meta-analysis of the subset of case notification data that presented both the total number of cases, and the number of severe cases (defined as either dengue hemorrhagic fever or dengue shock syndrome). Additionally, 8·5% of cases were assumed to experience post-dengue chronic fatigue, and assigned the disability weight for “Infectious disease, post-acute consequences (0·219 [0·148 – 0·308]), with a mean duration of six-months.<sup>19</sup> Finally, we account for comorbidities through a micro-simulation in which each sequela modelled in GBD 2013 is probabilistically assigned to a population of simulated individuals. Within individuals who are assigned more than one sequela, their total disability is calculated as one minus the product of one minus the disability weight for each sequela assigned to that individual. This ensures that no set of comorbidities results in a combined disability weight greater than one.<sup>20</sup>

## Appendix B: Comparison of GBD incidence estimates to incidence observed in vaccine trials

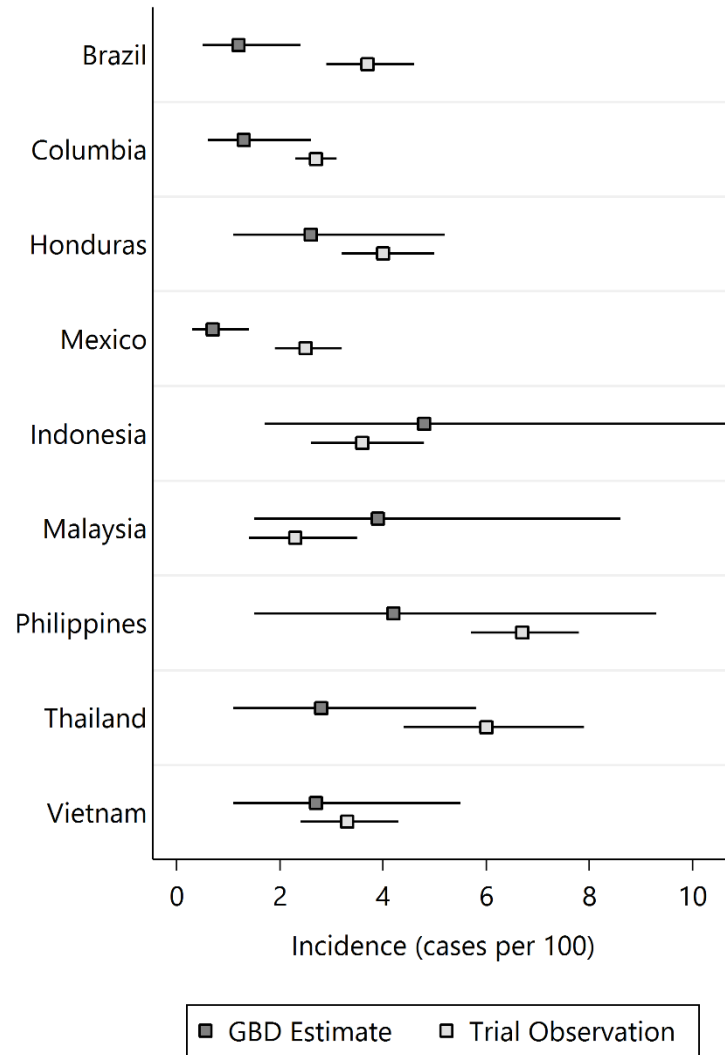

**Figure S2:** Comparison of GBD dengue incidence estimates to incidence observed in the control arms of two recent dengue vaccine trials, showing point estimates and 95% uncertainty intervals. Observed incidence in Latin American countries were among children ages 9 to 16, from 2011 through 2013,<sup>21</sup> and are compared here to GBD estimates among children ages 10 through 14 in 2013. Observed incidence in Southeast Asian countries were among children ages 2 to 14 years, in 2011 and 2012,<sup>22</sup> and are compared here to GBD estimates among children ages 1 to 14 years in 2013.

## Appendix C: Country-Level Estimates

| <b>Table S3: Dengue cases and deaths (and 95% uncertainty intervals) by country, for 2013</b> |                            |                                                 |                      |                                     |
|-----------------------------------------------------------------------------------------------|----------------------------|-------------------------------------------------|----------------------|-------------------------------------|
| <b>Country</b>                                                                                | <b>Cases (thousands)</b>   | <b>Age-standardized incidence (per 100,000)</b> | <b>Deaths</b>        | <b>Mortality rate (per 100,000)</b> |
| Afghanistan                                                                                   | 104.5 (33.6, 243.6)        | 332.4 (107.0, 774.9)                            | 13.1 (5.4, 18.9)     | 0.043 (0.019, 0.064)                |
| Albania                                                                                       | 0.0 (0.0, 0.0)             | 0.0 (0.0, 0.0)                                  | 0.3 (0.2, 0.5)       | 0.010 (0.008, 0.015)                |
| Algeria                                                                                       | 0.0 (0.0, 0.0)             | 0.0 (0.0, 0.0)                                  | 3.9 (3.2, 5.4)       | 0.010 (0.009, 0.014)                |
| Andorra                                                                                       | 0.0 (0.0, 0.0)             | 0.0 (0.0, 0.0)                                  | 0.0 (0.0, 0.0)       | 0.007 (0.005, 0.010)                |
| Angola                                                                                        | 96.7 (34.6, 216.7)         | 440.4 (157.4, 986.3)                            | 11.4 (7.0, 19.1)     | 0.039 (0.025, 0.063)                |
| Antigua and Barbuda                                                                           | 0.7 (0.1, 2.3)             | 689.9 (115.3, 2,272.1)                          | 0.2 (0.1, 0.3)       | 0.223 (0.160, 0.298)                |
| Argentina                                                                                     | 151.2 (50.3, 351.6)        | 364.2 (121.1, 846.9)                            | 17.6 (14.3, 27.1)    | 0.043 (0.034, 0.065)                |
| Armenia                                                                                       | 0.0 (0.0, 0.0)             | 0.0 (0.0, 0.0)                                  | 0.3 (0.3, 0.4)       | 0.011 (0.009, 0.014)                |
| Australia                                                                                     | 4.3 (0.5, 15.5)            | 18.1 (2.3, 65.9)                                | 2.3 (1.5, 2.6)       | 0.010 (0.006, 0.011)                |
| Austria                                                                                       | 0.0 (0.0, 0.0)             | 0.0 (0.0, 0.0)                                  | 0.8 (0.5, 0.9)       | 0.009 (0.006, 0.011)                |
| Azerbaijan                                                                                    | 0.0 (0.0, 0.0)             | 0.0 (0.0, 0.0)                                  | 1.0 (0.8, 1.5)       | 0.010 (0.008, 0.016)                |
| Bahrain                                                                                       | 0.0 (0.0, 0.0)             | 0.0 (0.0, 0.0)                                  | 0.1 (0.1, 0.2)       | 0.011 (0.009, 0.014)                |
| Bangladesh                                                                                    | 2,497.4 (1,089.0, 4,972.4) | 1,578.1 (688.1, 3,142.0)                        | 261.6 (143.1, 374.4) | 0.223 (0.121, 0.312)                |
| Barbados                                                                                      | 2.2 (0.4, 7.1)             | 671.7 (113.5, 2,206.8)                          | 0.5 (0.4, 0.7)       | 0.177 (0.133, 0.231)                |
| Belarus                                                                                       | 0.0 (0.0, 0.0)             | 0.0 (0.0, 0.0)                                  | 1.0 (0.8, 1.5)       | 0.010 (0.008, 0.014)                |
| Belgium                                                                                       | 0.0 (0.0, 0.0)             | 0.0 (0.0, 0.0)                                  | 1.1 (0.9, 1.4)       | 0.010 (0.008, 0.012)                |
| Belize                                                                                        | 6.5 (2.8, 13.0)            | 1,718.6 (742.9, 3,434.1)                        | 0.9 (0.7, 1.2)       | 0.331 (0.243, 0.412)                |
| Benin                                                                                         | 114.3 (49.7, 227.8)        | 1,089.9 (474.0, 2,172.4)                        | 6.1 (3.5, 10.1)      | 0.058 (0.035, 0.108)                |
| Bhutan                                                                                        | 2.9 (1.0, 6.7)             | 385.6 (131.4, 885.2)                            | 0.5 (0.3, 0.8)       | 0.077 (0.050, 0.126)                |
| Bolivia                                                                                       | 33.4 (10.3, 79.9)          | 308.2 (94.7, 737.9)                             | 1.9 (1.3, 4.3)       | 0.022 (0.015, 0.049)                |
| Bosnia and Herzegovina                                                                        | 0.0 (0.0, 0.0)             | 0.0 (0.0, 0.0)                                  | 0.5 (0.4, 1.1)       | 0.013 (0.011, 0.027)                |
| Botswana                                                                                      | 0.0 (0.0, 0.0)             | 0.0 (0.0, 0.0)                                  | 0.1 (0.1, 0.2)       | 0.007 (0.005, 0.010)                |
| Brazil                                                                                        | 1,907.9 (818.5, 3,843.6)   | 951.7 (408.3, 1,917.2)                          | 255.6 (33.6, 316.7)  | 0.141 (0.017, 0.177)                |
| Brunei                                                                                        | 1.2 (0.2, 3.6)             | 286.3 (57.4, 871.6)                             | 0.1 (0.1, 0.2)       | 0.025 (0.018, 0.059)                |
| Bulgaria                                                                                      | 0.0 (0.0, 0.0)             | 0.0 (0.0, 0.0)                                  | 1.1 (0.9, 1.5)       | 0.014 (0.012, 0.019)                |
| Burkina Faso                                                                                  | 95.4 (36.5, 204.7)         | 553.7 (212.1, 1,188.6)                          | 9.2 (5.9, 13.4)      | 0.042 (0.027, 0.068)                |
| Burundi                                                                                       | 31.2 (9.5, 75.3)           | 302.9 (92.0, 729.9)                             | 2.0 (1.2, 2.6)       | 0.026 (0.011, 0.037)                |
| Cambodia                                                                                      | 418.3 (168.1, 869.6)       | 2,727.9 (1,096.3, 5,670.9)                      | 112.4 (67.2, 145.9)  | 0.661 (0.413, 0.837)                |
| Cameroon                                                                                      | 183.5 (77.8, 373.8)        | 809.5 (343.4, 1,649.0)                          | 19.1 (12.0, 29.0)    | 0.069 (0.048, 0.098)                |
| Canada                                                                                        | 0.0 (0.0, 0.0)             | 0.0 (0.0, 0.0)                                  | 3.4 (2.4, 3.9)       | 0.010 (0.007, 0.011)                |
| Cape Verde                                                                                    | 1.8 (0.6, 4.2)             | 359.7 (119.5, 836.4)                            | 0.1 (0.1, 0.2)       | 0.021 (0.011, 0.047)                |
| Central African Republic                                                                      | 25.4 (9.6, 54.7)           | 540.1 (205.3, 1,163.8)                          | 2.5 (1.4, 3.9)       | 0.047 (0.029, 0.068)                |
| Chad                                                                                          | 52.6 (18.3, 119.6)         | 402.7 (139.8, 915.2)                            | 6.3 (3.7, 9.8)       | 0.035 (0.024, 0.051)                |
| Chile                                                                                         | 0.0 (0.0, 0.0)             | 0.0 (0.0, 0.0)                                  | 2.2 (1.6, 5.4)       | 0.013 (0.009, 0.031)                |
| China                                                                                         | 1,076.4 (356.3, 2,498.6)   | 79.6 (26.4, 184.8)                              | 135.8 (112.3, 158.0) | 0.010 (0.008, 0.011)                |
| Colombia                                                                                      | 510.1 (220.7, 1,018.8)     | 1,054.3 (456.3, 2,105.8)                        | 90.0 (23.3, 115.1)   | 0.206 (0.053, 0.263)                |
| Comoros                                                                                       | 3.9 (1.4, 8.4)             | 518.5 (192.9, 1,126.5)                          | 0.2 (0.1, 0.4)       | 0.042 (0.015, 0.068)                |
| Congo                                                                                         | 21.8 (8.0, 48.0)           | 484.8 (177.7, 1,065.9)                          | 1.8 (1.2, 2.8)       | 0.039 (0.026, 0.059)                |
| Costa Rica                                                                                    | 46.5 (20.0, 93.7)          | 955.7 (410.1, 1,924.4)                          | 1.3 (1.1, 2.5)       | 0.028 (0.023, 0.056)                |
| Cote d'Ivoire                                                                                 | 311.1 (136.0, 618.6)       | 1,508.8 (659.8, 3,000.4)                        | 22.2 (14.5, 30.5)    | 0.097 (0.065, 0.136)                |
| Croatia                                                                                       | 0.0 (0.0, 0.0)             | 0.0 (0.0, 0.0)                                  | 0.4 (0.3, 0.5)       | 0.009 (0.007, 0.011)                |
| Cuba                                                                                          | 243.7 (104.7, 489.3)       | 1,902.8 (817.6, 3,821.3)                        | 8.4 (6.7, 12.1)      | 0.076 (0.059, 0.112)                |
| Cyprus                                                                                        | 0.0 (0.0, 0.0)             | 0.0 (0.0, 0.0)                                  | 0.1 (0.1, 0.1)       | 0.012 (0.009, 0.014)                |
| Czech Republic                                                                                | 0.0 (0.0, 0.0)             | 0.0 (0.0, 0.0)                                  | 1.0 (0.7, 1.1)       | 0.009 (0.006, 0.011)                |
| Democratic Republic of the Congo                                                              | 354.2 (131.7, 770.2)       | 514.7 (191.4, 1,119.2)                          | 44.3 (24.9, 68.7)    | 0.050 (0.030, 0.082)                |
| Denmark                                                                                       | 0.0 (0.0, 0.0)             | 0.0 (0.0, 0.0)                                  | 0.6 (0.4, 0.6)       | 0.010 (0.007, 0.011)                |
| Djibouti                                                                                      | 1.6 (0.4, 4.7)             | 185.3 (44.0, 532.0)                             | 0.2 (0.1, 0.3)       | 0.023 (0.012, 0.036)                |
| Dominica                                                                                      | 2.3 (0.9, 4.8)             | 2,850.6 (1,135.3, 5,958.1)                      | 0.1 (0.1, 0.2)       | 0.213 (0.153, 0.293)                |
| Dominican Republic                                                                            | 310.4 (126.3, 642.5)       | 2,612.1 (1,063.0, 5,406.1)                      | 83.7 (20.4, 115.5)   | 0.809 (0.200, 1.101)                |
| Ecuador                                                                                       | 163.5 (70.6, 326.7)        | 1,032.5 (446.0, 2,063.8)                        | 23.4 (15.2, 28.6)    | 0.153 (0.099, 0.190)                |
| Egypt                                                                                         | 412.1 (151.9, 902.1)       | 499.6 (184.1, 1,093.6)                          | 8.4 (7.0, 13.0)      | 0.010 (0.009, 0.016)                |
| El Salvador                                                                                   | 141.6 (60.1, 288.4)        | 2,197.0 (931.9, 4,475.4)                        | 3.8 (3.0, 6.3)       | 0.061 (0.048, 0.102)                |
| Equatorial Guinea                                                                             | 1.6 (0.3, 4.9)             | 210.9 (43.4, 635.9)                             | 0.8 (0.4, 1.5)       | 0.087 (0.051, 0.157)                |
| Eritrea                                                                                       | 10.5 (2.3, 30.9)           | 164.7 (36.4, 483.1)                             | 0.9 (0.4, 1.4)       | 0.019 (0.007, 0.031)                |
| Estonia                                                                                       | 0.0 (0.0, 0.0)             | 0.0 (0.0, 0.0)                                  | 0.1 (0.1, 0.1)       | 0.009 (0.005, 0.011)                |
| Ethiopia                                                                                      | 221.9 (57.9, 581.8)        | 230.5 (60.2, 604.4)                             | 14.3 (8.7, 22.8)     | 0.020 (0.009, 0.035)                |
| Federated States of Micronesia                                                                | 5.4 (1.9, 12.3)            | 4,618.2 (1,608.8, 10,475.5)                     | 2.7 (1.7, 4.2)       | 4.433 (2.326, 6.594)                |
| Fiji                                                                                          | 31.3 (12.2, 66.3)          | 3,204.4 (1,244.6, 6,780.4)                      | 2.8 (1.6, 8.5)       | 0.383 (0.233, 1.179)                |
| Finland                                                                                       | 0.0 (0.0, 0.0)             | 0.0 (0.0, 0.0)                                  | 0.6 (0.5, 0.9)       | 0.010 (0.009, 0.015)                |
| France                                                                                        | 0.0 (0.0, 0.0)             | 0.0 (0.0, 0.0)                                  | 6.1 (4.1, 7.0)       | 0.009 (0.006, 0.011)                |
| Gabon                                                                                         | 14.9 (6.4, 30.2)           | 882.4 (376.9, 1,785.7)                          | 1.3 (0.9, 2.0)       | 0.075 (0.051, 0.112)                |
| Georgia                                                                                       | 0.0 (0.0, 0.0)             | 0.0 (0.0, 0.0)                                  | 0.5 (0.4, 0.7)       | 0.011 (0.010, 0.015)                |
| Germany                                                                                       | 0.0 (0.0, 0.0)             | 0.0 (0.0, 0.0)                                  | 8.9 (7.5, 17.1)      | 0.010 (0.009, 0.017)                |
| Ghana                                                                                         | 342.9 (150.5, 680.8)       | 1,308.3 (574.3, 2,597.6)                        | 20.4 (13.2, 30.0)    | 0.072 (0.047, 0.118)                |
| Greece                                                                                        | 0.0 (0.0, 0.0)             | 0.0 (0.0, 0.0)                                  | 1.4 (1.1, 1.7)       | 0.012 (0.009, 0.014)                |
| Grenada                                                                                       | 3.7 (1.5, 7.9)             | 3,086.9 (1,211.3, 6,508.8)                      | 0.3 (0.2, 0.3)       | 0.265 (0.190, 0.332)                |



**Table S3: Dengue cases and deaths (and 95% uncertainty intervals) by country, for 2013**

| Country          | Cases (thousands)            | Age-standardized incidence (per 100,000) | Deaths                     | Mortality rate (per 100,000) |
|------------------|------------------------------|------------------------------------------|----------------------------|------------------------------|
| Guatemala        | 188.2 (82.4, 374.0)          | 1,193.4 (522.6, 2,371.9)                 | 21.8 (14.5, 28.6)          | 0.150 (0.102, 0.188)         |
| Guinea           | 78.3 (31.4, 163.1)           | 657.7 (263.3, 1,370.0)                   | 6.8 (3.8, 9.8)             | 0.049 (0.030, 0.082)         |
| Guinea-Bissau    | 17.4 (7.5, 34.8)             | 1,006.4 (433.7, 2,013.6)                 | 1.8 (1.0, 2.8)             | 0.089 (0.056, 0.129)         |
| Guyana           | 12.0 (5.3, 23.8)             | 1,310.7 (575.4, 2,602.4)                 | 3.5 (2.4, 4.9)             | 0.479 (0.331, 0.630)         |
| Haiti            | 116.8 (50.3, 233.8)          | 989.0 (425.7, 1,980.6)                   | 2.7 (2.0, 5.2)             | 0.030 (0.023, 0.052)         |
| Honduras         | 171.4 (73.0, 347.8)          | 2,082.4 (887.2, 4,224.5)                 | 24.2 (15.5, 40.2)          | 0.469 (0.309, 0.742)         |
| Hungary          | 0.0 (0.0, 0.0)               | 0.0 (0.0, 0.0)                           | 0.9 (0.6, 1.0)             | 0.009 (0.006, 0.010)         |
| Iceland          | 0.0 (0.0, 0.0)               | 0.0 (0.0, 0.0)                           | 0.0 (0.0, 0.0)             | 0.010 (0.006, 0.013)         |
| India            | 18,617.1 (8,154.6, 36,999.7) | 1,480.4 (648.4, 2,942.1)                 | 1,662.5 (1,318.3, 2,298.3) | 0.160 (0.128, 0.222)         |
| Indonesia        | 11,101.2 (3,939.7, 24,968.5) | 4,446.0 (1,577.8, 9,999.7)               | 3,096.0 (1,256.5, 4,120.3) | 1.222 (0.514, 1.609)         |
| Iran             | 0.0 (0.0, 0.0)               | 0.0 (0.0, 0.0)                           | 7.4 (5.9, 9.1)             | 0.010 (0.008, 0.012)         |
| Iraq             | 0.0 (0.0, 0.0)               | 0.0 (0.0, 0.0)                           | 6.2 (4.4, 8.2)             | 0.016 (0.012, 0.023)         |
| Ireland          | 0.0 (0.0, 0.0)               | 0.0 (0.0, 0.0)                           | 0.4 (0.3, 0.5)             | 0.010 (0.007, 0.011)         |
| Israel           | 0.0 (0.0, 0.0)               | 0.0 (0.0, 0.0)                           | 0.8 (0.7, 1.4)             | 0.010 (0.009, 0.018)         |
| Italy            | 0.0 (0.0, 0.0)               | 0.0 (0.0, 0.0)                           | 5.7 (3.6, 6.5)             | 0.009 (0.006, 0.010)         |
| Jamaica          | 75.7 (31.7, 155.0)           | 2,368.1 (991.9, 4,850.5)                 | 4.1 (3.0, 6.0)             | 0.150 (0.111, 0.220)         |
| Japan            | 0.0 (0.0, 0.0)               | 0.0 (0.0, 0.0)                           | 12.2 (8.8, 14.2)           | 0.010 (0.007, 0.011)         |
| Jordan           | 0.0 (0.0, 0.0)               | 0.0 (0.0, 0.0)                           | 0.7 (0.5, 0.9)             | 0.009 (0.007, 0.012)         |
| Kazakhstan       | 0.0 (0.0, 0.0)               | 0.0 (0.0, 0.0)                           | 4.6 (3.6, 7.1)             | 0.028 (0.022, 0.042)         |
| Kenya            | 43.5 (7.1, 144.8)            | 96.4 (15.6, 320.9)                       | 3.8 (2.5, 8.4)             | 0.009 (0.006, 0.018)         |
| Kiribati         | 1.5 (0.6, 2.9)               | 1,274.9 (559.5, 2,531.9)                 | 7.0 (3.4, 9.3)             | 11.927 (5.356, 16.148)       |
| Kuwait           | 0.0 (0.0, 0.0)               | 0.0 (0.0, 0.0)                           | 0.4 (0.3, 0.5)             | 0.011 (0.010, 0.017)         |
| Kyrgyzstan       | 6.9 (1.3, 21.5)              | 124.8 (23.9, 387.2)                      | 0.5 (0.4, 0.7)             | 0.009 (0.008, 0.012)         |
| Laos             | 99.0 (43.4, 196.6)           | 1,441.4 (631.8, 2,863.9)                 | 35.0 (17.9, 56.3)          | 0.430 (0.224, 0.684)         |
| Latvia           | 0.0 (0.0, 0.0)               | 0.0 (0.0, 0.0)                           | 0.2 (0.1, 0.2)             | 0.010 (0.006, 0.012)         |
| Lebanon          | 0.0 (0.0, 0.0)               | 0.0 (0.0, 0.0)                           | 0.5 (0.4, 0.7)             | 0.011 (0.008, 0.014)         |
| Lesotho          | 0.0 (0.0, 0.0)               | 0.0 (0.0, 0.0)                           | 0.2 (0.2, 0.3)             | 0.013 (0.009, 0.016)         |
| Liberia          | 46.7 (20.3, 93.1)            | 1,073.4 (466.1, 2,140.8)                 | 2.6 (1.3, 4.6)             | 0.057 (0.030, 0.115)         |
| Libya            | 0.0 (0.0, 0.0)               | 0.0 (0.0, 0.0)                           | 0.7 (0.6, 1.0)             | 0.012 (0.010, 0.018)         |
| Lithuania        | 0.0 (0.0, 0.0)               | 0.0 (0.0, 0.0)                           | 0.3 (0.2, 0.3)             | 0.009 (0.006, 0.011)         |
| Luxembourg       | 0.0 (0.0, 0.0)               | 0.0 (0.0, 0.0)                           | 0.1 (0.0, 0.1)             | 0.012 (0.007, 0.014)         |
| Macedonia        | 0.0 (0.0, 0.0)               | 0.0 (0.0, 0.0)                           | 0.2 (0.2, 0.3)             | 0.011 (0.008, 0.013)         |
| Madagascar       | 62.9 (18.0, 154.9)           | 270.1 (77.5, 665.1)                      | 3.2 (1.4, 5.6)             | 0.019 (0.007, 0.035)         |
| Malawi           | 69.1 (24.2, 156.1)           | 413.7 (145.1, 934.9)                     | 3.7 (2.8, 5.2)             | 0.027 (0.016, 0.033)         |
| Malaysia         | 1,080.2 (402.0, 2,346.4)     | 3,618.5 (1,346.9, 7,860.4)               | 167.9 (132.5, 204.9)       | 0.625 (0.495, 0.771)         |
| Maldives         | 3.8 (1.7, 7.6)               | 1,096.3 (476.7, 2,185.3)                 | 2.0 (1.3, 2.8)             | 0.710 (0.505, 1.044)         |
| Mali             | 71.9 (26.1, 159.3)           | 464.1 (168.3, 1,028.5)                   | 8.1 (4.7, 12.2)            | 0.038 (0.025, 0.057)         |
| Malta            | 0.0 (0.0, 0.0)               | 0.0 (0.0, 0.0)                           | 0.0 (0.0, 0.1)             | 0.010 (0.007, 0.012)         |
| Marshall Islands | 1.9 (0.8, 4.0)               | 2,541.5 (1,042.8, 5,245.4)               | 1.5 (1.0, 2.1)             | 3.451 (2.150, 4.689)         |
| Mauritania       | 9.7 (2.6, 24.7)              | 244.9 (65.7, 626.9)                      | 0.8 (0.5, 1.4)             | 0.020 (0.013, 0.038)         |
| Mauritius        | 32.5 (13.3, 67.2)            | 2,629.5 (1,072.9, 5,437.3)               | 2.3 (1.7, 3.0)             | 0.202 (0.156, 0.270)         |
| Mexico           | 663.2 (263.3, 1,410.6)       | 538.7 (213.8, 1,145.9)                   | 53.8 (30.8, 60.1)          | 0.053 (0.029, 0.060)         |
| Moldova          | 0.0 (0.0, 0.0)               | 0.0 (0.0, 0.0)                           | 0.3 (0.2, 0.4)             | 0.009 (0.007, 0.011)         |
| Mongolia         | 0.0 (0.0, 0.0)               | 0.0 (0.0, 0.0)                           | 0.4 (0.3, 0.8)             | 0.014 (0.011, 0.028)         |
| Montenegro       | 0.0 (0.0, 0.0)               | 0.0 (0.0, 0.0)                           | 0.1 (0.0, 0.1)             | 0.009 (0.008, 0.012)         |
| Morocco          | 0.0 (0.0, 0.0)               | 0.0 (0.0, 0.0)                           | 3.4 (2.8, 4.7)             | 0.011 (0.009, 0.015)         |
| Mozambique       | 95.0 (31.6, 220.7)           | 360.3 (120.1, 837.2)                     | 5.4 (3.3, 7.3)             | 0.028 (0.013, 0.039)         |
| Myanmar          | 582.6 (253.0, 1,161.9)       | 1,094.0 (475.1, 2,181.8)                 | 167.9 (83.4, 257.7)        | 0.339 (0.172, 0.518)         |
| Namibia          | 0.0 (0.0, 0.0)               | 0.0 (0.0, 0.0)                           | 0.2 (0.2, 0.3)             | 0.011 (0.009, 0.013)         |
| Nepal            | 226.1 (95.8, 460.6)          | 796.4 (337.4, 1,622.3)                   | 20.3 (13.7, 35.0)          | 0.103 (0.063, 0.171)         |
| Netherlands      | 0.0 (0.0, 0.0)               | 0.0 (0.0, 0.0)                           | 1.7 (1.2, 1.9)             | 0.010 (0.007, 0.011)         |
| New Zealand      | 0.0 (0.0, 0.0)               | 0.0 (0.0, 0.0)                           | 0.4 (0.3, 0.5)             | 0.010 (0.006, 0.011)         |
| Nicaragua        | 120.4 (51.5, 243.0)          | 1,953.2 (836.3, 3,943.2)                 | 12.0 (9.2, 14.3)           | 0.222 (0.172, 0.266)         |
| Niger            | 75.5 (26.5, 170.5)           | 420.2 (147.6, 948.7)                     | 8.2 (5.1, 12.5)            | 0.033 (0.021, 0.059)         |
| Nigeria          | 2,285.2 (1,003.2, 4,537.4)   | 1,303.8 (572.4, 2,588.8)                 | 167.5 (99.8, 262.0)        | 0.074 (0.047, 0.109)         |
| North Korea      | 0.0 (0.0, 0.0)               | 0.0 (0.0, 0.0)                           | 4.2 (2.8, 5.9)             | 0.017 (0.011, 0.024)         |
| Norway           | 0.0 (0.0, 0.0)               | 0.0 (0.0, 0.0)                           | 0.5 (0.4, 0.6)             | 0.010 (0.007, 0.011)         |
| Oman             | 2.0 (0.4, 6.1)               | 54.3 (10.3, 169.7)                       | 0.5 (0.4, 0.8)             | 0.023 (0.017, 0.041)         |
| Pakistan         | 1,403.4 (587.1, 2,876.3)     | 759.6 (317.7, 1,556.7)                   | 174.3 (132.7, 269.7)       | 0.123 (0.093, 0.165)         |
| Palestine        | 0.0 (0.0, 0.0)               | 0.0 (0.0, 0.0)                           | 0.5 (0.4, 0.6)             | 0.012 (0.010, 0.017)         |
| Panama           | 68.2 (29.4, 136.4)           | 1,760.9 (759.9, 3,521.0)                 | 4.3 (3.5, 6.0)             | 0.121 (0.096, 0.165)         |
| Papua New Guinea | 71.8 (30.7, 145.4)           | 881.4 (376.4, 1,783.9)                   | 40.2 (25.8, 83.8)          | 0.860 (0.576, 1.557)         |
| Paraguay         | 111.1 (48.4, 221.5)          | 1,613.8 (702.3, 3,215.8)                 | 23.8 (6.9, 30.5)           | 0.557 (0.146, 0.727)         |
| Peru             | 217.6 (89.0, 449.6)          | 711.6 (291.0, 1,470.5)                   | 18.3 (13.0, 31.9)          | 0.062 (0.044, 0.105)         |
| Philippines      | 3,900.0 (1,426.2, 8,593.4)   | 3,914.8 (1,431.6, 8,626.0)               | 1,210.3 (450.2, 1,611.6)   | 1.033 (0.391, 1.353)         |
| Poland           | 0.0 (0.0, 0.0)               | 0.0 (0.0, 0.0)                           | 4.0 (3.4, 6.9)             | 0.010 (0.009, 0.018)         |
| Portugal         | 0.0 (0.0, 0.0)               | 0.0 (0.0, 0.0)                           | 1.0 (0.7, 1.1)             | 0.009 (0.006, 0.010)         |
| Qatar            | 0.0 (0.0, 0.0)               | 0.0 (0.0, 0.0)                           | 0.2 (0.2, 0.3)             | 0.014 (0.011, 0.017)         |
| Romania          | 0.0 (0.0, 0.0)               | 0.0 (0.0, 0.0)                           | 2.3 (1.8, 5.7)             | 0.012 (0.008, 0.034)         |
| Russia           | 0.0 (0.0, 0.0)               | 0.0 (0.0, 0.0)                           | 15.2 (12.6, 22.2)          | 0.010 (0.009, 0.015)         |

**Table S3: Dengue cases and deaths (and 95% uncertainty intervals) by country, for 2013**

| Country                          | Cases (thousands)        | Age-standardized incidence (per 100,000) | Deaths               | Mortality rate (per 100,000) |
|----------------------------------|--------------------------|------------------------------------------|----------------------|------------------------------|
| Rwanda                           | 27.8 (7.3, 72.9)         | 232.1 (60.6, 608.2)                      | 1.6 (1.1, 2.3)       | 0.019 (0.009, 0.028)         |
| Saint Lucia                      | 6.2 (2.5, 13.2)          | 3,001.2 (1,183.7, 6,333.9)               | 0.4 (0.3, 0.5)       | 0.210 (0.158, 0.284)         |
| Saint Vincent and the Grenadines | 2.5 (1.1, 5.0)           | 1,978.2 (847.0, 3,993.5)                 | 0.3 (0.2, 0.4)       | 0.249 (0.186, 0.344)         |
| Samoa                            | 2.0 (0.9, 4.1)           | 948.9 (407.4, 1,909.0)                   | 1.4 (0.9, 2.5)       | 1.177 (0.753, 1.910)         |
| Sao Tome and Principe            | 1.9 (0.8, 3.9)           | 992.5 (427.3, 1,987.5)                   | 0.1 (0.0, 0.2)       | 0.047 (0.022, 0.097)         |
| Saudi Arabia                     | 10.3 (1.7, 33.9)         | 36.1 (6.1, 118.6)                        | 5.3 (3.8, 6.3)       | 0.021 (0.014, 0.025)         |
| Senegal                          | 118.9 (50.5, 241.8)      | 829.6 (352.6, 1,687.1)                   | 7.6 (5.0, 12.7)      | 0.051 (0.033, 0.098)         |
| Serbia                           | 0.0 (0.0, 0.0)           | 0.0 (0.0, 0.0)                           | 0.9 (0.7, 1.1)       | 0.010 (0.007, 0.011)         |
| Seychelles                       | 1.4 (0.6, 2.8)           | 1,521.1 (666.0, 3,023.5)                 | 0.3 (0.2, 0.4)       | 0.324 (0.236, 0.487)         |
| Sierra Leone                     | 71.8 (31.4, 142.9)       | 1,157.1 (505.6, 2,301.9)                 | 6.5 (3.8, 9.7)       | 0.088 (0.054, 0.130)         |
| Singapore                        | 15.0 (2.9, 46.5)         | 393.2 (75.7, 1,215.4)                    | 1.1 (0.8, 1.5)       | 0.026 (0.020, 0.035)         |
| Slovakia                         | 0.0 (0.0, 0.0)           | 0.0 (0.0, 0.0)                           | 0.5 (0.4, 0.7)       | 0.010 (0.007, 0.012)         |
| Slovenia                         | 0.0 (0.0, 0.0)           | 0.0 (0.0, 0.0)                           | 0.2 (0.1, 0.2)       | 0.009 (0.006, 0.012)         |
| Solomon Islands                  | 8.8 (3.9, 17.5)          | 1,400.7 (614.5, 2,781.8)                 | 6.6 (4.0, 10.4)      | 2.089 (1.130, 3.093)         |
| Somalia                          | 26.0 (6.9, 66.6)         | 242.9 (65.0, 623.3)                      | 1.8 (1.1, 2.9)       | 0.021 (0.011, 0.038)         |
| South Africa                     | 0.0 (0.0, 0.0)           | 0.0 (0.0, 0.0)                           | 4.4 (3.5, 7.0)       | 0.009 (0.007, 0.014)         |
| South Korea                      | 0.0 (0.0, 0.0)           | 0.0 (0.0, 0.0)                           | 4.8 (3.8, 6.4)       | 0.010 (0.007, 0.012)         |
| South Sudan                      | 21.8 (5.3, 62.1)         | 190.0 (46.1, 541.8)                      | 1.9 (1.4, 2.4)       | 0.021 (0.012, 0.027)         |
| Spain                            | 0.0 (0.0, 0.0)           | 0.0 (0.0, 0.0)                           | 4.5 (3.1, 5.2)       | 0.009 (0.006, 0.011)         |
| Sri Lanka                        | 689.3 (266.8, 1,461.5)   | 3,258.9 (1,261.6, 6,910.4)               | 119.5 (50.2, 153.7)  | 0.592 (0.252, 0.778)         |
| Sudan                            | 181.6 (66.1, 401.3)      | 468.5 (170.5, 1,035.5)                   | 12.3 (8.2, 17.1)     | 0.031 (0.022, 0.044)         |
| Suriname                         | 15.9 (6.5, 32.9)         | 2,596.2 (1,060.3, 5,366.8)               | 1.8 (1.2, 2.2)       | 0.353 (0.233, 0.440)         |
| Swaziland                        | 0.0 (0.0, 0.0)           | 0.0 (0.0, 0.0)                           | 0.2 (0.1, 0.2)       | 0.013 (0.009, 0.018)         |
| Sweden                           | 0.0 (0.0, 0.0)           | 0.0 (0.0, 0.0)                           | 0.9 (0.7, 1.1)       | 0.010 (0.006, 0.011)         |
| Switzerland                      | 0.0 (0.0, 0.0)           | 0.0 (0.0, 0.0)                           | 0.7 (0.5, 0.8)       | 0.009 (0.006, 0.010)         |
| Syria                            | 49.7 (12.8, 132.9)       | 223.2 (57.3, 597.0)                      | 3.6 (2.4, 5.3)       | 0.024 (0.015, 0.032)         |
| Taiwan                           | 182.0 (76.3, 372.7)      | 787.3 (329.9, 1,612.4)                   | 4.5 (3.7, 5.7)       | 0.018 (0.015, 0.024)         |
| Tajikistan                       | 22.3 (6.4, 55.1)         | 269.6 (76.8, 665.6)                      | 1.3 (1.1, 1.8)       | 0.014 (0.012, 0.020)         |
| Tanzania                         | 179.7 (59.8, 417.7)      | 359.6 (119.6, 836.0)                     | 11.2 (7.8, 14.6)     | 0.023 (0.014, 0.030)         |
| Thailand                         | 1,689.8 (696.7, 3,482.0) | 2,556.4 (1,054.0, 5,267.8)               | 175.8 (138.5, 306.6) | 0.328 (0.255, 0.572)         |
| The Bahamas                      | 2.3 (0.4, 7.6)           | 549.5 (98.1, 1,783.3)                    | 0.8 (0.6, 1.1)       | 0.232 (0.179, 0.314)         |
| The Gambia                       | 21.8 (9.5, 43.3)         | 1,159.1 (506.6, 2,305.8)                 | 1.2 (0.7, 1.9)       | 0.060 (0.033, 0.112)         |
| Timor-Leste                      | 9.9 (4.2, 20.0)          | 843.1 (359.3, 1,710.1)                   | 4.1 (2.7, 5.6)       | 0.246 (0.171, 0.331)         |
| Togo                             | 62.2 (26.6, 125.7)       | 901.0 (385.5, 1,820.4)                   | 4.5 (2.7, 6.9)       | 0.057 (0.035, 0.093)         |
| Tonga                            | 2.9 (1.2, 5.9)           | 2,413.8 (1,002.7, 4,961.0)               | 3.8 (1.6, 5.2)       | 4.787 (1.850, 6.327)         |
| Trinidad and Tobago              | 10.2 (1.7, 33.4)         | 670.5 (113.3, 2,202.9)                   | 3.3 (2.5, 4.1)       | 0.248 (0.189, 0.320)         |
| Tunisia                          | 0.0 (0.0, 0.0)           | 0.0 (0.0, 0.0)                           | 1.1 (0.9, 1.4)       | 0.010 (0.008, 0.014)         |
| Turkey                           | 0.0 (0.0, 0.0)           | 0.0 (0.0, 0.0)                           | 8.1 (6.7, 11.2)      | 0.011 (0.009, 0.015)         |
| Turkmenistan                     | 21.0 (7.3, 48.0)         | 399.4 (137.6, 911.4)                     | 3.2 (2.0, 4.3)       | 0.058 (0.036, 0.077)         |
| Uganda                           | 221.0 (85.8, 467.6)      | 576.3 (223.8, 1,219.5)                   | 10.6 (8.5, 13.6)     | 0.038 (0.022, 0.046)         |
| Ukraine                          | 0.0 (0.0, 0.0)           | 0.0 (0.0, 0.0)                           | 4.5 (3.5, 5.5)       | 0.010 (0.007, 0.011)         |
| United Arab Emirates             | 0.0 (0.0, 0.0)           | 0.0 (0.0, 0.0)                           | 1.2 (0.8, 1.8)       | 0.013 (0.010, 0.020)         |
| United Kingdom                   | 0.0 (0.0, 0.0)           | 0.0 (0.0, 0.0)                           | 5.8 (4.0, 6.4)       | 0.009 (0.006, 0.010)         |
| United States                    | 51.0 (6.0, 189.5)        | 16.2 (1.9, 60.1)                         | 30.7 (23.1, 36.1)    | 0.010 (0.007, 0.011)         |
| Uruguay                          | 0.0 (0.0, 0.0)           | 0.0 (0.0, 0.0)                           | 0.5 (0.4, 1.4)       | 0.015 (0.010, 0.040)         |
| Uzbekistan                       | 42.4 (8.8, 127.5)        | 145.8 (30.3, 438.1)                      | 2.9 (2.4, 4.3)       | 0.010 (0.008, 0.015)         |
| Vanuatu                          | 2.8 (1.2, 5.6)           | 992.6 (427.3, 1,987.3)                   | 2.4 (1.6, 3.9)       | 1.521 (0.928, 2.244)         |
| Venezuela                        | 496.1 (215.9, 988.5)     | 1,627.0 (708.1, 3,241.9)                 | 47.5 (34.8, 55.8)    | 0.172 (0.126, 0.205)         |
| Vietnam                          | 2,267.0 (940.1, 4,662.0) | 2,480.9 (1,028.8, 5,102.0)               | 278.0 (160.9, 413.6) | 0.332 (0.190, 0.488)         |
| Yemen                            | 108.1 (38.5, 242.8)      | 431.4 (153.5, 969.2)                     | 6.9 (4.0, 11.1)      | 0.030 (0.017, 0.049)         |
| Zambia                           | 41.3 (12.0, 100.9)       | 278.6 (81.2, 681.6)                      | 2.4 (1.8, 3.2)       | 0.022 (0.014, 0.028)         |
| Zimbabwe                         | 42.5 (12.8, 102.7)       | 293.5 (88.4, 709.4)                      | 1.5 (1.0, 3.4)       | 0.011 (0.007, 0.024)         |

| <b>Table S4: Burden metrics (and 95% uncertainty intervals) by country, for 2013</b> |                              |                     |                              |                      |                               |                       |
|--------------------------------------------------------------------------------------|------------------------------|---------------------|------------------------------|----------------------|-------------------------------|-----------------------|
| Country                                                                              | YLDs                         | YLDs per 100,000    | YLLs                         | YLLs per 100,000     | DALYs                         | DALYs per 100,000     |
| <b>Afghanistan</b>                                                                   | 1,016.6 (271.0, 2,802.7)     | 3.17 (0.86, 8.76)   | 860.6 (360.4, 1,240.2)       | 2.37 (0.96, 3.47)    | 1,877.2 (895.5, 3,710.4)      | 5.54 (2.62, 11.28)    |
| <b>Albania</b>                                                                       | 0.0 (0.0, 0.0)               | 0.00 (0.00, 0.00)   | 16.9 (12.4, 24.4)            | 0.56 (0.40, 0.84)    | 16.9 (12.4, 24.4)             | 0.56 (0.40, 0.84)     |
| <b>Algeria</b>                                                                       | 0.0 (0.0, 0.0)               | 0.00 (0.00, 0.00)   | 218.8 (180.6, 306.0)         | 0.52 (0.43, 0.74)    | 218.8 (180.6, 306.0)          | 0.52 (0.43, 0.74)     |
| <b>Andorra</b>                                                                       | 0.0 (0.0, 0.0)               | 0.00 (0.00, 0.00)   | 0.3 (0.2, 0.4)               | 0.38 (0.22, 0.54)    | 0.3 (0.2, 0.4)                | 0.38 (0.22, 0.54)     |
| <b>Angola</b>                                                                        | 941.0 (267.0, 2,501.4)       | 4.20 (1.19, 11.35)  | 860.5 (508.6, 1,438.6)       | 2.45 (1.60, 3.97)    | 1,801.5 (963.3, 3,441.9)      | 6.65 (3.41, 13.66)    |
| <b>Antigua and Barbuda</b>                                                           | 6.0 (0.8, 21.7)              | 6.66 (0.87, 24.25)  | 8.8 (6.0, 12.4)              | 9.86 (6.71, 14.04)   | 14.8 (8.5, 29.9)              | 16.52 (9.61, 33.32)   |
| <b>Argentina</b>                                                                     | 1,460.9 (389.0, 3,979.2)     | 3.52 (0.94, 9.59)   | 948.9 (736.3, 1,458.1)       | 2.39 (1.84, 3.68)    | 2,409.8 (1,293.9, 4,869.8)    | 5.91 (3.21, 11.83)    |
| <b>Armenia</b>                                                                       | 0.0 (0.0, 0.0)               | 0.00 (0.00, 0.00)   | 17.9 (13.5, 21.7)            | 0.64 (0.48, 0.79)    | 17.9 (13.5, 21.7)             | 0.64 (0.48, 0.79)     |
| <b>Australia</b>                                                                     | 43.7 (4.6, 166.0)            | 0.19 (0.02, 0.71)   | 112.5 (71.0, 128.6)          | 0.52 (0.33, 0.60)    | 156.2 (103.5, 276.9)          | 0.70 (0.46, 1.22)     |
| <b>Austria</b>                                                                       | 0.0 (0.0, 0.0)               | 0.00 (0.00, 0.00)   | 35.5 (23.7, 40.6)            | 0.49 (0.32, 0.58)    | 35.5 (23.7, 40.6)             | 0.49 (0.32, 0.58)     |
| <b>Azerbaijan</b>                                                                    | 0.0 (0.0, 0.0)               | 0.00 (0.00, 0.00)   | 53.7 (44.4, 83.7)            | 0.56 (0.46, 0.88)    | 53.7 (44.4, 83.7)             | 0.56 (0.46, 0.88)     |
| <b>Bahrain</b>                                                                       | 0.0 (0.0, 0.0)               | 0.00 (0.00, 0.00)   | 6.9 (4.8, 8.4)               | 0.51 (0.35, 0.61)    | 6.9 (4.8, 8.4)                | 0.51 (0.35, 0.61)     |
| <b>Bangladesh</b>                                                                    | 24,002.3 (8,501.0, 57,387.6) | 15.03 (5.36, 35.91) | 12,391.3 (7,085.3, 18,677.4) | 8.27 (4.59, 12.31)   | 36,393.6 (19,940.7, 69,218.9) | 23.30 (12.92, 44.30)  |
| <b>Barbados</b>                                                                      | 18.0 (2.3, 66.9)             | 6.46 (0.82, 23.80)  | 20.9 (15.5, 28.8)            | 7.76 (5.61, 11.14)   | 38.9 (21.8, 84.8)             | 14.21 (7.91, 30.36)   |
| <b>Belarus</b>                                                                       | 0.0 (0.0, 0.0)               | 0.00 (0.00, 0.00)   | 46.7 (37.4, 62.8)            | 0.54 (0.42, 0.69)    | 46.7 (37.4, 62.8)             | 0.54 (0.42, 0.69)     |
| <b>Belgium</b>                                                                       | 0.0 (0.0, 0.0)               | 0.00 (0.00, 0.00)   | 49.7 (38.7, 59.2)            | 0.52 (0.39, 0.61)    | 49.7 (38.7, 59.2)             | 0.52 (0.39, 0.61)     |
| <b>Belize</b>                                                                        | 56.1 (19.4, 137.6)           | 16.54 (5.69, 40.64) | 49.2 (34.3, 69.0)            | 14.41 (10.21, 19.36) | 105.3 (64.2, 186.1)           | 30.95 (18.80, 54.92)  |
| <b>Benin</b>                                                                         | 1,108.4 (381.1, 2,712.6)     | 10.42 (3.61, 25.27) | 408.3 (226.2, 638.8)         | 3.13 (1.85, 5.29)    | 1,516.7 (743.9, 3,105.6)      | 13.55 (6.48, 28.55)   |
| <b>Bhutan</b>                                                                        | 28.4 (7.7, 79.6)             | 3.71 (1.03, 10.33)  | 22.7 (13.6, 44.5)            | 3.11 (1.91, 5.78)    | 51.1 (26.9, 103.3)            | 6.82 (3.69, 13.53)    |
| <b>Bolivia</b>                                                                       | 324.6 (80.1, 923.2)          | 2.97 (0.74, 8.48)   | 95.3 (65.1, 211.2)           | 0.90 (0.60, 2.09)    | 420.0 (162.7, 1,007.9)        | 3.87 (1.51, 9.23)     |
| <b>Bosnia and Herzegovina</b>                                                        | 0.0 (0.0, 0.0)               | 0.00 (0.00, 0.00)   | 24.5 (19.8, 46.3)            | 0.73 (0.57, 1.35)    | 24.5 (19.8, 46.3)             | 0.73 (0.57, 1.35)     |
| <b>Botswana</b>                                                                      | 0.0 (0.0, 0.0)               | 0.00 (0.00, 0.00)   | 8.2 (5.9, 11.3)              | 0.36 (0.26, 0.49)    | 8.2 (5.9, 11.3)               | 0.36 (0.26, 0.49)     |
| <b>Brazil</b>                                                                        | 18,330.2 (6,238.9, 45,335.7) | 9.13 (3.12, 22.60)  | 10,744.5 (1,627.1, 13,098.9) | 5.59 (0.80, 6.85)    | 29,074.6 (13,953.0, 55,442.7) | 14.72 (7.11, 27.85)   |
| <b>Brunei</b>                                                                        | 11.7 (1.9, 39.6)             | 2.80 (0.46, 9.51)   | 5.6 (4.2, 13.4)              | 1.29 (0.95, 3.19)    | 17.2 (6.8, 45.1)              | 4.09 (1.57, 10.75)    |
| <b>Bulgaria</b>                                                                      | 0.0 (0.0, 0.0)               | 0.00 (0.00, 0.00)   | 43.6 (36.9, 57.6)            | 0.75 (0.61, 1.03)    | 43.6 (36.9, 57.6)             | 0.75 (0.61, 1.03)     |
| <b>Burkina Faso</b>                                                                  | 925.9 (290.3, 2,309.6)       | 5.30 (1.68, 13.44)  | 685.7 (431.5, 1,038.7)       | 2.65 (1.70, 3.80)    | 1,611.5 (891.6, 3,053.2)      | 7.95 (4.13, 16.17)    |
| <b>Burundi</b>                                                                       | 306.3 (75.9, 847.9)          | 2.92 (0.73, 8.09)   | 113.6 (83.4, 152.1)          | 1.13 (0.61, 1.51)    | 419.9 (184.3, 964.6)          | 4.05 (1.85, 9.32)     |
| <b>Cambodia</b>                                                                      | 4,027.3 (1,333.1, 9,903.5)   | 25.92 (8.65, 64.04) | 8,114.2 (4,679.6, 10,867.9)  | 44.16 (25.79, 58.27) | 12,141.5 (7,687.7, 18,683.0)  | 70.07 (44.16, 110.13) |
| <b>Cameroon</b>                                                                      | 1,776.4 (617.8, 4,322.1)     | 7.72 (2.67, 18.89)  | 1,405.6 (809.0, 2,241.4)     | 4.33 (2.82, 6.46)    | 3,182.0 (1,798.4, 5,880.7)    | 12.04 (6.70, 23.33)   |
| <b>Canada</b>                                                                        | 0.0 (0.0, 0.0)               | 0.00 (0.00, 0.00)   | 162.6 (112.0, 186.0)         | 0.53 (0.35, 0.62)    | 162.6 (112.0, 186.0)          | 0.53 (0.35, 0.62)     |
| <b>Cape Verde</b>                                                                    | 17.8 (4.7, 48.2)             | 3.47 (0.94, 9.55)   | 6.3 (3.5, 14.1)              | 1.15 (0.64, 2.60)    | 24.0 (10.2, 54.5)             | 4.63 (1.93, 10.74)    |
| <b>Central African Republic</b>                                                      | 244.1 (74.4, 641.0)          | 5.12 (1.57, 13.47)  | 182.1 (92.5, 289.6)          | 2.91 (1.63, 4.42)    | 426.3 (231.5, 838.0)          | 8.03 (4.24, 16.46)    |
| <b>Chad</b>                                                                          | 511.2 (142.6, 1,430.8)       | 3.84 (1.09, 10.59)  | 479.7 (257.0, 768.5)         | 2.25 (1.45, 3.38)    | 990.9 (527.7, 1,912.4)        | 6.09 (3.16, 12.78)    |
| <b>Chile</b>                                                                         | 0.0 (0.0, 0.0)               | 0.00 (0.00, 0.00)   | 112.3 (82.1, 275.4)          | 0.67 (0.48, 1.70)    | 112.3 (82.1, 275.4)           | 0.67 (0.48, 1.70)     |
| <b>China</b>                                                                         | 10,451.5 (2,782.8, 29,404.5) | 0.78 (0.21, 2.20)   | 6,895.7 (5,653.5, 7,927.7)   | 0.53 (0.43, 0.59)    | 17,347.3 (9,634.4, 36,475.9)  | 1.30 (0.73, 2.72)     |
| <b>Colombia</b>                                                                      | 4,906.6 (1,722.9, 11,910.4)  | 10.09 (3.53, 24.53) | 5,085.9 (1,242.7, 6,719.9)   | 10.39 (2.53, 13.67)  | 9,992.5 (5,069.5, 17,253.9)   | 20.48 (10.38, 35.37)  |
| <b>Comoros</b>                                                                       | 37.6 (11.4, 98.1)            | 4.96 (1.50, 12.94)  | 11.2 (5.9, 17.3)             | 1.74 (0.74, 2.76)    | 48.8 (21.5, 108.3)            | 6.70 (3.06, 14.51)    |
| <b>Congo</b>                                                                         | 210.9 (61.1, 554.0)          | 4.62 (1.35, 12.07)  | 123.8 (80.7, 189.6)          | 2.14 (1.43, 3.24)    | 334.7 (173.7, 662.1)          | 6.76 (3.41, 13.97)    |
| <b>Costa Rica</b>                                                                    | 448.8 (151.2, 1,076.6)       | 9.20 (3.09, 22.13)  | 65.6 (54.1, 124.9)           | 1.37 (1.12, 2.63)    | 514.4 (210.7, 1,134.3)        | 10.56 (4.36, 23.34)   |
| <b>Cote d'Ivoire</b>                                                                 | 3,001.1 (1,071.9, 7,138.7)   | 14.36 (5.14, 34.39) | 1,557.9 (952.2, 2,237.6)     | 5.72 (3.81, 7.75)    | 4,559.1 (2,567.0, 8,861.7)    | 20.08 (10.75, 40.41)  |
| <b>Croatia</b>                                                                       | 0.0 (0.0, 0.0)               | 0.00 (0.00, 0.00)   | 18.3 (13.1, 21.5)            | 0.50 (0.35, 0.61)    | 18.3 (13.1, 21.5)             | 0.50 (0.35, 0.61)     |
| <b>Cuba</b>                                                                          | 2,017.8 (710.5, 4,905.3)     | 18.31 (6.45, 44.30) | 362.5 (282.1, 546.9)         | 4.01 (3.00, 6.26)    | 2,380.3 (1,066.9, 5,233.3)    | 22.31 (10.22, 47.79)  |
| <b>Cyprus</b>                                                                        | 0.0 (0.0, 0.0)               | 0.00 (0.00, 0.00)   | 4.9 (3.6, 5.7)               | 0.61 (0.44, 0.71)    | 4.9 (3.6, 5.7)                | 0.61 (0.44, 0.71)     |
| <b>Czech Republic</b>                                                                | 0.0 (0.0, 0.0)               | 0.00 (0.00, 0.00)   | 44.4 (29.0, 51.2)            | 0.49 (0.31, 0.59)    | 44.4 (29.0, 51.2)             | 0.49 (0.31, 0.59)     |
| <b>Democratic Republic of the Congo</b>                                              | 3,405.2 (1,007.7, 8,847.9)   | 4.86 (1.46, 12.57)  | 3,288.3 (1,722.9, 5,223.0)   | 3.16 (1.84, 4.83)    | 6,693.5 (3,568.3, 11,986.5)   | 8.02 (4.14, 15.46)    |
| <b>Denmark</b>                                                                       | 0.0 (0.0, 0.0)               | 0.00 (0.00, 0.00)   | 25.6 (16.9, 29.3)            | 0.52 (0.33, 0.61)    | 25.6 (16.9, 29.3)             | 0.52 (0.33, 0.61)     |
| <b>Djibouti</b>                                                                      | 16.0 (3.0, 49.9)             | 1.79 (0.34, 5.54)   | 8.9 (6.1, 13.2)              | 1.00 (0.65, 1.52)    | 24.8 (11.4, 57.6)             | 2.79 (1.29, 6.40)     |
| <b>Dominica</b>                                                                      | 19.4 (6.3, 48.9)             | 27.43 (8.86, 69.36) | 6.9 (4.8, 10.4)              | 9.96 (6.84, 15.28)   | 26.3 (12.8, 55.1)             | 37.39 (18.30, 78.26)  |
| <b>Dominican Republic</b>                                                            | 2,654.5 (873.5, 6,533.5)     | 25.19 (8.25, 62.26) | 5,421.3 (1,239.2, 7,668.7)   | 47.74 (11.12, 67.31) | 8,075.8 (3,362.0, 12,327.8)   | 72.92 (31.14, 113.08) |
| <b>Ecuador</b>                                                                       | 1,583.6 (556.3, 3,845.3)     | 9.95 (3.50, 24.24)  | 1,407.3 (933.4, 1,762.9)     | 8.25 (5.45, 10.28)   | 2,990.8 (1,904.2, 5,235.0)    | 18.20 (11.42, 32.30)  |
| <b>Egypt</b>                                                                         | 3,979.2 (1,203.5, 10,242.7)  | 4.79 (1.45, 12.29)  | 485.5 (402.2, 752.8)         | 0.55 (0.46, 0.85)    | 4,464.7 (1,664.6, 10,663.0)   | 5.34 (1.98, 12.77)    |
| <b>El Salvador</b>                                                                   | 1,363.1 (470.0, 3,324.9)     | 20.98 (7.23, 51.35) | 219.7 (168.9, 372.6)         | 3.21 (2.46, 5.47)    | 1,582.8 (682.7, 3,513.1)      | 24.19 (10.34, 54.08)  |

|                                       |                              |                       |                             |                         |                               |                         |
|---------------------------------------|------------------------------|-----------------------|-----------------------------|-------------------------|-------------------------------|-------------------------|
| <b>Equatorial Guinea</b>              | 15.7 (2.6, 54.2)             | 2.03 (0.34, 6.81)     | 58.5 (27.4, 114.3)          | 5.54 (2.92, 10.22)      | 74.2 (38.0, 139.4)            | 7.58 (4.14, 14.43)      |
| <b>Eritrea</b>                        | 102.5 (18.6, 331.6)          | 1.57 (0.29, 5.08)     | 49.0 (27.5, 74.9)           | 0.84 (0.37, 1.29)       | 151.5 (63.0, 374.6)           | 2.41 (1.03, 5.82)       |
| <b>Estonia</b>                        | 0.0 (0.0, 0.0)               | 0.00 (0.00, 0.00)     | 5.5 (3.1, 6.6)              | 0.48 (0.25, 0.58)       | 5.5 (3.1, 6.6)                | 0.48 (0.25, 0.58)       |
| <b>Ethiopia</b>                       | 2,162.1 (461.6, 6,638.5)     | 2.21 (0.50, 6.73)     | 785.1 (539.5, 1,235.6)      | 0.87 (0.51, 1.39)       | 2,947.2 (1,173.9, 7,345.8)    | 3.09 (1.27, 7.51)       |
| <b>Federated States of Micronesia</b> | 48.3 (13.8, 130.9)           | 44.77 (12.70, 121.57) | 110.1 (68.2, 193.5)         | 124.11 (76.85, 197.15)  | 158.3 (99.8, 263.0)           | 168.88 (107.64, 270.75) |
| <b>Fiji</b>                           | 274.3 (87.3, 695.1)          | 30.95 (9.87, 78.63)   | 131.4 (74.5, 418.7)         | 15.12 (8.76, 47.89)     | 405.7 (184.2, 865.9)          | 46.07 (21.01, 97.76)    |
| <b>Finland</b>                        | 0.0 (0.0, 0.0)               | 0.00 (0.00, 0.00)     | 24.7 (20.9, 35.7)           | 0.53 (0.42, 0.68)       | 24.7 (20.9, 35.7)             | 0.53 (0.42, 0.68)       |
| <b>France</b>                         | 0.0 (0.0, 0.0)               | 0.00 (0.00, 0.00)     | 276.5 (178.6, 319.9)        | 0.50 (0.31, 0.58)       | 276.5 (178.6, 319.9)          | 0.50 (0.31, 0.58)       |
| <b>Gabon</b>                          | 143.6 (48.8, 369.8)          | 8.38 (2.89, 21.29)    | 86.5 (56.0, 133.4)          | 4.24 (2.82, 6.34)       | 230.1 (122.0, 453.5)          | 12.62 (6.57, 25.60)     |
| <b>Georgia</b>                        | 0.0 (0.0, 0.0)               | 0.00 (0.00, 0.00)     | 23.3 (20.0, 31.6)           | 0.59 (0.50, 0.80)       | 23.3 (20.0, 31.6)             | 0.59 (0.50, 0.80)       |
| <b>Germany</b>                        | 0.0 (0.0, 0.0)               | 0.00 (0.00, 0.00)     | 365.1 (323.7, 570.0)        | 0.55 (0.48, 0.87)       | 365.1 (323.7, 570.0)          | 0.55 (0.48, 0.87)       |
| <b>Ghana</b>                          | 3,328.6 (1,154.3, 7,978.9)   | 12.55 (4.40, 29.99)   | 1,407.6 (903.4, 2,096.9)    | 4.24 (2.75, 6.24)       | 4,736.2 (2,490.1, 9,328.8)    | 16.79 (8.36, 34.07)     |
| <b>Greece</b>                         | 0.0 (0.0, 0.0)               | 0.00 (0.00, 0.00)     | 56.5 (45.8, 68.6)           | 0.61 (0.49, 0.74)       | 56.5 (45.8, 68.6)             | 0.61 (0.49, 0.74)       |
| <b>Grenada</b>                        | 31.8 (10.3, 81.7)            | 29.63 (9.65, 76.03)   | 11.6 (8.6, 15.1)            | 10.98 (8.13, 14.16)     | 43.4 (21.6, 92.3)             | 40.60 (20.14, 86.25)    |
| <b>Guatemala</b>                      | 1,820.6 (631.4, 4,429.9)     | 11.36 (3.98, 27.36)   | 1,363.3 (892.8, 1,868.2)    | 7.02 (4.66, 9.25)       | 3,183.9 (1,919.1, 5,675.4)    | 18.38 (10.88, 34.02)    |
| <b>Guinea</b>                         | 759.0 (243.4, 1,930.3)       | 6.28 (2.04, 15.96)    | 487.6 (267.2, 726.7)        | 2.98 (1.69, 4.32)       | 1,246.6 (686.3, 2,409.0)      | 9.25 (4.79, 18.82)      |
| <b>Guinea-Bissau</b>                  | 168.3 (59.6, 407.3)          | 9.60 (3.41, 23.15)    | 131.1 (64.6, 210.1)         | 5.54 (3.05, 8.38)       | 299.4 (165.5, 549.8)          | 15.14 (8.38, 29.47)     |
| <b>Guyana</b>                         | 103.1 (35.7, 244.1)          | 12.60 (4.40, 29.94)   | 207.5 (139.2, 315.3)        | 24.16 (16.29, 35.66)    | 310.6 (206.4, 476.1)          | 36.75 (24.73, 55.96)    |
| <b>Haiti</b>                          | 998.8 (352.6, 2,429.7)       | 9.45 (3.35, 23.05)    | 164.9 (116.7, 341.5)        | 1.42 (1.04, 2.83)       | 1,163.7 (502.3, 2,580.5)      | 10.87 (4.66, 24.35)     |
| <b>Honduras</b>                       | 1,663.9 (572.5, 4,035.9)     | 19.98 (6.92, 48.65)   | 964.5 (564.1, 1,774.3)      | 12.34 (7.59, 21.37)     | 2,628.4 (1,367.7, 5,004.4)    | 32.32 (17.47, 60.43)    |
| <b>Hungary</b>                        | 0.0 (0.0, 0.0)               | 0.00 (0.00, 0.00)     | 40.4 (25.3, 46.4)           | 0.47 (0.28, 0.56)       | 40.4 (25.3, 46.4)             | 0.47 (0.28, 0.56)       |
| <b>Iceland</b>                        | 0.0 (0.0, 0.0)               | 0.00 (0.00, 0.00)     | 1.6 (0.9, 2.1)              | 0.56 (0.31, 0.72)       | 1.6 (0.9, 2.1)                | 0.56 (0.31, 0.72)       |
| <b>India</b>                          | 179,728 (63,701, 437,457)    | 14.18 (5.04, 34.38)   | 79,929 (62,049, 116,575)    | 6.42 (5.04, 9.25)       | 259,657 (141,349, 504,077)    | 20.60 (11.27, 39.92)    |
| <b>Indonesia</b>                      | 108,254 (31,203, 293,841)    | 43.16 (12.50, 117.27) | 225,399 (86,773, 308,777)   | 84.74 (32.83, 115.85)   | 333,653 (166,183, 522,387)    | 127.90 (64.17, 202.32)  |
| <b>Iran</b>                           | 0.0 (0.0, 0.0)               | 0.00 (0.00, 0.00)     | 412.0 (325.9, 507.0)        | 0.51 (0.41, 0.63)       | 412.0 (325.9, 507.0)          | 0.51 (0.41, 0.63)       |
| <b>Iraq</b>                           | 0.0 (0.0, 0.0)               | 0.00 (0.00, 0.00)     | 419.1 (283.6, 555.7)        | 0.98 (0.71, 1.31)       | 419.1 (283.6, 555.7)          | 0.98 (0.71, 1.31)       |
| <b>Ireland</b>                        | 0.0 (0.0, 0.0)               | 0.00 (0.00, 0.00)     | 21.9 (15.3, 26.2)           | 0.51 (0.36, 0.61)       | 21.9 (15.3, 26.2)             | 0.51 (0.36, 0.61)       |
| <b>Israel</b>                         | 0.0 (0.0, 0.0)               | 0.00 (0.00, 0.00)     | 42.5 (36.4, 69.4)           | 0.55 (0.47, 0.89)       | 42.5 (36.4, 69.4)             | 0.55 (0.47, 0.89)       |
| <b>Italy</b>                          | 0.0 (0.0, 0.0)               | 0.00 (0.00, 0.00)     | 246.3 (153.4, 285.1)        | 0.49 (0.30, 0.58)       | 246.3 (153.4, 285.1)          | 0.49 (0.30, 0.58)       |
| <b>Jamaica</b>                        | 640.6 (215.5, 1,598.4)       | 22.76 (7.62, 56.83)   | 206.8 (137.9, 328.4)        | 7.32 (4.91, 11.59)      | 847.4 (411.0, 1,768.1)        | 30.08 (14.56, 62.83)    |
| <b>Japan</b>                          | 0.0 (0.0, 0.0)               | 0.00 (0.00, 0.00)     | 511.9 (366.7, 590.9)        | 0.53 (0.36, 0.62)       | 511.9 (366.7, 590.9)          | 0.53 (0.36, 0.62)       |
| <b>Jordan</b>                         | 0.0 (0.0, 0.0)               | 0.00 (0.00, 0.00)     | 41.5 (31.8, 52.6)           | 0.51 (0.39, 0.64)       | 41.5 (31.8, 52.6)             | 0.51 (0.39, 0.64)       |
| <b>Kazakhstan</b>                     | 0.0 (0.0, 0.0)               | 0.00 (0.00, 0.00)     | 319.7 (243.4, 492.6)        | 1.85 (1.42, 2.83)       | 319.7 (243.4, 492.6)          | 1.85 (1.42, 2.83)       |
| <b>Kenya</b>                          | 445.5 (56.1, 1,650.8)        | 0.99 (0.13, 3.62)     | 245.4 (161.4, 542.0)        | 0.46 (0.31, 1.00)       | 690.9 (261.3, 1,832.9)        | 1.44 (0.52, 3.96)       |
| <b>Kiribati</b>                       | 12.8 (4.6, 31.5)             | 12.28 (4.49, 30.17)   | 296.0 (156.7, 423.9)        | 329.91 (166.37, 451.30) | 308.8 (170.6, 438.2)          | 342.19 (179.62, 464.58) |
| <b>Kuwait</b>                         | 0.0 (0.0, 0.0)               | 0.00 (0.00, 0.00)     | 21.6 (18.4, 34.0)           | 0.60 (0.51, 0.97)       | 21.6 (18.4, 34.0)             | 0.60 (0.51, 0.97)       |
| <b>Kyrgyzstan</b>                     | 69.0 (10.4, 238.1)           | 1.24 (0.19, 4.29)     | 30.6 (24.7, 39.4)           | 0.50 (0.40, 0.64)       | 99.6 (40.1, 265.5)            | 1.74 (0.68, 4.74)       |
| <b>Laos</b>                           | 964.7 (343.7, 2,316.4)       | 13.89 (4.97, 33.08)   | 2,674.2 (1,268.5, 4,338.5)  | 30.28 (15.10, 48.79)    | 3,638.9 (2,023.9, 5,760.8)    | 44.17 (25.41, 70.14)    |
| <b>Latvia</b>                         | 0.0 (0.0, 0.0)               | 0.00 (0.00, 0.00)     | 9.3 (5.8, 10.9)             | 0.57 (0.33, 0.68)       | 9.3 (5.8, 10.9)               | 0.57 (0.33, 0.68)       |
| <b>Lebanon</b>                        | 0.0 (0.0, 0.0)               | 0.00 (0.00, 0.00)     | 26.5 (19.1, 33.5)           | 0.55 (0.41, 0.71)       | 26.5 (19.1, 33.5)             | 0.55 (0.41, 0.71)       |
| <b>Lesotho</b>                        | 0.0 (0.0, 0.0)               | 0.00 (0.00, 0.00)     | 14.3 (10.5, 20.6)           | 0.64 (0.46, 0.87)       | 14.3 (10.5, 20.6)             | 0.64 (0.46, 0.87)       |
| <b>Liberia</b>                        | 448.5 (156.3, 1,070.4)       | 10.13 (3.53, 23.94)   | 175.0 (89.7, 287.5)         | 3.14 (1.65, 5.77)       | 623.5 (315.0, 1,255.7)        | 13.27 (6.48, 27.13)     |
| <b>Libya</b>                          | 0.0 (0.0, 0.0)               | 0.00 (0.00, 0.00)     | 40.0 (33.0, 56.6)           | 0.61 (0.50, 0.86)       | 40.0 (33.0, 56.6)             | 0.61 (0.50, 0.86)       |
| <b>Lithuania</b>                      | 0.0 (0.0, 0.0)               | 0.00 (0.00, 0.00)     | 12.4 (8.4, 14.7)            | 0.50 (0.31, 0.61)       | 12.4 (8.4, 14.7)              | 0.50 (0.31, 0.61)       |
| <b>Luxembourg</b>                     | 0.0 (0.0, 0.0)               | 0.00 (0.00, 0.00)     | 2.8 (1.8, 3.3)              | 0.59 (0.36, 0.71)       | 2.8 (1.8, 3.3)                | 0.59 (0.36, 0.71)       |
| <b>Macedonia</b>                      | 0.0 (0.0, 0.0)               | 0.00 (0.00, 0.00)     | 11.0 (8.1, 13.3)            | 0.57 (0.40, 0.73)       | 11.0 (8.1, 13.3)              | 0.57 (0.40, 0.73)       |
| <b>Madagascar</b>                     | 609.3 (143.9, 1,840.7)       | 2.58 (0.61, 7.77)     | 172.0 (89.0, 287.0)         | 0.81 (0.34, 1.42)       | 781.3 (304.9, 2,000.6)        | 3.39 (1.37, 8.46)       |
| <b>Malawi</b>                         | 670.4 (184.5, 1,824.9)       | 3.95 (1.10, 10.69)    | 222.1 (162.5, 373.0)        | 1.29 (0.95, 1.64)       | 892.5 (400.1, 2,033.0)        | 5.24 (2.40, 11.96)      |
| <b>Malaysia</b>                       | 10,500.0 (3,219.2, 27,511.9) | 35.02 (10.82, 91.95)  | 8,242.8 (6,473.0, 10,118.4) | 27.36 (21.36, 33.58)    | 18,742.9 (11,410.7, 35,610.9) | 62.38 (37.93, 118.74)   |
| <b>Maldives</b>                       | 37.2 (13.0, 89.2)            | 10.65 (3.72, 25.52)   | 133.5 (74.5, 178.5)         | 36.33 (20.81, 48.26)    | 170.7 (105.9, 235.8)          | 46.98 (29.54, 65.26)    |
| <b>Mali</b>                           | 697.7 (194.8, 1,864.3)       | 4.43 (1.23, 11.94)    | 618.4 (307.4, 957.8)        | 2.48 (1.56, 3.57)       | 1,316.2 (717.3, 2,462.2)      | 6.91 (3.57, 14.35)      |
| <b>Malta</b>                          | 0.0 (0.0, 0.0)               | 0.00 (0.00, 0.00)     | 2.0 (1.4, 2.3)              | 0.53 (0.38, 0.64)       | 2.0 (1.4, 2.3)                | 0.53 (0.38, 0.64)       |
| <b>Marshall Islands</b>               | 17.2 (5.8, 42.4)             | 24.60 (8.30, 61.24)   | 70.4 (47.6, 120.1)          | 107.79 (78.30, 161.03)  | 87.5 (59.8, 139.7)            | 132.39 (94.67, 192.91)  |
| <b>Mauritania</b>                     | 93.6 (21.4, 280.2)           | 2.35 (0.54, 7.07)     | 56.2 (34.7, 88.1)           | 1.13 (0.71, 1.91)       | 149.8 (70.7, 333.4)           | 3.48 (1.56, 8.06)       |
| <b>Mauritius</b>                      | 314.7 (105.7, 773.0)         | 25.53 (8.64, 62.70)   | 77.6 (62.4, 115.2)          | 6.85 (5.36, 10.06)      | 392.3 (182.1, 849.2)          | 32.38 (15.29, 69.57)    |

|                                         |                              |                      |                              |                      |                               |                        |
|-----------------------------------------|------------------------------|----------------------|------------------------------|----------------------|-------------------------------|------------------------|
| <b>Mexico</b>                           | 6,445.0 (2,081.9, 16,361.6)  | 5.21 (1.68, 13.26)   | 2,157.3 (1,338.6, 2,358.2)   | 1.81 (1.11, 1.98)    | 8,602.3 (4,275.6, 18,598.8)   | 7.02 (3.53, 15.13)     |
| <b>Moldova</b>                          | 0.0 (0.0, 0.0)               | 0.00 (0.00, 0.00)    | 16.3 (11.9, 18.9)            | 0.51 (0.37, 0.60)    | 16.3 (11.9, 18.9)             | 0.51 (0.37, 0.60)      |
| <b>Mongolia</b>                         | 0.0 (0.0, 0.0)               | 0.00 (0.00, 0.00)    | 24.6 (19.2, 50.2)            | 0.80 (0.63, 1.60)    | 24.6 (19.2, 50.2)             | 0.80 (0.63, 1.60)      |
| <b>Montenegro</b>                       | 0.0 (0.0, 0.0)               | 0.00 (0.00, 0.00)    | 2.9 (2.2, 3.8)               | 0.50 (0.38, 0.67)    | 2.9 (2.2, 3.8)                | 0.50 (0.38, 0.67)      |
| <b>Morocco</b>                          | 0.0 (0.0, 0.0)               | 0.00 (0.00, 0.00)    | 195.8 (158.5, 270.0)         | 0.56 (0.45, 0.77)    | 195.8 (158.5, 270.0)          | 0.56 (0.45, 0.77)      |
| <b>Mozambique</b>                       | 916.5 (234.8, 2,449.4)       | 3.41 (0.88, 9.16)    | 295.7 (198.1, 394.2)         | 1.25 (0.68, 1.69)    | 1,212.2 (540.8, 2,750.8)      | 4.66 (2.07, 10.46)     |
| <b>Myanmar</b>                          | 5,667.4 (1,980.9, 13,877.0)  | 10.59 (3.72, 25.93)  | 10,962.6 (5,209.4, 16,698.0) | 20.96 (10.02, 31.99) | 16,630.0 (9,403.6, 26,230.9)  | 31.55 (17.85, 49.70)   |
| <b>Namibia</b>                          | 0.0 (0.0, 0.0)               | 0.00 (0.00, 0.00)    | 11.6 (9.1, 16.2)             | 0.49 (0.39, 0.65)    | 11.6 (9.1, 16.2)              | 0.49 (0.39, 0.65)      |
| <b>Nepal</b>                            | 2,195.9 (754.2, 5,454.0)     | 7.66 (2.62, 18.91)   | 925.1 (614.5, 1,684.2)       | 3.56 (2.41, 6.25)    | 3,121.0 (1,540.4, 6,393.8)    | 11.22 (5.79, 22.61)    |
| <b>Netherlands</b>                      | 0.0 (0.0, 0.0)               | 0.00 (0.00, 0.00)    | 77.3 (52.1, 87.9)            | 0.52 (0.34, 0.61)    | 77.3 (52.1, 87.9)             | 0.52 (0.34, 0.61)      |
| <b>New Zealand</b>                      | 0.0 (0.0, 0.0)               | 0.00 (0.00, 0.00)    | 20.9 (13.9, 24.2)            | 0.51 (0.33, 0.60)    | 20.9 (13.9, 24.2)             | 0.51 (0.33, 0.60)      |
| <b>Nicaragua</b>                        | 1,163.1 (407.5, 2,831.3)     | 18.58 (6.57, 45.14)  | 705.3 (531.7, 859.4)         | 10.52 (8.02, 12.77)  | 1,868.4 (1,090.0, 3,486.4)    | 29.10 (16.70, 55.16)   |
| <b>Niger</b>                            | 737.5 (205.5, 1,972.2)       | 4.04 (1.13, 10.86)   | 619.9 (359.0, 985.5)         | 2.09 (1.34, 3.15)    | 1,357.5 (750.1, 2,641.8)      | 6.13 (3.05, 13.14)     |
| <b>Nigeria</b>                          | 21,991.1 (7,740.9, 51,690.1) | 12.33 (4.43, 28.88)  | 12,560.9 (6,974.4, 20,382.6) | 4.72 (2.88, 7.15)    | 34,552.0 (17,773.1, 66,657.0) | 17.06 (8.48, 35.00)    |
| <b>North Korea</b>                      | 0.0 (0.0, 0.0)               | 0.00 (0.00, 0.00)    | 215.8 (143.9, 303.7)         | 0.88 (0.58, 1.22)    | 215.8 (143.9, 303.7)          | 0.88 (0.58, 1.22)      |
| <b>Norway</b>                           | 0.0 (0.0, 0.0)               | 0.00 (0.00, 0.00)    | 24.2 (16.3, 27.3)            | 0.53 (0.35, 0.60)    | 24.2 (16.3, 27.3)             | 0.53 (0.35, 0.60)      |
| <b>Oman</b>                             | 20.1 (3.2, 68.6)             | 0.56 (0.09, 1.90)    | 25.6 (19.8, 35.9)            | 0.72 (0.56, 1.07)    | 45.7 (26.6, 95.0)             | 1.28 (0.75, 2.63)      |
| <b>Pakistan</b>                         | 13,570.1 (4,419.4, 32,775.0) | 7.26 (2.37, 17.64)   | 9,498.7 (7,187.6, 16,994.8)  | 5.04 (3.84, 8.26)    | 23,068.8 (13,200.2, 42,665.9) | 12.30 (7.16, 22.84)    |
| <b>Palestine</b>                        | 0.0 (0.0, 0.0)               | 0.00 (0.00, 0.00)    | 27.6 (21.9, 35.9)            | 0.57 (0.45, 0.75)    | 27.6 (21.9, 35.9)             | 0.57 (0.45, 0.75)      |
| <b>Panama</b>                           | 659.1 (235.2, 1,623.2)       | 16.95 (6.03, 41.69)  | 204.6 (164.5, 338.0)         | 5.22 (4.22, 8.43)    | 863.7 (426.6, 1,819.9)        | 22.17 (10.98, 46.73)   |
| <b>Papua New Guinea</b>                 | 637.7 (220.1, 1,543.4)       | 8.50 (2.95, 20.49)   | 2,277.3 (1,329.9, 5,026.9)   | 30.20 (19.37, 62.68) | 2,915.0 (1,827.5, 5,881.5)    | 38.69 (26.10, 73.38)   |
| <b>Paraguay</b>                         | 1,079.8 (377.5, 2,623.6)     | 15.55 (5.42, 37.73)  | 654.1 (255.0, 808.0)         | 12.35 (4.12, 15.52)  | 1,733.9 (972.1, 3,276.6)      | 27.90 (15.23, 50.73)   |
| <b>Peru</b>                             | 2,103.8 (697.3, 5,122.7)     | 6.83 (2.27, 16.66)   | 1,178.0 (784.1, 2,195.9)     | 3.65 (2.45, 6.74)    | 3,281.8 (1,659.3, 6,451.9)    | 10.48 (5.29, 20.89)    |
| <b>Philippines</b>                      | 37,893 (11,544, 100,244)     | 37.68 (11.52, 99.53) | 92,036 (34,144, 124,524)     | 73.99 (27.52, 99.50) | 129,929 (68,567, 197,634)     | 111.67 (60.53, 177.13) |
| <b>Poland</b>                           | 0.0 (0.0, 0.0)               | 0.00 (0.00, 0.00)    | 184.7 (156.2, 309.2)         | 0.55 (0.45, 0.97)    | 184.7 (156.2, 309.2)          | 0.55 (0.45, 0.97)      |
| <b>Portugal</b>                         | 0.0 (0.0, 0.0)               | 0.00 (0.00, 0.00)    | 42.4 (30.5, 48.7)            | 0.47 (0.32, 0.54)    | 42.4 (30.5, 48.7)             | 0.47 (0.32, 0.54)      |
| <b>Qatar</b>                            | 0.0 (0.0, 0.0)               | 0.00 (0.00, 0.00)    | 12.4 (9.3, 15.0)             | 0.60 (0.47, 0.72)    | 12.4 (9.3, 15.0)              | 0.60 (0.47, 0.72)      |
| <b>Romania</b>                          | 0.0 (0.0, 0.0)               | 0.00 (0.00, 0.00)    | 120.9 (83.5, 339.7)          | 0.71 (0.44, 2.29)    | 120.9 (83.5, 339.7)           | 0.71 (0.44, 2.29)      |
| <b>Russia</b>                           | 0.0 (0.0, 0.0)               | 0.00 (0.00, 0.00)    | 734.9 (591.9, 1,024.0)       | 0.57 (0.45, 0.76)    | 734.9 (591.9, 1,024.0)        | 0.57 (0.45, 0.76)      |
| <b>Rwanda</b>                           | 269.8 (56.3, 807.6)          | 2.21 (0.47, 6.66)    | 92.7 (68.2, 131.3)           | 0.81 (0.48, 1.13)    | 362.4 (146.5, 885.7)          | 3.02 (1.24, 7.35)      |
| <b>Saint Lucia</b>                      | 52.7 (16.8, 136.0)           | 28.86 (9.25, 74.66)  | 17.0 (12.0, 24.4)            | 9.52 (6.57, 13.78)   | 69.7 (33.3, 150.5)            | 38.38 (18.39, 82.67)   |
| <b>Saint Vincent and the Grenadines</b> | 21.0 (7.2, 50.0)             | 19.03 (6.57, 45.47)  | 12.6 (9.1, 19.1)             | 11.57 (8.31, 17.71)  | 33.5 (19.3, 63.3)             | 30.61 (17.69, 57.65)   |
| <b>Samoa</b>                            | 18.0 (6.3, 43.0)             | 9.24 (3.18, 22.20)   | 48.3 (26.9, 101.2)           | 29.47 (18.05, 55.79) | 66.4 (38.8, 122.9)            | 38.71 (24.57, 66.79)   |
| <b>Sao Tome and Principe</b>            | 18.9 (6.6, 46.5)             | 9.54 (3.36, 23.76)   | 6.3 (2.9, 11.4)              | 2.59 (1.19, 5.06)    | 25.2 (12.1, 52.9)             | 12.13 (5.63, 26.27)    |
| <b>Saudi Arabia</b>                     | 105.6 (14.7, 377.4)          | 0.37 (0.05, 1.32)    | 271.9 (202.6, 324.4)         | 0.89 (0.66, 1.07)    | 377.4 (262.5, 650.2)          | 1.26 (0.87, 2.20)      |
| <b>Senegal</b>                          | 1,151.6 (388.6, 2,826.7)     | 7.92 (2.70, 19.55)   | 521.7 (337.1, 819.2)         | 2.80 (1.84, 4.81)    | 1,673.3 (876.9, 3,355.4)      | 10.72 (5.29, 22.35)    |
| <b>Serbia</b>                           | 0.0 (0.0, 0.0)               | 0.00 (0.00, 0.00)    | 43.9 (33.6, 51.6)            | 0.52 (0.39, 0.63)    | 43.9 (33.6, 51.6)             | 0.52 (0.39, 0.63)      |
| <b>Seychelles</b>                       | 13.6 (4.8, 32.7)             | 14.76 (5.24, 35.53)  | 16.1 (11.7, 23.3)            | 18.51 (13.40, 27.12) | 29.7 (19.1, 49.3)             | 33.27 (21.64, 54.18)   |
| <b>Sierra Leone</b>                     | 698.1 (246.1, 1,702.0)       | 11.07 (3.99, 27.18)  | 474.7 (250.0, 743.0)         | 5.47 (3.25, 8.00)    | 1,172.7 (665.5, 2,190.5)      | 16.55 (9.14, 32.52)    |
| <b>Singapore</b>                        | 145.3 (22.6, 498.2)          | 3.83 (0.60, 13.09)   | 37.2 (30.1, 52.6)            | 1.05 (0.84, 1.49)    | 182.5 (60.5, 533.8)           | 4.88 (1.68, 14.08)     |
| <b>Slovakia</b>                         | 0.0 (0.0, 0.0)               | 0.00 (0.00, 0.00)    | 25.0 (18.7, 31.2)            | 0.51 (0.38, 0.67)    | 25.0 (18.7, 31.2)             | 0.51 (0.38, 0.67)      |
| <b>Slovenia</b>                         | 0.0 (0.0, 0.0)               | 0.00 (0.00, 0.00)    | 8.8 (5.5, 11.0)              | 0.50 (0.30, 0.66)    | 8.8 (5.5, 11.0)               | 0.50 (0.30, 0.66)      |
| <b>Solomon Islands</b>                  | 78.5 (27.8, 189.5)           | 13.57 (4.86, 32.53)  | 295.1 (174.1, 529.0)         | 61.26 (37.64, 98.01) | 373.6 (232.2, 621.2)          | 74.83 (47.78, 115.39)  |
| <b>Somalia</b>                          | 252.4 (55.9, 759.6)          | 2.32 (0.52, 6.95)    | 102.9 (69.2, 175.0)          | 0.97 (0.58, 1.59)    | 355.3 (151.7, 866.1)          | 3.29 (1.39, 8.02)      |
| <b>South Africa</b>                     | 0.0 (0.0, 0.0)               | 0.00 (0.00, 0.00)    | 242.9 (188.2, 385.8)         | 0.43 (0.34, 0.68)    | 242.9 (188.2, 385.8)          | 0.43 (0.34, 0.68)      |
| <b>South Korea</b>                      | 0.0 (0.0, 0.0)               | 0.00 (0.00, 0.00)    | 222.5 (162.8, 262.9)         | 0.51 (0.36, 0.59)    | 222.5 (162.8, 262.9)          | 0.51 (0.36, 0.59)      |
| <b>South Sudan</b>                      | 210.9 (41.3, 665.3)          | 1.81 (0.36, 5.62)    | 107.8 (78.9, 153.8)          | 0.96 (0.67, 1.21)    | 318.7 (137.4, 770.5)          | 2.77 (1.24, 6.62)      |
| <b>Spain</b>                            | 0.0 (0.0, 0.0)               | 0.00 (0.00, 0.00)    | 206.0 (134.6, 234.2)         | 0.51 (0.32, 0.58)    | 206.0 (134.6, 234.2)          | 0.51 (0.32, 0.58)      |
| <b>Sri Lanka</b>                        | 6,675.8 (2,121.3, 17,162.1)  | 31.59 (10.07, 81.37) | 6,422.7 (2,757.3, 8,529.1)   | 30.58 (13.15, 40.61) | 13,098.4 (7,732.5, 23,352.0)  | 62.17 (36.74, 110.72)  |
| <b>Sudan</b>                            | 1,765.4 (534.7, 4,555.6)     | 4.48 (1.37, 11.57)   | 805.9 (526.1, 1,130.9)       | 1.72 (1.16, 2.39)    | 2,571.4 (1,285.0, 5,332.2)    | 6.21 (2.99, 13.35)     |
| <b>Suriname</b>                         | 135.2 (45.1, 335.6)          | 24.93 (8.32, 61.96)  | 97.2 (65.6, 122.2)           | 17.96 (12.03, 22.59) | 232.4 (139.5, 435.0)          | 42.89 (25.77, 80.40)   |
| <b>Swaziland</b>                        | 0.0 (0.0, 0.0)               | 0.00 (0.00, 0.00)    | 8.9 (6.3, 13.5)              | 0.66 (0.45, 0.93)    | 8.9 (6.3, 13.5)               | 0.66 (0.45, 0.93)      |
| <b>Sweden</b>                           | 0.0 (0.0, 0.0)               | 0.00 (0.00, 0.00)    | 42.4 (28.1, 49.3)            | 0.51 (0.33, 0.60)    | 42.4 (28.1, 49.3)             | 0.51 (0.33, 0.60)      |
| <b>Switzerland</b>                      | 0.0 (0.0, 0.0)               | 0.00 (0.00, 0.00)    | 32.2 (20.1, 37.0)            | 0.47 (0.29, 0.54)    | 32.2 (20.1, 37.0)             | 0.47 (0.29, 0.54)      |

|                             |                              |                     |                              |                        |                               |                        |
|-----------------------------|------------------------------|---------------------|------------------------------|------------------------|-------------------------------|------------------------|
| <b>Syria</b>                | 478.8 (103.7, 1,441.8)       | 2.13 (0.46, 6.49)   | 178.8 (120.2, 291.2)         | 0.83 (0.56, 1.27)      | 657.6 (274.7, 1,648.4)        | 2.96 (1.27, 7.33)      |
| <b>Taiwan</b>               | 1,749.6 (577.2, 4,386.6)     | 7.63 (2.53, 19.11)  | 172.8 (147.1, 224.1)         | 0.83 (0.70, 1.10)      | 1,922.3 (748.3, 4,560.9)      | 8.46 (3.33, 19.98)     |
| <b>Tajikistan</b>           | 219.8 (52.0, 638.4)          | 2.62 (0.62, 7.69)   | 92.8 (72.9, 130.0)           | 0.88 (0.70, 1.21)      | 312.6 (142.2, 722.3)          | 3.51 (1.50, 8.43)      |
| <b>Tanzania</b>             | 1,742.3 (489.2, 4,862.0)     | 3.44 (0.95, 9.71)   | 742.5 (513.3, 1,013.9)       | 1.21 (0.83, 1.53)      | 2,484.8 (1,200.5, 5,599.8)    | 4.65 (2.14, 10.89)     |
| <b>Thailand</b>             | 16,313.9 (5,399.0, 40,378.9) | 24.82 (8.23, 61.19) | 11,292.0 (8,747.7, 19,652.1) | 22.29 (16.97, 39.60)   | 27,605.9 (15,800.4, 51,123.6) | 47.10 (28.61, 82.69)   |
| <b>The Bahamas</b>          | 19.8 (2.9, 71.5)             | 5.29 (0.77, 19.04)  | 37.2 (27.2, 50.8)            | 9.99 (7.22, 13.93)     | 56.9 (35.6, 108.9)            | 15.28 (9.56, 29.42)    |
| <b>The Gambia</b>           | 211.9 (74.0, 511.3)          | 11.09 (3.92, 26.98) | 85.8 (49.4, 131.2)           | 3.32 (1.89, 5.45)      | 297.7 (152.0, 596.0)          | 14.42 (6.80, 30.22)    |
| <b>Timor-Leste</b>          | 96.9 (32.7, 235.3)           | 8.17 (2.84, 19.88)  | 315.9 (203.5, 444.7)         | 16.91 (11.32, 23.28)   | 412.8 (282.1, 582.2)          | 25.08 (16.95, 37.74)   |
| <b>Togo</b>                 | 601.9 (207.7, 1,475.5)       | 8.60 (2.99, 20.80)  | 326.9 (194.4, 518.0)         | 3.43 (2.09, 5.13)      | 928.9 (502.8, 1,775.3)        | 12.03 (6.07, 24.24)    |
| <b>Tonga</b>                | 25.3 (8.6, 62.1)             | 23.42 (7.90, 57.59) | 153.9 (69.3, 243.0)          | 142.28 (62.06, 204.09) | 179.2 (94.2, 274.9)           | 165.70 (84.85, 241.00) |
| <b>Trinidad and Tobago</b>  | 85.6 (11.6, 305.9)           | 6.47 (0.88, 23.08)  | 145.0 (107.3, 200.0)         | 11.15 (8.03, 16.05)    | 230.6 (144.1, 449.2)          | 17.61 (10.86, 33.96)   |
| <b>Tunisia</b>              | 0.0 (0.0, 0.0)               | 0.00 (0.00, 0.00)   | 55.8 (44.2, 73.8)            | 0.50 (0.40, 0.66)      | 55.8 (44.2, 73.8)             | 0.50 (0.40, 0.66)      |
| <b>Turkey</b>               | 0.0 (0.0, 0.0)               | 0.00 (0.00, 0.00)   | 449.4 (371.8, 611.4)         | 0.59 (0.48, 0.79)      | 449.4 (371.8, 611.4)          | 0.59 (0.48, 0.79)      |
| <b>Turkmenistan</b>         | 205.4 (54.5, 570.2)          | 3.87 (1.03, 10.77)  | 225.9 (145.6, 312.4)         | 3.89 (2.48, 5.36)      | 431.3 (263.3, 795.5)          | 7.75 (4.67, 14.58)     |
| <b>Uganda</b>               | 2,151.8 (645.5, 5,319.5)     | 5.49 (1.69, 13.82)  | 632.6 (500.7, 944.1)         | 1.71 (1.23, 2.10)      | 2,784.4 (1,240.8, 5,959.1)    | 7.20 (3.34, 15.67)     |
| <b>Ukraine</b>              | 0.0 (0.0, 0.0)               | 0.00 (0.00, 0.00)   | 207.0 (155.3, 244.7)         | 0.52 (0.38, 0.62)      | 207.0 (155.3, 244.7)          | 0.52 (0.38, 0.62)      |
| <b>United Arab Emirates</b> | 0.0 (0.0, 0.0)               | 0.00 (0.00, 0.00)   | 66.1 (48.2, 99.8)            | 0.62 (0.46, 0.89)      | 66.1 (48.2, 99.8)             | 0.62 (0.46, 0.89)      |
| <b>United Kingdom</b>       | 0.0 (0.0, 0.0)               | 0.00 (0.00, 0.00)   | 272.4 (186.1, 302.9)         | 0.49 (0.33, 0.55)      | 272.4 (186.1, 302.9)          | 0.49 (0.33, 0.55)      |
| <b>United States</b>        | 522.0 (51.8, 2,005.3)        | 0.17 (0.02, 0.64)   | 1,505.6 (1,104.3, 1,761.2)   | 0.52 (0.38, 0.62)      | 2,027.6 (1,407.7, 3,489.9)    | 0.69 (0.48, 1.15)      |
| <b>Uruguay</b>              | 0.0 (0.0, 0.0)               | 0.00 (0.00, 0.00)   | 25.8 (17.2, 70.5)            | 0.82 (0.53, 2.26)      | 25.8 (17.2, 70.5)             | 0.82 (0.53, 2.26)      |
| <b>Uzbekistan</b>           | 415.7 (74.5, 1,319.6)        | 1.42 (0.26, 4.56)   | 172.8 (139.8, 266.3)         | 0.55 (0.45, 0.84)      | 588.5 (235.4, 1,487.7)        | 1.97 (0.77, 5.09)      |
| <b>Vanuatu</b>              | 24.8 (8.6, 60.6)             | 9.64 (3.36, 23.56)  | 112.1 (70.7, 189.5)          | 47.77 (31.69, 79.61)   | 136.9 (90.7, 220.7)           | 57.41 (39.67, 88.51)   |
| <b>Venezuela</b>            | 4,809.4 (1,684.7, 11,645.6)  | 15.68 (5.50, 38.11) | 2,528.7 (1,805.5, 3,011.7)   | 8.07 (5.77, 9.57)      | 7,338.1 (4,225.1, 14,023.8)   | 23.75 (13.63, 45.60)   |
| <b>Vietnam</b>              | 21,876.6 (7,514.5, 54,110.9) | 23.90 (8.20, 59.02) | 18,007.8 (9,373.5, 27,202.0) | 21.38 (10.89, 32.21)   | 39,884.4 (22,570.5, 73,759.7) | 45.27 (26.02, 82.35)   |
| <b>Yemen</b>                | 1,049.4 (305.1, 2,885.0)     | 4.13 (1.21, 11.29)  | 440.3 (251.8, 690.0)         | 1.55 (0.88, 2.50)      | 1,489.7 (705.0, 3,326.2)      | 5.68 (2.62, 13.02)     |
| <b>Zambia</b>               | 401.5 (96.7, 1,156.0)        | 2.66 (0.62, 7.76)   | 141.0 (104.9, 222.5)         | 1.00 (0.72, 1.24)      | 542.5 (231.9, 1,297.6)        | 3.66 (1.62, 8.50)      |
| <b>Zimbabwe</b>             | 413.2 (101.5, 1,197.2)       | 2.80 (0.70, 7.99)   | 90.7 (59.7, 216.0)           | 0.54 (0.36, 1.26)      | 503.9 (184.2, 1,276.2)        | 3.34 (1.20, 8.46)      |

### Years of Dengue Mortality Data

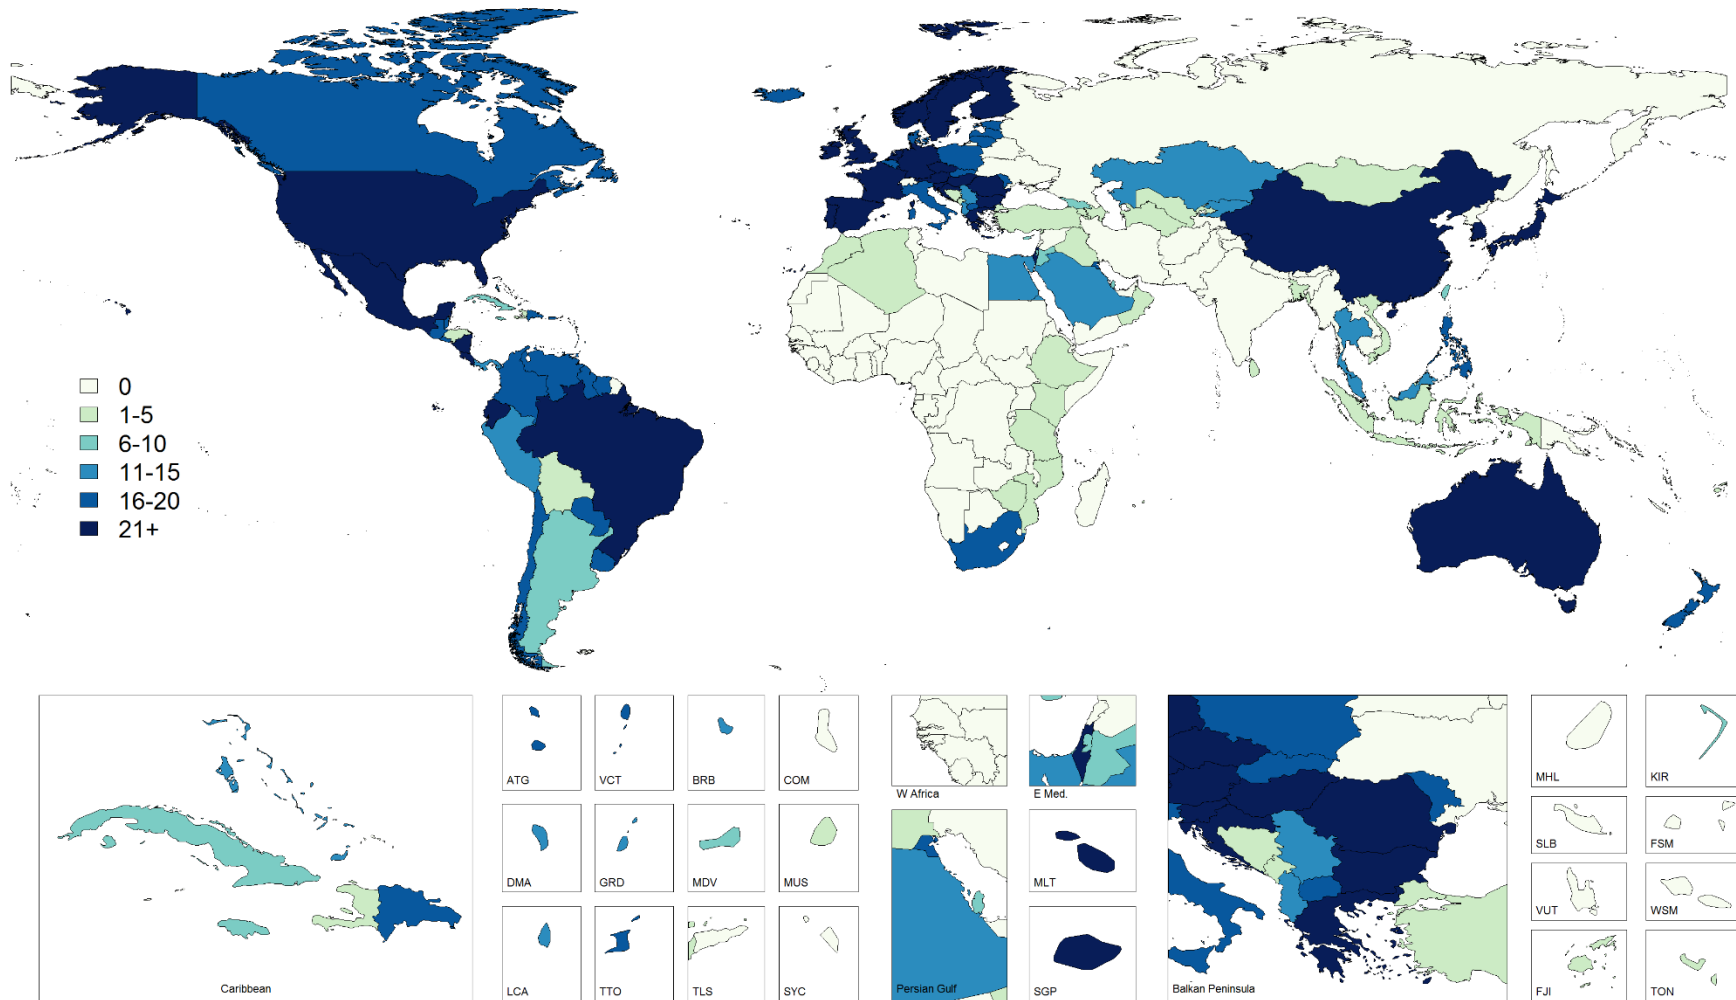

Figure S3: The number of years of dengue mortality data, by country

## Years of Case Notification Data

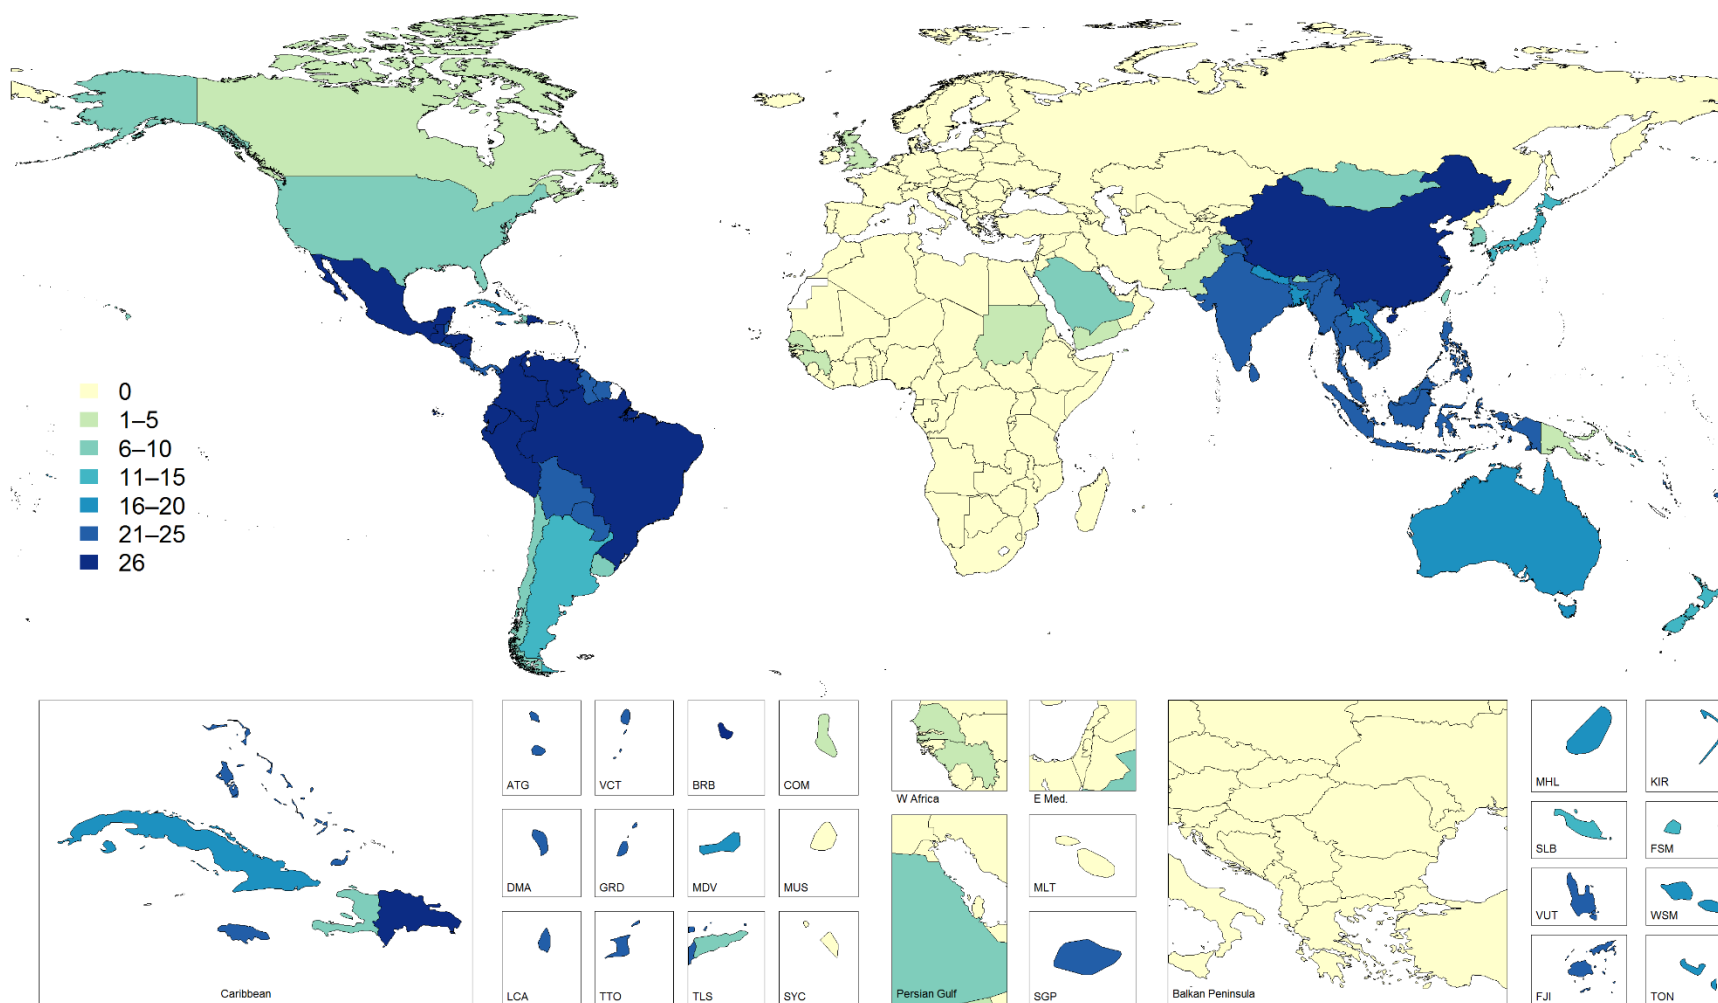

Figure S4: The number of years of dengue case notification data, by country



## Antigua and Barbuda

Pan American Health Organization (PAHO). Number of Reported Cases of Dengue and Severe Dengue (DS) in the Americas, by Country 2008. Pan American Health Organization (PAHO).

Pan American Health Organization (PAHO). Number of Reported Cases of Dengue and Severe Dengue (DS) in the Americas, by Country 2009. Pan American Health Organization (PAHO).

Pan American Health Organization (PAHO). Number of Reported Cases of Dengue and Severe Dengue (DS) in the Americas, by Country 2010. Pan American Health Organization (PAHO).

Pan American Health Organization (PAHO). Number of Reported Cases of Dengue and Severe Dengue (DS) in the Americas, by Country 2011. Pan American Health Organization (PAHO).

Pan American Health Organization (PAHO). Number of Reported Cases of Dengue and Severe Dengue (DS) in the Americas, by Country 2012. Pan American Health Organization (PAHO).

Pan American Health Organization (PAHO). Number of Reported Cases of Dengue and Severe Dengue (DS) in the Americas, by Country 2013. Pan American Health Organization (PAHO).

World Health Organization (WHO). WHO DengueNet. Geneva, Switzerland: World Health Organization (WHO).

## Argentina

Pan American Health Organization (PAHO). Number of Reported Cases of Dengue and Dengue Hemorrhagic Fever (DHF) in the Americas, by Country 2003. Pan American Health Organization (PAHO).

Pan American Health Organization (PAHO). Number of Reported Cases of Dengue and Dengue Hemorrhagic Fever (DHF) in the Americas, by Country 2004. Pan American Health Organization (PAHO).

Pan American Health Organization (PAHO). Number of Reported Cases of Dengue and Dengue Hemorrhagic Fever (DHF) in the Americas, by Country 2005. Pan American Health Organization (PAHO).

Pan American Health Organization (PAHO). Number of Reported Cases of Dengue and Dengue Hemorrhagic Fever (DHF) in the Americas, by Country 2006. Pan American Health Organization (PAHO).

Pan American Health Organization (PAHO). Number of Reported Cases of Dengue and Dengue Hemorrhagic Fever (DHF) in the Americas, by Country 2007. Pan American Health Organization (PAHO).

Pan American Health Organization (PAHO). Number of Reported Cases of Dengue and Severe Dengue (DS) in the Americas, by Country 2008. Pan American Health Organization (PAHO).

Pan American Health Organization (PAHO). Number of Reported Cases of Dengue and Severe Dengue (DS) in the Americas, by Country 2009. Pan American Health Organization (PAHO).

Pan American Health Organization (PAHO). Number of Reported Cases of Dengue and Severe Dengue (DS) in the Americas, by Country 2010. Pan American Health Organization (PAHO).

Pan American Health Organization (PAHO). Number of Reported Cases of Dengue and Severe Dengue (DS) in the Americas, by Country 2011. Pan American Health Organization (PAHO).

Pan American Health Organization (PAHO). Number of Reported Cases of Dengue and Severe Dengue (DS) in the Americas, by Country 2012. Pan American Health Organization (PAHO).

Pan American Health Organization (PAHO). Number of Reported Cases of Dengue and Severe Dengue (DS) in the Americas, by Country 2013. Pan American Health Organization (PAHO).

World Health Organization (WHO). WHO DengueNet. Geneva, Switzerland: World Health Organization (WHO).

## Australia

World Health Organization (WHO). WHO DengueNet. Geneva, Switzerland: World Health Organization (WHO).

World Health Organization Regional Office for the Western Pacific. Number of Reported Cases of Dengue Fever and Dengue Hemorrhagic Fever in the Western Pacific Region, by Country 2000.

World Health Organization Regional Office for the Western Pacific. Number of Reported Cases of Dengue Fever and Dengue Hemorrhagic Fever in the Western Pacific Region, by Country 2001.

World Health Organization Regional Office for the Western Pacific. Number of Reported Cases of Dengue Fever and Dengue Hemorrhagic Fever in the Western Pacific Region, by Country 2002.

World Health Organization Regional Office for the Western Pacific. Number of Reported Cases of Dengue Fever and Dengue Hemorrhagic Fever in the Western Pacific Region, by Country 2003.

World Health Organization Regional Office for the Western Pacific. Number of Reported Cases of Dengue Fever and Dengue Hemorrhagic Fever in the Western Pacific Region, by Country 2004.

World Health Organization Regional Office for the Western Pacific. Number of Reported Cases of Dengue Fever and Dengue Hemorrhagic Fever in the Western Pacific Region, by Country 2005.

World Health Organization Regional Office for the Western Pacific. Number of Reported Cases of Dengue Fever and Dengue Hemorrhagic Fever in the Western Pacific Region, by Country 2006.

World Health Organization Regional Office for the Western Pacific. Number of Reported Cases of Dengue Fever and Dengue Hemorrhagic Fever in the Western Pacific Region, by Country 2007.

World Health Organization Regional Office for the Western Pacific. Number of Reported Cases of Dengue Fever and Dengue Hemorrhagic Fever in the Western Pacific Region, by Country 2008.

World Health Organization Regional Office for the Western Pacific. Number of Reported Cases of Dengue Fever and Dengue Hemorrhagic Fever in the Western Pacific Region, by Country 2009.

World Health Organization Regional Office for the Western Pacific. Number of Reported Cases of Dengue Fever and Dengue Hemorrhagic Fever in the Western Pacific Region, by Country 2010.

## Bangladesh

WHO Regional Office for South-East Asia (SEARO). WHO South-East Asia Region: Reported Cases and Deaths of Dengue from 2003 to 2012. New Delhi, India: WHO Regional Office for South-East Asia (SEARO), 2013.

World Health Organization (WHO). WHO DengueNet. Geneva, Switzerland: World Health Organization (WHO).

World Health Organization Regional Office for South-East Asia (SEARO). Situation Update of Dengue in the SEA Region, 2010. New Delhi, India: World Health Organization Regional Office for South-East Asia (SEARO).

## Barbados

Ministry of Health (Barbados). Barbados Annual Communicable Disease Surveillance Report 2009. St. Michael, Barbados: Ministry of Health (Barbados), 2011.

Pan American Health Organization (PAHO). Number of Reported Cases of Dengue and Severe Dengue (DS) in the Americas, by Country 2008. Pan American Health Organization (PAHO).

Pan American Health Organization (PAHO). Number of Reported Cases of Dengue and Severe Dengue (DS) in the Americas, by Country 2009. Pan American Health Organization (PAHO).

Pan American Health Organization (PAHO). Number of Reported Cases of Dengue and Severe Dengue (DS) in the Americas, by Country 2010. Pan American Health Organization (PAHO).

Pan American Health Organization (PAHO). Number of Reported Cases of Dengue and Severe Dengue (DS) in the Americas, by Country 2011. Pan American Health Organization (PAHO).

Pan American Health Organization (PAHO). Number of Reported Cases of Dengue and Severe Dengue (DS) in the Americas, by Country 2012. Pan American Health Organization (PAHO).

Pan American Health Organization (PAHO). Number of Reported Cases of Dengue and Severe Dengue (DS) in the Americas, by Country 2013. Pan American Health Organization (PAHO).

World Health Organization (WHO). WHO DengueNet. Geneva, Switzerland: World Health Organization (WHO).

## Belize

Pan American Health Organization (PAHO). Number of Reported Cases of Dengue and Severe Dengue (DS) in the Americas, by Country 2008. Pan American Health Organization (PAHO).

Pan American Health Organization (PAHO). Number of Reported Cases of Dengue and Severe Dengue (DS) in the Americas, by Country 2009. Pan American Health Organization (PAHO).

Pan American Health Organization (PAHO). Number of Reported Cases of Dengue and Severe Dengue (DS) in the Americas, by Country 2010. Pan American Health Organization (PAHO).

Pan American Health Organization (PAHO). Number of Reported Cases of Dengue and Severe Dengue (DS) in the Americas, by Country 2011. Pan American Health Organization (PAHO).

Pan American Health Organization (PAHO). Number of Reported Cases of Dengue and Severe Dengue (DS) in the Americas, by Country 2012. Pan American Health Organization (PAHO).

Pan American Health Organization (PAHO). Number of Reported Cases of Dengue and Severe Dengue (DS) in the Americas, by Country 2013. Pan American Health Organization (PAHO).

World Health Organization (WHO). WHO DengueNet. Geneva, Switzerland: World Health Organization (WHO).

## Bhutan

WHO Regional Office for South-East Asia (SEARO). WHO South-East Asia Region: Reported Cases and Deaths of Dengue from 2003 to 2012. New Delhi, India: WHO Regional Office for South-East Asia (SEARO), 2013.

World Health Organization Regional Office for South-East Asia (SEARO). Reported Cases of DF/DHF in Selected Countries in SEA Region. New Delhi, India: World Health Organization Regional Office for South-East Asia (SEARO).

World Health Organization Regional Office for South-East Asia (SEARO). Situation Update of Dengue in the SEA Region, 2010. New Delhi, India: World Health Organization Regional Office for South-East Asia (SEARO).

## Bolivia

Pan American Health Organization (PAHO). Number of Reported Cases of Dengue and Dengue Hemorrhagic Fever (DHF) in the Americas, by Country 2003. Pan American Health Organization (PAHO).

Pan American Health Organization (PAHO). Number of Reported Cases of Dengue and Dengue Hemorrhagic Fever (DHF) in the Americas, by Country 2004. Pan American Health Organization (PAHO).

Pan American Health Organization (PAHO). Number of Reported Cases of Dengue and Dengue Hemorrhagic Fever (DHF) in the Americas, by Country 2005. Pan American Health Organization (PAHO).

Pan American Health Organization (PAHO). Number of Reported Cases of Dengue and Dengue Hemorrhagic Fever (DHF) in the Americas, by Country 2006. Pan American Health Organization (PAHO).

Pan American Health Organization (PAHO). Number of Reported Cases of Dengue and Dengue Hemorrhagic Fever (DHF) in the Americas, by Country 2007. Pan American Health Organization (PAHO).

Pan American Health Organization (PAHO). Number of Reported Cases of Dengue and Severe Dengue (DS) in the Americas, by Country 2008. Pan American Health Organization (PAHO).

Pan American Health Organization (PAHO). Number of Reported Cases of Dengue and Severe Dengue (DS) in the Americas, by Country 2009. Pan American Health Organization (PAHO).

Pan American Health Organization (PAHO). Number of Reported Cases of Dengue and Severe Dengue (DS) in the Americas, by Country 2010. Pan American Health Organization (PAHO).

Pan American Health Organization (PAHO). Number of Reported Cases of Dengue and Severe Dengue (DS) in the Americas, by Country 2011. Pan American Health Organization (PAHO).

Pan American Health Organization (PAHO). Number of Reported Cases of Dengue and Severe Dengue (DS) in the Americas, by Country 2012. Pan American Health Organization (PAHO).

Pan American Health Organization (PAHO). Number of Reported Cases of Dengue and Severe Dengue (DS) in the Americas, by Country 2013. Pan American Health Organization (PAHO).

WHO Department of Communicable Disease Surveillance and Response. WHO Report on Global Surveillance of Epidemic-prone Infectious Diseases 2000.

World Health Organization (WHO). WHO DengueNet. Geneva, Switzerland: World Health Organization (WHO).

## Brazil

Pan American Health Organization (PAHO). Number of Reported Cases of Dengue and Dengue Hemorrhagic Fever (DHF) in the Americas, by Country 2003. Pan American Health Organization (PAHO).

Pan American Health Organization (PAHO). Number of Reported Cases of Dengue and Dengue Hemorrhagic Fever (DHF) in the Americas, by Country 2004. Pan American Health Organization (PAHO).

Pan American Health Organization (PAHO). Number of Reported Cases of Dengue and Dengue Hemorrhagic Fever (DHF) in the Americas, by Country 2005. Pan American Health Organization (PAHO).

Pan American Health Organization (PAHO). Number of Reported Cases of Dengue and Dengue Hemorrhagic Fever (DHF) in the Americas, by Country 2006. Pan American Health Organization (PAHO).

Pan American Health Organization (PAHO). Number of Reported Cases of Dengue and Dengue Hemorrhagic Fever (DHF) in the Americas, by Country 2007. Pan American Health Organization (PAHO).

Pan American Health Organization (PAHO). Number of Reported Cases of Dengue and Severe Dengue (DS) in the Americas, by Country 2008. Pan American Health Organization (PAHO).

Pan American Health Organization (PAHO). Number of Reported Cases of Dengue and Severe Dengue (DS) in the Americas, by Country 2009. Pan American Health Organization (PAHO).

Pan American Health Organization (PAHO). Number of Reported Cases of Dengue and Severe Dengue (DS) in the Americas, by Country 2010. Pan American Health Organization (PAHO).

Pan American Health Organization (PAHO). Number of Reported Cases of Dengue and Severe Dengue (DS) in the Americas, by Country 2011. Pan American Health Organization (PAHO).

Pan American Health Organization (PAHO). Number of Reported Cases of Dengue and Severe Dengue (DS) in the Americas, by Country 2012. Pan American Health Organization (PAHO).

Pan American Health Organization (PAHO). Number of Reported Cases of Dengue and Severe Dengue (DS) in the Americas, by Country 2013. Pan American Health Organization (PAHO).

World Health Organization (WHO). WHO DengueNet. Geneva, Switzerland: World Health Organization (WHO).

## Brunei

World Health Organization Regional Office for the Western Pacific. Number of Reported Cases of Dengue Fever and Dengue Hemorrhagic Fever in the Western Pacific Region, by Country 2000.

World Health Organization Regional Office for the Western Pacific. Number of Reported Cases of Dengue Fever and Dengue Hemorrhagic Fever in the Western Pacific Region, by Country 2001.

World Health Organization Regional Office for the Western Pacific. Number of Reported Cases of Dengue Fever and Dengue Hemorrhagic Fever in the Western Pacific Region, by Country 2002.

World Health Organization Regional Office for the Western Pacific. Number of Reported Cases of Dengue Fever and Dengue Hemorrhagic Fever in the Western Pacific Region, by Country 2003.

World Health Organization Regional Office for the Western Pacific. Number of Reported Cases of Dengue Fever and Dengue Hemorrhagic Fever in the Western Pacific Region, by Country 2004.

World Health Organization Regional Office for the Western Pacific. Number of Reported Cases of Dengue Fever and Dengue Hemorrhagic Fever in the Western Pacific Region, by Country 2005.

World Health Organization Regional Office for the Western Pacific. Number of Reported Cases of Dengue Fever and Dengue Hemorrhagic Fever in the Western Pacific Region, by Country 2006.

World Health Organization Regional Office for the Western Pacific. Number of Reported Cases of Dengue Fever and Dengue Hemorrhagic Fever in the Western Pacific Region, by Country 2007.

World Health Organization Regional Office for the Western Pacific. Number of Reported Cases of Dengue Fever and Dengue Hemorrhagic Fever in the Western Pacific Region, by Country 2008.

World Health Organization Regional Office for the Western Pacific. Number of Reported Cases of Dengue Fever and Dengue Hemorrhagic Fever in the Western Pacific Region, by Country 2009.

World Health Organization Regional Office for the Western Pacific. Number of Reported Cases of Dengue Fever and Dengue Hemorrhagic Fever in the Western Pacific Region, by Country 2010.

## Cambodia

World Health Organization (WHO). WHO DengueNet. Geneva, Switzerland: World Health Organization (WHO).

World Health Organization Regional Office for the Western Pacific. Number of Reported Cases of Dengue Fever and Dengue Hemorrhagic Fever in the Western Pacific Region, by Country 2000.

World Health Organization Regional Office for the Western Pacific. Number of Reported Cases of Dengue Fever and Dengue Hemorrhagic Fever in the Western Pacific Region, by Country 2001.

World Health Organization Regional Office for the Western Pacific. Number of Reported Cases of Dengue Fever and Dengue Hemorrhagic Fever in the Western Pacific Region, by Country 2002.

World Health Organization Regional Office for the Western Pacific. Number of Reported Cases of Dengue Fever and Dengue Hemorrhagic Fever in the Western Pacific Region, by Country 2003.

World Health Organization Regional Office for the Western Pacific. Number of Reported Cases of Dengue Fever and Dengue Hemorrhagic Fever in the Western Pacific Region, by Country 2004.

World Health Organization Regional Office for the Western Pacific. Number of Reported Cases of Dengue Fever and Dengue Hemorrhagic Fever in the Western Pacific Region, by Country 2005.

World Health Organization Regional Office for the Western Pacific. Number of Reported Cases of Dengue Fever and Dengue Hemorrhagic Fever in the Western Pacific Region, by Country 2006.

World Health Organization Regional Office for the Western Pacific. Number of Reported Cases of Dengue Fever and Dengue Hemorrhagic Fever in the Western Pacific Region, by Country 2007.

World Health Organization Regional Office for the Western Pacific. Number of Reported Cases of Dengue Fever and Dengue Hemorrhagic Fever in the Western Pacific Region, by Country 2008.

World Health Organization Regional Office for the Western Pacific. Number of Reported Cases of Dengue Fever and Dengue Hemorrhagic Fever in the Western Pacific Region, by Country 2009.

World Health Organization Regional Office for the Western Pacific. Number of Reported Cases of Dengue Fever and Dengue Hemorrhagic Fever in the Western Pacific Region, by Country 2010.

## Canada

Pan American Health Organization (PAHO). Number of Reported Cases of Dengue and Severe Dengue (DS) in the Americas, by Country 2009. Pan American Health Organization (PAHO).

Pan American Health Organization (PAHO). Number of Reported Cases of Dengue and Severe Dengue (DS) in the Americas, by Country 2010. Pan American Health Organization (PAHO).

Pan American Health Organization (PAHO). Number of Reported Cases of Dengue and Severe Dengue (DS) in the Americas, by Country 2012. Pan American Health Organization (PAHO).

Pan American Health Organization (PAHO). Number of Reported Cases of Dengue and Severe Dengue (DS) in the Americas, by Country 2013. Pan American Health Organization (PAHO).

## Cape Verde

Franco L, Di Caro A, Carletti F, Vapalahti O, Renaudat C, Zeller H, Tenorio A. Recent expansion of dengue virus serotype 3 in West Africa. *Euro Surveill* [Internet]. 2010 Feb 18; 15(7): 19490. Available from: <http://www.eurosurveillance.org/ViewArticle.aspx?ArticleId=19490>

## Chile

Pan American Health Organization (PAHO). Number of Reported Cases of Dengue and Severe Dengue (DS) in the Americas, by Country 2008. Pan American Health Organization (PAHO).

Pan American Health Organization (PAHO). Number of Reported Cases of Dengue and Severe Dengue (DS) in the Americas, by Country 2009. Pan American Health Organization (PAHO).

Pan American Health Organization (PAHO). Number of Reported Cases of Dengue and Severe Dengue (DS) in the Americas, by Country 2010. Pan American Health Organization (PAHO).

Pan American Health Organization (PAHO). Number of Reported Cases of Dengue and Severe Dengue (DS) in the Americas, by Country 2011. Pan American Health Organization (PAHO).

Pan American Health Organization (PAHO). Number of Reported Cases of Dengue and Severe Dengue (DS) in the Americas, by Country 2012. Pan American Health Organization (PAHO).

Pan American Health Organization (PAHO). Number of Reported Cases of Dengue and Severe Dengue (DS) in the Americas, by Country 2013. Pan American Health Organization (PAHO).

World Health Organization (WHO). WHO DengueNet. Geneva, Switzerland: World Health Organization (WHO).

## China

Chinese Center for Disease Control and Prevention (CCDC). China Notifiable Infectious Diseases 2004-2012.

Pan American Health Organization (PAHO). Number of Reported Cases of Dengue and Severe Dengue (DS) in the Americas, by Country 2011. Pan American Health Organization (PAHO).

Pan American Health Organization (PAHO). Number of Reported Cases of Dengue and Severe Dengue (DS) in the Americas, by Country 2012. Pan American Health Organization (PAHO).

Pan American Health Organization (PAHO). Number of Reported Cases of Dengue and Severe Dengue (DS) in the Americas, by Country 2013. Pan American Health Organization (PAHO).

World Health Organization (WHO). WHO DengueNet. Geneva, Switzerland: World Health Organization (WHO).

World Health Organization Regional Office for the Western Pacific. Number of Reported Cases of Dengue Fever and Dengue Hemorrhagic Fever in the Western Pacific Region, by Country 2000.

World Health Organization Regional Office for the Western Pacific. Number of Reported Cases of Dengue Fever and Dengue Hemorrhagic Fever in the Western Pacific Region, by Country 2001.

World Health Organization Regional Office for the Western Pacific. Number of Reported Cases of Dengue Fever and Dengue Hemorrhagic Fever in the Western Pacific Region, by Country 2002.

World Health Organization Regional Office for the Western Pacific. Number of Reported Cases of Dengue Fever and Dengue Hemorrhagic Fever in the Western Pacific Region, by Country 2003.

World Health Organization Regional Office for the Western Pacific. Number of Reported Cases of Dengue Fever and Dengue Hemorrhagic Fever in the Western Pacific Region, by Country 2004.



World Health Organization Regional Office for the Western Pacific. Number of Reported Cases of Dengue Fever and Dengue Hemorrhagic Fever in the Western Pacific Region, by Country 2005.

World Health Organization Regional Office for the Western Pacific. Number of Reported Cases of Dengue Fever and Dengue Hemorrhagic Fever in the Western Pacific Region, by Country 2006.

World Health Organization Regional Office for the Western Pacific. Number of Reported Cases of Dengue Fever and Dengue Hemorrhagic Fever in the Western Pacific Region, by Country 2007.

World Health Organization Regional Office for the Western Pacific. Number of Reported Cases of Dengue Fever and Dengue Hemorrhagic Fever in the Western Pacific Region, by Country 2008.

World Health Organization Regional Office for the Western Pacific. Number of Reported Cases of Dengue Fever and Dengue Hemorrhagic Fever in the Western Pacific Region, by Country 2009.

World Health Organization Regional Office for the Western Pacific. Number of Reported Cases of Dengue Fever and Dengue Hemorrhagic Fever in the Western Pacific Region, by Country 2010.

## Colombia

Pan American Health Organization (PAHO). Number of Reported Cases of Dengue and Dengue Hemorrhagic Fever (DHF) in the Americas, by Country 2003. Pan American Health Organization (PAHO).

Pan American Health Organization (PAHO). Number of Reported Cases of Dengue and Dengue Hemorrhagic Fever (DHF) in the Americas, by Country 2004. Pan American Health Organization (PAHO).

Pan American Health Organization (PAHO). Number of Reported Cases of Dengue and Dengue Hemorrhagic Fever (DHF) in the Americas, by Country 2005. Pan American Health Organization (PAHO).

Pan American Health Organization (PAHO). Number of Reported Cases of Dengue and Dengue Hemorrhagic Fever (DHF) in the Americas, by Country 2006. Pan American Health Organization (PAHO).

Pan American Health Organization (PAHO). Number of Reported Cases of Dengue and Dengue Hemorrhagic Fever (DHF) in the Americas, by Country 2007. Pan American Health Organization (PAHO).

Pan American Health Organization (PAHO). Number of Reported Cases of Dengue and Severe Dengue (DS) in the Americas, by Country 2008. Pan American Health Organization (PAHO).

Pan American Health Organization (PAHO). Number of Reported Cases of Dengue and Severe Dengue (DS) in the Americas, by Country 2009. Pan American Health Organization (PAHO).

Pan American Health Organization (PAHO). Number of Reported Cases of Dengue and Severe Dengue (DS) in the Americas, by Country 2010. Pan American Health Organization (PAHO).

Pan American Health Organization (PAHO). Number of Reported Cases of Dengue and Severe Dengue (DS) in the Americas, by Country 2011. Pan American Health Organization (PAHO).

Pan American Health Organization (PAHO). Number of Reported Cases of Dengue and Severe Dengue (DS) in the Americas, by Country 2012. Pan American Health Organization (PAHO).

Pan American Health Organization (PAHO). Number of Reported Cases of Dengue and Severe Dengue (DS) in the Americas, by Country 2013. Pan American Health Organization (PAHO).

World Health Organization (WHO). WHO DengueNet. Geneva, Switzerland: World Health Organization (WHO).

## Comoros

Boisier P, Morvan JM, Laventure S, Charrier N, Martin E, Ouledi A, Roux J. [Dengue 1 epidemic in the Grand Comoro Island (Federal Islamic Republic of the Comores). March-May 1993]. Ann Soc Belg Med Trop. 1994; 74(3): 217-29.

## Costa Rica

Ministry of Health (Costa Rica). Costa Rica Ministry of Health Dengue Surveillance 2007-2008.

Pan American Health Organization (PAHO). Number of Reported Cases of Dengue and Dengue Hemorrhagic Fever (DHF) in the Americas, by Country 2003. Pan American Health Organization (PAHO).

Pan American Health Organization (PAHO). Number of Reported Cases of Dengue and Dengue Hemorrhagic Fever (DHF) in the Americas, by Country 2004. Pan American Health Organization (PAHO).

Pan American Health Organization (PAHO). Number of Reported Cases of Dengue and Dengue Hemorrhagic Fever (DHF) in the Americas, by Country 2005. Pan American Health Organization (PAHO).

Pan American Health Organization (PAHO). Number of Reported Cases of Dengue and Dengue Hemorrhagic Fever (DHF) in the Americas, by Country 2006. Pan American Health Organization (PAHO).

Pan American Health Organization (PAHO). Number of Reported Cases of Dengue and Severe Dengue (DS) in the Americas, by Country 2008. Pan American Health Organization (PAHO).

Pan American Health Organization (PAHO). Number of Reported Cases of Dengue and Severe Dengue (DS) in the Americas, by Country 2009. Pan American Health Organization (PAHO).

Pan American Health Organization (PAHO). Number of Reported Cases of Dengue and Severe Dengue (DS) in the Americas, by Country 2010. Pan American Health Organization (PAHO).

Pan American Health Organization (PAHO). Number of Reported Cases of Dengue and Severe Dengue (DS) in the Americas, by Country 2011. Pan American Health Organization (PAHO).

Pan American Health Organization (PAHO). Number of Reported Cases of Dengue and Severe Dengue (DS) in the Americas, by Country 2012. Pan American Health Organization (PAHO).

Pan American Health Organization (PAHO). Number of Reported Cases of Dengue and Severe Dengue (DS) in the Americas, by Country 2013. Pan American Health Organization (PAHO).

World Health Organization (WHO). WHO DengueNet. Geneva, Switzerland: World Health Organization (WHO).

## Cuba

Pan American Health Organization (PAHO). Number of Reported Cases of Dengue and Severe Dengue (DS) in the Americas, by Country 2008. Pan American Health Organization (PAHO).

Pan American Health Organization (PAHO). Number of Reported Cases of Dengue and Severe Dengue (DS) in the Americas, by Country 2009. Pan American Health Organization (PAHO).

Pan American Health Organization (PAHO). Number of Reported Cases of Dengue and Severe Dengue (DS) in the Americas, by Country 2010. Pan American Health Organization (PAHO).

Pan American Health Organization (PAHO). Number of Reported Cases of Dengue and Severe Dengue (DS) in the Americas, by Country 2011. Pan American Health Organization (PAHO).

Pan American Health Organization (PAHO). Number of Reported Cases of Dengue and Severe Dengue (DS) in the Americas, by Country 2012. Pan American Health Organization (PAHO).

Pan American Health Organization (PAHO). Number of Reported Cases of Dengue and Severe Dengue (DS) in the Americas, by Country 2013. Pan American Health Organization (PAHO).

Peláez O, Guzmán MG, Kourí G, Pérez R, San Martín JL, Vázquez S, Rosario D, Mora R, Quintana I, Bisset J, Cancio R, Masa AM, Castro O, González D, Avila LC, Rodríguez R, Alvarez M, Pelegrino JL, Bernardo L, Prado I. Dengue 3 epidemic, Havana, 2001. *Emerg Infect Dis.* 2004; 10(4): 719-22.

World Health Organization (WHO). WHO DengueNet. Geneva, Switzerland: World Health Organization (WHO).

## Dominica

Pan American Health Organization (PAHO). Number of Reported Cases of Dengue and Severe Dengue (DS) in the Americas, by Country 2008. Pan American Health Organization (PAHO).

Pan American Health Organization (PAHO). Number of Reported Cases of Dengue and Severe Dengue (DS) in the Americas, by Country 2009. Pan American Health Organization (PAHO).

Pan American Health Organization (PAHO). Number of Reported Cases of Dengue and Severe Dengue (DS) in the Americas, by Country 2010. Pan American Health Organization (PAHO).

Pan American Health Organization (PAHO). Number of Reported Cases of Dengue and Severe Dengue (DS) in the Americas, by Country 2011. Pan American Health Organization (PAHO).

Pan American Health Organization (PAHO). Number of Reported Cases of Dengue and Severe Dengue (DS) in the Americas, by Country 2012. Pan American Health Organization (PAHO).

Pan American Health Organization (PAHO). Number of Reported Cases of Dengue and Severe Dengue (DS) in the Americas, by Country 2013. Pan American Health Organization (PAHO).

World Health Organization (WHO). WHO DengueNet. Geneva, Switzerland: World Health Organization (WHO).

## Dominican Republic

Pan American Health Organization (PAHO). Number of Reported Cases of Dengue and Dengue Hemorrhagic Fever (DHF) in the Americas, by Country 2003. Pan American Health Organization (PAHO).

Pan American Health Organization (PAHO). Number of Reported Cases of Dengue and Dengue Hemorrhagic Fever (DHF) in the Americas, by Country 2004. Pan American Health Organization (PAHO).

Pan American Health Organization (PAHO). Number of Reported Cases of Dengue and Dengue Hemorrhagic Fever (DHF) in the Americas, by Country 2005. Pan American Health Organization (PAHO).

Pan American Health Organization (PAHO). Number of Reported Cases of Dengue and Dengue Hemorrhagic Fever (DHF) in the Americas, by Country 2006. Pan American Health Organization (PAHO).

Pan American Health Organization (PAHO). Number of Reported Cases of Dengue and Dengue Hemorrhagic Fever (DHF) in the Americas, by Country 2007. Pan American Health Organization (PAHO).

Pan American Health Organization (PAHO). Number of Reported Cases of Dengue and Severe Dengue (DS) in the Americas, by Country 2008. Pan American Health Organization (PAHO).

Pan American Health Organization (PAHO). Number of Reported Cases of Dengue and Severe Dengue (DS) in the Americas, by Country 2009. Pan American Health Organization (PAHO).

Pan American Health Organization (PAHO). Number of Reported Cases of Dengue and Severe Dengue (DS) in the Americas, by Country 2010. Pan American Health Organization (PAHO).

Pan American Health Organization (PAHO). Number of Reported Cases of Dengue and Severe Dengue (DS) in the Americas, by Country 2011. Pan American Health Organization (PAHO).

Pan American Health Organization (PAHO). Number of Reported Cases of Dengue and Severe Dengue (DS) in the Americas, by Country 2012. Pan American Health Organization (PAHO).

Pan American Health Organization (PAHO). Number of Reported Cases of Dengue and Severe Dengue (DS) in the Americas, by Country 2013. Pan American Health Organization (PAHO).

World Health Organization (WHO). WHO DengueNet. Geneva, Switzerland: World Health Organization (WHO).

## Ecuador

Pan American Health Organization (PAHO). Number of Reported Cases of Dengue and Dengue Hemorrhagic Fever (DHF) in the Americas, by Country 2003. Pan American Health Organization (PAHO).

Pan American Health Organization (PAHO). Number of Reported Cases of Dengue and Dengue Hemorrhagic Fever (DHF) in the Americas, by Country 2004. Pan American Health Organization (PAHO).

Pan American Health Organization (PAHO). Number of Reported Cases of Dengue and Dengue Hemorrhagic Fever (DHF) in the Americas, by Country 2005. Pan American Health Organization (PAHO).

Pan American Health Organization (PAHO). Number of Reported Cases of Dengue and Dengue Hemorrhagic Fever (DHF) in the Americas, by Country 2006. Pan American Health Organization (PAHO).

Pan American Health Organization (PAHO). Number of Reported Cases of Dengue and Dengue Hemorrhagic Fever (DHF) in the Americas, by Country 2007. Pan American Health Organization (PAHO).

Pan American Health Organization (PAHO). Number of Reported Cases of Dengue and Severe Dengue (DS) in the Americas, by Country 2008. Pan American Health Organization (PAHO).

Pan American Health Organization (PAHO). Number of Reported Cases of Dengue and Severe Dengue (DS) in the Americas, by Country 2009. Pan American Health Organization (PAHO).

Pan American Health Organization (PAHO). Number of Reported Cases of Dengue and Severe Dengue (DS) in the Americas, by Country 2010. Pan American Health Organization (PAHO).

Pan American Health Organization (PAHO). Number of Reported Cases of Dengue and Severe Dengue (DS) in the Americas, by Country 2011. Pan American Health Organization (PAHO).

Pan American Health Organization (PAHO). Number of Reported Cases of Dengue and Severe Dengue (DS) in the Americas, by Country 2012. Pan American Health Organization (PAHO).

Pan American Health Organization (PAHO). Number of Reported Cases of Dengue and Severe Dengue (DS) in the Americas, by Country 2013. Pan American Health Organization (PAHO).

World Health Organization (WHO). WHO DengueNet. Geneva, Switzerland: World Health Organization (WHO).

## El Salvador

Ministry of Health (El Salvador). El Salvador Ministry of Health Dengue Statistics 2001-2009. San Salvador, El Salvador: Ministry of Health (El Salvador).

Pan American Health Organization (PAHO). Number of Reported Cases of Dengue and Severe Dengue (DS) in the Americas, by Country 2008. Pan American Health Organization (PAHO).

Pan American Health Organization (PAHO). Number of Reported Cases of Dengue and Severe Dengue (DS) in the Americas, by Country 2009. Pan American Health Organization (PAHO).

Pan American Health Organization (PAHO). Number of Reported Cases of Dengue and Severe Dengue (DS) in the Americas, by Country 2010. Pan American Health Organization (PAHO).

Pan American Health Organization (PAHO). Number of Reported Cases of Dengue and Severe Dengue (DS) in the Americas, by Country 2011. Pan American Health Organization (PAHO).

Pan American Health Organization (PAHO). Number of Reported Cases of Dengue and Severe Dengue (DS) in the Americas, by Country 2012. Pan American Health Organization (PAHO).

Pan American Health Organization (PAHO). Number of Reported Cases of Dengue and Severe Dengue (DS) in the Americas, by Country 2013. Pan American Health Organization (PAHO).

World Health Organization (WHO). WHO DengueNet. Geneva, Switzerland: World Health Organization (WHO).

#### Federated States of Micronesia

World Health Organization (WHO). WHO DengueNet. Geneva, Switzerland: World Health Organization (WHO).

World Health Organization Regional Office for the Western Pacific. Number of Reported Cases of Dengue Fever and Dengue Hemorrhagic Fever in the Western Pacific Region, by Country 2000.

World Health Organization Regional Office for the Western Pacific. Number of Reported Cases of Dengue Fever and Dengue Hemorrhagic Fever in the Western Pacific Region, by Country 2001.

World Health Organization Regional Office for the Western Pacific. Number of Reported Cases of Dengue Fever and Dengue Hemorrhagic Fever in the Western Pacific Region, by Country 2002.

World Health Organization Regional Office for the Western Pacific. Number of Reported Cases of Dengue Fever and Dengue Hemorrhagic Fever in the Western Pacific Region, by Country 2003.

World Health Organization Regional Office for the Western Pacific. Number of Reported Cases of Dengue Fever and Dengue Hemorrhagic Fever in the Western Pacific Region, by Country 2004.

World Health Organization Regional Office for the Western Pacific. Number of Reported Cases of Dengue Fever and Dengue Hemorrhagic Fever in the Western Pacific Region, by Country 2007.

World Health Organization Regional Office for the Western Pacific. Number of Reported Cases of Dengue Fever and Dengue Hemorrhagic Fever in the Western Pacific Region, by Country 2008.

World Health Organization Regional Office for the Western Pacific. Number of Reported Cases of Dengue Fever and Dengue Hemorrhagic Fever in the Western Pacific Region, by Country 2009.

World Health Organization Regional Office for the Western Pacific. Number of Reported Cases of Dengue Fever and Dengue Hemorrhagic Fever in the Western Pacific Region, by Country 2010.

#### Fiji

World Health Organization (WHO). WHO DengueNet. Geneva, Switzerland: World Health Organization (WHO).

World Health Organization Regional Office for the Western Pacific. Number of Reported Cases of Dengue Fever and Dengue Hemorrhagic Fever in the Western Pacific Region, by Country 2000.

World Health Organization Regional Office for the Western Pacific. Number of Reported Cases of Dengue Fever and Dengue Hemorrhagic Fever in the Western Pacific Region, by Country 2001.

World Health Organization Regional Office for the Western Pacific. Number of Reported Cases of Dengue Fever and Dengue Hemorrhagic Fever in the Western Pacific Region, by Country 2002.

World Health Organization Regional Office for the Western Pacific. Number of Reported Cases of Dengue Fever and Dengue Hemorrhagic Fever in the Western Pacific Region, by Country 2003.

World Health Organization Regional Office for the Western Pacific. Number of Reported Cases of Dengue Fever and Dengue Hemorrhagic Fever in the Western Pacific Region, by Country 2004.

World Health Organization Regional Office for the Western Pacific. Number of Reported Cases of Dengue Fever and Dengue Hemorrhagic Fever in the Western Pacific Region, by Country 2005.

World Health Organization Regional Office for the Western Pacific. Number of Reported Cases of Dengue Fever and Dengue Hemorrhagic Fever in the Western Pacific Region, by Country 2006.

World Health Organization Regional Office for the Western Pacific. Number of Reported Cases of Dengue Fever and Dengue Hemorrhagic Fever in the Western Pacific Region, by Country 2007.

World Health Organization Regional Office for the Western Pacific. Number of Reported Cases of Dengue Fever and Dengue Hemorrhagic Fever in the Western Pacific Region, by Country 2008.

World Health Organization Regional Office for the Western Pacific. Number of Reported Cases of Dengue Fever and Dengue Hemorrhagic Fever in the Western Pacific Region, by Country 2009.

World Health Organization Regional Office for the Western Pacific. Number of Reported Cases of Dengue Fever and Dengue Hemorrhagic Fever in the Western Pacific Region, by Country 2010.

## Grenada

Pan American Health Organization (PAHO). Number of Reported Cases of Dengue and Severe Dengue (DS) in the Americas, by Country 2008. Pan American Health Organization (PAHO).

Pan American Health Organization (PAHO). Number of Reported Cases of Dengue and Severe Dengue (DS) in the Americas, by Country 2009. Pan American Health Organization (PAHO).

Pan American Health Organization (PAHO). Number of Reported Cases of Dengue and Severe Dengue (DS) in the Americas, by Country 2010. Pan American Health Organization (PAHO).

Pan American Health Organization (PAHO). Number of Reported Cases of Dengue and Severe Dengue (DS) in the Americas, by Country 2011. Pan American Health Organization (PAHO).

Pan American Health Organization (PAHO). Number of Reported Cases of Dengue and Severe Dengue (DS) in the Americas, by Country 2012. Pan American Health Organization (PAHO).

Pan American Health Organization (PAHO). Number of Reported Cases of Dengue and Severe Dengue (DS) in the Americas, by Country 2013. Pan American Health Organization (PAHO).

World Health Organization (WHO). WHO DengueNet. Geneva, Switzerland: World Health Organization (WHO).

## Guatemala

Pan American Health Organization (PAHO). Number of Reported Cases of Dengue and Dengue Hemorrhagic Fever (DHF) in the Americas, by Country 2003. Pan American Health Organization (PAHO).

Pan American Health Organization (PAHO). Number of Reported Cases of Dengue and Dengue Hemorrhagic Fever (DHF) in the Americas, by Country 2004. Pan American Health Organization (PAHO).

Pan American Health Organization (PAHO). Number of Reported Cases of Dengue and Dengue Hemorrhagic Fever (DHF) in the Americas, by Country 2005. Pan American Health Organization (PAHO).

Pan American Health Organization (PAHO). Number of Reported Cases of Dengue and Dengue Hemorrhagic Fever (DHF) in the Americas, by Country 2006. Pan American Health Organization (PAHO).

Pan American Health Organization (PAHO). Number of Reported Cases of Dengue and Dengue Hemorrhagic Fever (DHF) in the Americas, by Country 2007. Pan American Health Organization (PAHO).

Pan American Health Organization (PAHO). Number of Reported Cases of Dengue and Severe Dengue (DS) in the Americas, by Country 2008. Pan American Health Organization (PAHO).

Pan American Health Organization (PAHO). Number of Reported Cases of Dengue and Severe Dengue (DS) in the Americas, by Country 2009. Pan American Health Organization (PAHO).

Pan American Health Organization (PAHO). Number of Reported Cases of Dengue and Severe Dengue (DS) in the Americas, by Country 2010. Pan American Health Organization (PAHO).

Pan American Health Organization (PAHO). Number of Reported Cases of Dengue and Severe Dengue (DS) in the Americas, by Country 2011. Pan American Health Organization (PAHO).

Pan American Health Organization (PAHO). Number of Reported Cases of Dengue and Severe Dengue (DS) in the Americas, by Country 2012. Pan American Health Organization (PAHO).

Pan American Health Organization (PAHO). Number of Reported Cases of Dengue and Severe Dengue (DS) in the Americas, by Country 2013. Pan American Health Organization (PAHO).

World Health Organization (WHO). WHO DengueNet. Geneva, Switzerland: World Health Organization (WHO).

## Guinea

Jentes ES, Robinson J, Johnson BW, Conde I, Sakouvougui Y, Iverson J, Beecher S, Bah MA, Diakite F, Coulibaly M, Bausch DG, Bryan J. Acute arboviral infections in Guinea, West Africa, 2006. *Am J Trop Med Hyg.* 2010; 83(2): 388-94.

## Guyana

Pan American Health Organization (PAHO). Number of Reported Cases of Dengue and Severe Dengue (DS) in the Americas, by Country 2008. Pan American Health Organization (PAHO).



Pan American Health Organization (PAHO). Number of Reported Cases of Dengue and Severe Dengue (DS) in the Americas, by Country 2009. Pan American Health Organization (PAHO).

Pan American Health Organization (PAHO). Number of Reported Cases of Dengue and Severe Dengue (DS) in the Americas, by Country 2010. Pan American Health Organization (PAHO).

Pan American Health Organization (PAHO). Number of Reported Cases of Dengue and Severe Dengue (DS) in the Americas, by Country 2011. Pan American Health Organization (PAHO).

Pan American Health Organization (PAHO). Number of Reported Cases of Dengue and Severe Dengue (DS) in the Americas, by Country 2012. Pan American Health Organization (PAHO).

Pan American Health Organization (PAHO). Number of Reported Cases of Dengue and Severe Dengue (DS) in the Americas, by Country 2013. Pan American Health Organization (PAHO).

World Health Organization (WHO). WHO DengueNet. Geneva, Switzerland: World Health Organization (WHO).

## Haiti

Pan American Health Organization (PAHO). Number of Reported Cases of Dengue and Severe Dengue (DS) in the Americas, by Country 2009. Pan American Health Organization (PAHO).

Pan American Health Organization (PAHO). Number of Reported Cases of Dengue and Severe Dengue (DS) in the Americas, by Country 2010. Pan American Health Organization (PAHO).

Pan American Health Organization (PAHO). Number of Reported Cases of Dengue and Severe Dengue (DS) in the Americas, by Country 2011. Pan American Health Organization (PAHO).

Pan American Health Organization (PAHO). Number of Reported Cases of Dengue and Severe Dengue (DS) in the Americas, by Country 2012. Pan American Health Organization (PAHO).

Pan American Health Organization (PAHO). Number of Reported Cases of Dengue and Severe Dengue (DS) in the Americas, by Country 2013. Pan American Health Organization (PAHO).

World Health Organization (WHO). WHO DengueNet. Geneva, Switzerland: World Health Organization (WHO).

## Honduras

Pan American Health Organization (PAHO). Number of Reported Cases of Dengue and Dengue Hemorrhagic Fever (DHF) in the Americas, by Country 2003. Pan American Health Organization (PAHO).

Pan American Health Organization (PAHO). Number of Reported Cases of Dengue and Dengue Hemorrhagic Fever (DHF) in the Americas, by Country 2004. Pan American Health Organization (PAHO).

Pan American Health Organization (PAHO). Number of Reported Cases of Dengue and Dengue Hemorrhagic Fever (DHF) in the Americas, by Country 2005. Pan American Health Organization (PAHO).

Pan American Health Organization (PAHO). Number of Reported Cases of Dengue and Dengue Hemorrhagic Fever (DHF) in the Americas, by Country 2006. Pan American Health Organization (PAHO).

Pan American Health Organization (PAHO). Number of Reported Cases of Dengue and Dengue Hemorrhagic Fever (DHF) in the Americas, by Country 2007. Pan American Health Organization (PAHO).

Pan American Health Organization (PAHO). Number of Reported Cases of Dengue and Severe Dengue (DS) in the Americas, by Country 2008. Pan American Health Organization (PAHO).

Pan American Health Organization (PAHO). Number of Reported Cases of Dengue and Severe Dengue (DS) in the Americas, by Country 2009. Pan American Health Organization (PAHO).

Pan American Health Organization (PAHO). Number of Reported Cases of Dengue and Severe Dengue (DS) in the Americas, by Country 2010. Pan American Health Organization (PAHO).

Pan American Health Organization (PAHO). Number of Reported Cases of Dengue and Severe Dengue (DS) in the Americas, by Country 2011. Pan American Health Organization (PAHO).

Pan American Health Organization (PAHO). Number of Reported Cases of Dengue and Severe Dengue (DS) in the Americas, by Country 2012. Pan American Health Organization (PAHO).

Pan American Health Organization (PAHO). Number of Reported Cases of Dengue and Severe Dengue (DS) in the Americas, by Country 2013. Pan American Health Organization (PAHO).

World Health Organization (WHO). WHO DengueNet. Geneva, Switzerland: World Health Organization (WHO).

## India

Gubler DJ, Meltzer M. Impact of dengue/dengue hemorrhagic fever on the developing world. *Adv Virus Res.* 1999; 53: 35-70.

National Vector Borne Disease Control Programme, Ministry of Health and Family Welfare (India). *India Dengue Cases and Deaths.* Delhi, India: National Vector Borne Disease Control Programme, Ministry of Health and Family Welfare (India).

WHO Department of Communicable Disease Surveillance and Response. *WHO Report on Global Surveillance of Epidemic-prone Infectious Diseases 2000.*

WHO Regional Office for South-East Asia (SEARO). *WHO South-East Asia Region: Reported Cases and Deaths of Dengue from 2003 to 2012.* New Delhi, India: WHO Regional Office for South-East Asia (SEARO), 2013.

World Health Organization (WHO). WHO DengueNet. Geneva, Switzerland: World Health Organization (WHO).

World Health Organization Regional Office for South-East Asia (SEARO). *Reported Cases of DF/DHF in Selected Countries in SEA Region.* New Delhi, India: World Health Organization Regional Office for South-East Asia (SEARO).

World Health Organization Regional Office for South-East Asia (SEARO). Situation Update of Dengue in the SEA Region, 2010. New Delhi, India: World Health Organization Regional Office for South-East Asia (SEARO).

## Indonesia

WHO Regional Office for South-East Asia (SEARO). WHO South-East Asia Region: Reported Cases and Deaths of Dengue from 2003 to 2012. New Delhi, India: WHO Regional Office for South-East Asia (SEARO), 2013.

World Health Organization Regional Office for South-East Asia (SEARO). Reported Cases of DF/DHF in Selected Countries in SEA Region. New Delhi, India: World Health Organization Regional Office for South-East Asia (SEARO).

World Health Organization Regional Office for South-East Asia (SEARO). Situation Update of Dengue in the SEA Region, 2010. New Delhi, India: World Health Organization Regional Office for South-East Asia (SEARO).

## Jamaica

Pan American Health Organization (PAHO). Number of Reported Cases of Dengue and Severe Dengue (DS) in the Americas, by Country 2008. Pan American Health Organization (PAHO).

Pan American Health Organization (PAHO). Number of Reported Cases of Dengue and Severe Dengue (DS) in the Americas, by Country 2009. Pan American Health Organization (PAHO).

Pan American Health Organization (PAHO). Number of Reported Cases of Dengue and Severe Dengue (DS) in the Americas, by Country 2010. Pan American Health Organization (PAHO).

Pan American Health Organization (PAHO). Number of Reported Cases of Dengue and Severe Dengue (DS) in the Americas, by Country 2011. Pan American Health Organization (PAHO).

Pan American Health Organization (PAHO). Number of Reported Cases of Dengue and Severe Dengue (DS) in the Americas, by Country 2012. Pan American Health Organization (PAHO).

Pan American Health Organization (PAHO). Number of Reported Cases of Dengue and Severe Dengue (DS) in the Americas, by Country 2013. Pan American Health Organization (PAHO).

World Health Organization (WHO). WHO DengueNet. Geneva, Switzerland: World Health Organization (WHO).

## Japan

Okuno Y, Harada T, Ogawa M, Okamoto Y, Maeda K. A case of dengue hemorrhagic fever in a Japanese child. *Microbiol Immunol.* 1989; 33(8): 649-55.

World Health Organization (WHO). WHO DengueNet. Geneva, Switzerland: World Health Organization (WHO).

World Health Organization Regional Office for the Western Pacific. Number of Reported Cases of Dengue Fever and Dengue Hemorrhagic Fever in the Western Pacific Region, by Country 2000.

World Health Organization Regional Office for the Western Pacific. Number of Reported Cases of Dengue Fever and Dengue Hemorrhagic Fever in the Western Pacific Region, by Country 2001.

World Health Organization Regional Office for the Western Pacific. Number of Reported Cases of Dengue Fever and Dengue Hemorrhagic Fever in the Western Pacific Region, by Country 2002.

World Health Organization Regional Office for the Western Pacific. Number of Reported Cases of Dengue Fever and Dengue Hemorrhagic Fever in the Western Pacific Region, by Country 2003.

World Health Organization Regional Office for the Western Pacific. Number of Reported Cases of Dengue Fever and Dengue Hemorrhagic Fever in the Western Pacific Region, by Country 2004.

World Health Organization Regional Office for the Western Pacific. Number of Reported Cases of Dengue Fever and Dengue Hemorrhagic Fever in the Western Pacific Region, by Country 2005.

World Health Organization Regional Office for the Western Pacific. Number of Reported Cases of Dengue Fever and Dengue Hemorrhagic Fever in the Western Pacific Region, by Country 2006.

World Health Organization Regional Office for the Western Pacific. Number of Reported Cases of Dengue Fever and Dengue Hemorrhagic Fever in the Western Pacific Region, by Country 2007.

World Health Organization Regional Office for the Western Pacific. Number of Reported Cases of Dengue Fever and Dengue Hemorrhagic Fever in the Western Pacific Region, by Country 2008.

World Health Organization Regional Office for the Western Pacific. Number of Reported Cases of Dengue Fever and Dengue Hemorrhagic Fever in the Western Pacific Region, by Country 2009.

World Health Organization Regional Office for the Western Pacific. Number of Reported Cases of Dengue Fever and Dengue Hemorrhagic Fever in the Western Pacific Region, by Country 2010.

Yamada K, Takasaki T, Nawa M, Nakayama M, Arai YT, Morimoto K, Yabe S, Kurane I. Demographic Features of Imported Dengue Fever Cases Serodiagnosed in Japan during 2000. *Dengue Bull.* 2000; 24: 42–5.

## Kiribati

World Health Organization (WHO). WHO DengueNet. Geneva, Switzerland: World Health Organization (WHO).

World Health Organization Regional Office for the Western Pacific. Number of Reported Cases of Dengue Fever and Dengue Hemorrhagic Fever in the Western Pacific Region, by Country 2000.

World Health Organization Regional Office for the Western Pacific. Number of Reported Cases of Dengue Fever and Dengue Hemorrhagic Fever in the Western Pacific Region, by Country 2001.

World Health Organization Regional Office for the Western Pacific. Number of Reported Cases of Dengue Fever and Dengue Hemorrhagic Fever in the Western Pacific Region, by Country 2002.

World Health Organization Regional Office for the Western Pacific. Number of Reported Cases of Dengue Fever and Dengue Hemorrhagic Fever in the Western Pacific Region, by Country 2003.



## Malaysia

Ministry of Health (Malaysia). Incidence of Dengue Cases (Clinical) In Malaysia 1973-2005. Ministry of Health [Internet]. Putrajaya, Malaysia: Ministry of Health (Malaysia).

World Health Organization (WHO). WHO DengueNet. Geneva, Switzerland: World Health Organization (WHO).

World Health Organization Regional Office for the Western Pacific. Number of Reported Cases of Dengue Fever and Dengue Hemorrhagic Fever in the Western Pacific Region, by Country 2000.

World Health Organization Regional Office for the Western Pacific. Number of Reported Cases of Dengue Fever and Dengue Hemorrhagic Fever in the Western Pacific Region, by Country 2001.

World Health Organization Regional Office for the Western Pacific. Number of Reported Cases of Dengue Fever and Dengue Hemorrhagic Fever in the Western Pacific Region, by Country 2002.

World Health Organization Regional Office for the Western Pacific. Number of Reported Cases of Dengue Fever and Dengue Hemorrhagic Fever in the Western Pacific Region, by Country 2003.

World Health Organization Regional Office for the Western Pacific. Number of Reported Cases of Dengue Fever and Dengue Hemorrhagic Fever in the Western Pacific Region, by Country 2004.

World Health Organization Regional Office for the Western Pacific. Number of Reported Cases of Dengue Fever and Dengue Hemorrhagic Fever in the Western Pacific Region, by Country 2005.

World Health Organization Regional Office for the Western Pacific. Number of Reported Cases of Dengue Fever and Dengue Hemorrhagic Fever in the Western Pacific Region, by Country 2006.

World Health Organization Regional Office for the Western Pacific. Number of Reported Cases of Dengue Fever and Dengue Hemorrhagic Fever in the Western Pacific Region, by Country 2007.

World Health Organization Regional Office for the Western Pacific. Number of Reported Cases of Dengue Fever and Dengue Hemorrhagic Fever in the Western Pacific Region, by Country 2008.

World Health Organization Regional Office for the Western Pacific. Number of Reported Cases of Dengue Fever and Dengue Hemorrhagic Fever in the Western Pacific Region, by Country 2009.

World Health Organization Regional Office for the Western Pacific. Number of Reported Cases of Dengue Fever and Dengue Hemorrhagic Fever in the Western Pacific Region, by Country 2010.

## Maldives

Shaheem I, Afeef A. Dengue and Dengue Haemorrhagic Fever and its Control in Maldives. Dengue Bull. 1999; 23; 30-3.

WHO Regional Office for South-East Asia (SEARO). WHO South-East Asia Region: Reported Cases and Deaths of Dengue from 2003 to 2012. New Delhi, India: WHO Regional Office for South-East Asia (SEARO), 2013.

World Health Organization (WHO). WHO DengueNet. Geneva, Switzerland: World Health Organization (WHO).

World Health Organization Regional Office for South-East Asia (SEARO). Situation Update of Dengue in the SEA Region, 2010. New Delhi, India: World Health Organization Regional Office for South-East Asia (SEARO).

#### Marshall Islands

World Health Organization (WHO). WHO DengueNet. Geneva, Switzerland: World Health Organization (WHO).

World Health Organization Regional Office for the Western Pacific. Number of Reported Cases of Dengue Fever and Dengue Hemorrhagic Fever in the Western Pacific Region, by Country 2000.

World Health Organization Regional Office for the Western Pacific. Number of Reported Cases of Dengue Fever and Dengue Hemorrhagic Fever in the Western Pacific Region, by Country 2001.

World Health Organization Regional Office for the Western Pacific. Number of Reported Cases of Dengue Fever and Dengue Hemorrhagic Fever in the Western Pacific Region, by Country 2002.

World Health Organization Regional Office for the Western Pacific. Number of Reported Cases of Dengue Fever and Dengue Hemorrhagic Fever in the Western Pacific Region, by Country 2003.

World Health Organization Regional Office for the Western Pacific. Number of Reported Cases of Dengue Fever and Dengue Hemorrhagic Fever in the Western Pacific Region, by Country 2004.

World Health Organization Regional Office for the Western Pacific. Number of Reported Cases of Dengue Fever and Dengue Hemorrhagic Fever in the Western Pacific Region, by Country 2005.

World Health Organization Regional Office for the Western Pacific. Number of Reported Cases of Dengue Fever and Dengue Hemorrhagic Fever in the Western Pacific Region, by Country 2006.

World Health Organization Regional Office for the Western Pacific. Number of Reported Cases of Dengue Fever and Dengue Hemorrhagic Fever in the Western Pacific Region, by Country 2009.

#### Mexico

Chowell G, Diaz-Duenas P, Chowell D, Hews S, Ceja-Espiritu G, M. Hyman J, Castillo-Chavez C. Clinical Diagnosis Delays and Epidemiology of Dengue Fever during the 2002 Outbreak in Colima, Mexico. *Dengue Bull.* 2007; 31: 26-35.

Directorate General of Epidemiology, Ministry of Health (Mexico). Mexico Morbidity Yearbooks 1984-2008.

Pan American Health Organization (PAHO). Number of Reported Cases of Dengue and Dengue Hemorrhagic Fever (DHF) in the Americas, by Country 2007. Pan American Health Organization (PAHO).

Pan American Health Organization (PAHO). Number of Reported Cases of Dengue and Severe Dengue (DS) in the Americas, by Country 2008. Pan American Health Organization (PAHO).

Pan American Health Organization (PAHO). Number of Reported Cases of Dengue and Severe Dengue (DS) in the Americas, by Country 2009. Pan American Health Organization (PAHO).

Pan American Health Organization (PAHO). Number of Reported Cases of Dengue and Severe Dengue (DS) in the Americas, by Country 2010. Pan American Health Organization (PAHO).

Pan American Health Organization (PAHO). Number of Reported Cases of Dengue and Severe Dengue (DS) in the Americas, by Country 2011. Pan American Health Organization (PAHO).

Pan American Health Organization (PAHO). Number of Reported Cases of Dengue and Severe Dengue (DS) in the Americas, by Country 2012. Pan American Health Organization (PAHO).

Pan American Health Organization (PAHO). Number of Reported Cases of Dengue and Severe Dengue (DS) in the Americas, by Country 2013. Pan American Health Organization (PAHO).

World Health Organization (WHO). WHO DengueNet. Geneva, Switzerland: World Health Organization (WHO).

## Mongolia

World Health Organization Regional Office for the Western Pacific. Number of Reported Cases of Dengue Fever and Dengue Hemorrhagic Fever in the Western Pacific Region, by Country 2000.

World Health Organization Regional Office for the Western Pacific. Number of Reported Cases of Dengue Fever and Dengue Hemorrhagic Fever in the Western Pacific Region, by Country 2001.

World Health Organization Regional Office for the Western Pacific. Number of Reported Cases of Dengue Fever and Dengue Hemorrhagic Fever in the Western Pacific Region, by Country 2002.

World Health Organization Regional Office for the Western Pacific. Number of Reported Cases of Dengue Fever and Dengue Hemorrhagic Fever in the Western Pacific Region, by Country 2003.

World Health Organization Regional Office for the Western Pacific. Number of Reported Cases of Dengue Fever and Dengue Hemorrhagic Fever in the Western Pacific Region, by Country 2004.

World Health Organization Regional Office for the Western Pacific. Number of Reported Cases of Dengue Fever and Dengue Hemorrhagic Fever in the Western Pacific Region, by Country 2005.

World Health Organization Regional Office for the Western Pacific. Number of Reported Cases of Dengue Fever and Dengue Hemorrhagic Fever in the Western Pacific Region, by Country 2006.

World Health Organization Regional Office for the Western Pacific. Number of Reported Cases of Dengue Fever and Dengue Hemorrhagic Fever in the Western Pacific Region, by Country 2009.

World Health Organization Regional Office for the Western Pacific. Number of Reported Cases of Dengue Fever and Dengue Hemorrhagic Fever in the Western Pacific Region, by Country 2010.

## Myanmar

WHO Regional Office for South-East Asia (SEARO). WHO South-East Asia Region: Reported Cases and Deaths of Dengue from 2003 to 2012. New Delhi, India: WHO Regional Office for South-East Asia (SEARO), 2013.



World Health Organization Regional Office for South-East Asia (SEARO). Reported Cases of DF/DHF in Selected Countries in SEA Region. New Delhi, India: World Health Organization Regional Office for South-East Asia (SEARO).

## Nepal

WHO Regional Office for South-East Asia (SEARO). WHO South-East Asia Region: Reported Cases and Deaths of Dengue from 2003 to 2012. New Delhi, India: WHO Regional Office for South-East Asia (SEARO), 2013.

World Health Organization (WHO). WHO DengueNet. Geneva, Switzerland: World Health Organization (WHO).

World Health Organization Regional Office for South-East Asia (SEARO). Situation Update of Dengue in the SEA Region, 2010. New Delhi, India: World Health Organization Regional Office for South-East Asia (SEARO).

## New Zealand

World Health Organization (WHO). WHO DengueNet. Geneva, Switzerland: World Health Organization (WHO).

World Health Organization Regional Office for the Western Pacific. Number of Reported Cases of Dengue Fever and Dengue Hemorrhagic Fever in the Western Pacific Region, by Country 2000.

World Health Organization Regional Office for the Western Pacific. Number of Reported Cases of Dengue Fever and Dengue Hemorrhagic Fever in the Western Pacific Region, by Country 2001.

World Health Organization Regional Office for the Western Pacific. Number of Reported Cases of Dengue Fever and Dengue Hemorrhagic Fever in the Western Pacific Region, by Country 2002.

World Health Organization Regional Office for the Western Pacific. Number of Reported Cases of Dengue Fever and Dengue Hemorrhagic Fever in the Western Pacific Region, by Country 2003.

World Health Organization Regional Office for the Western Pacific. Number of Reported Cases of Dengue Fever and Dengue Hemorrhagic Fever in the Western Pacific Region, by Country 2004.

World Health Organization Regional Office for the Western Pacific. Number of Reported Cases of Dengue Fever and Dengue Hemorrhagic Fever in the Western Pacific Region, by Country 2008.

World Health Organization Regional Office for the Western Pacific. Number of Reported Cases of Dengue Fever and Dengue Hemorrhagic Fever in the Western Pacific Region, by Country 2009.

World Health Organization Regional Office for the Western Pacific. Number of Reported Cases of Dengue Fever and Dengue Hemorrhagic Fever in the Western Pacific Region, by Country 2010.

## Nicaragua

Pan American Health Organization (PAHO). Number of Reported Cases of Dengue and Dengue Hemorrhagic Fever (DHF) in the Americas, by Country 2003. Pan American Health Organization (PAHO).

Pan American Health Organization (PAHO). Number of Reported Cases of Dengue and Dengue Hemorrhagic Fever (DHF) in the Americas, by Country 2004. Pan American Health Organization (PAHO).

Pan American Health Organization (PAHO). Number of Reported Cases of Dengue and Dengue Hemorrhagic Fever (DHF) in the Americas, by Country 2005. Pan American Health Organization (PAHO).

Pan American Health Organization (PAHO). Number of Reported Cases of Dengue and Dengue Hemorrhagic Fever (DHF) in the Americas, by Country 2006. Pan American Health Organization (PAHO).

Pan American Health Organization (PAHO). Number of Reported Cases of Dengue and Dengue Hemorrhagic Fever (DHF) in the Americas, by Country 2007. Pan American Health Organization (PAHO).

Pan American Health Organization (PAHO). Number of Reported Cases of Dengue and Severe Dengue (DS) in the Americas, by Country 2008. Pan American Health Organization (PAHO).

Pan American Health Organization (PAHO). Number of Reported Cases of Dengue and Severe Dengue (DS) in the Americas, by Country 2009. Pan American Health Organization (PAHO).

Pan American Health Organization (PAHO). Number of Reported Cases of Dengue and Severe Dengue (DS) in the Americas, by Country 2010. Pan American Health Organization (PAHO).

Pan American Health Organization (PAHO). Number of Reported Cases of Dengue and Severe Dengue (DS) in the Americas, by Country 2011. Pan American Health Organization (PAHO).

Pan American Health Organization (PAHO). Number of Reported Cases of Dengue and Severe Dengue (DS) in the Americas, by Country 2012. Pan American Health Organization (PAHO).

Pan American Health Organization (PAHO). Number of Reported Cases of Dengue and Severe Dengue (DS) in the Americas, by Country 2013. Pan American Health Organization (PAHO).

World Health Organization (WHO). WHO DengueNet. Geneva, Switzerland: World Health Organization (WHO).

## Pakistan

Khan E, Siddiqui J, Shakoor S, Mehraj V, Jamil B, Hasan R. Dengue outbreak in Karachi, Pakistan, 2006: experience at a tertiary care center. *Trans R Soc Trop Med Hyg.* 2007; 101(11): 1114-9.

## Panama

Pan American Health Organization (PAHO). Number of Reported Cases of Dengue and Dengue Hemorrhagic Fever (DHF) in the Americas, by Country 2003. Pan American Health Organization (PAHO).

Pan American Health Organization (PAHO). Number of Reported Cases of Dengue and Dengue Hemorrhagic Fever (DHF) in the Americas, by Country 2004. Pan American Health Organization (PAHO).

Pan American Health Organization (PAHO). Number of Reported Cases of Dengue and Dengue Hemorrhagic Fever (DHF) in the Americas, by Country 2005. Pan American Health Organization (PAHO).

Pan American Health Organization (PAHO). Number of Reported Cases of Dengue and Dengue Hemorrhagic Fever (DHF) in the Americas, by Country 2006. Pan American Health Organization (PAHO).

Pan American Health Organization (PAHO). Number of Reported Cases of Dengue and Dengue Hemorrhagic Fever (DHF) in the Americas, by Country 2007. Pan American Health Organization (PAHO).

Pan American Health Organization (PAHO). Number of Reported Cases of Dengue and Severe Dengue (DS) in the Americas, by Country 2008. Pan American Health Organization (PAHO).

Pan American Health Organization (PAHO). Number of Reported Cases of Dengue and Severe Dengue (DS) in the Americas, by Country 2009. Pan American Health Organization (PAHO).

Pan American Health Organization (PAHO). Number of Reported Cases of Dengue and Severe Dengue (DS) in the Americas, by Country 2010. Pan American Health Organization (PAHO).

Pan American Health Organization (PAHO). Number of Reported Cases of Dengue and Severe Dengue (DS) in the Americas, by Country 2011. Pan American Health Organization (PAHO).

Pan American Health Organization (PAHO). Number of Reported Cases of Dengue and Severe Dengue (DS) in the Americas, by Country 2012. Pan American Health Organization (PAHO).

Pan American Health Organization (PAHO). Number of Reported Cases of Dengue and Severe Dengue (DS) in the Americas, by Country 2013. Pan American Health Organization (PAHO).

World Health Organization (WHO). WHO DengueNet. Geneva, Switzerland: World Health Organization (WHO).

## Papua New Guinea

World Health Organization (WHO). WHO DengueNet. Geneva, Switzerland: World Health Organization (WHO).

World Health Organization Regional Office for the Western Pacific. Number of Reported Cases of Dengue Fever and Dengue Hemorrhagic Fever in the Western Pacific Region, by Country 2009.

## Paraguay

Ministry of Public Health and Welfare (Paraguay). Paraguay - Dengue Control, Prevention, and Mitigation 2010. Asunción, Paraguay: Ministry of Public Health and Welfare (Paraguay).

Pan American Health Organization (PAHO). Number of Reported Cases of Dengue and Dengue Hemorrhagic Fever (DHF) in the Americas, by Country 2003. Pan American Health Organization (PAHO).

Pan American Health Organization (PAHO). Number of Reported Cases of Dengue and Dengue Hemorrhagic Fever (DHF) in the Americas, by Country 2004. Pan American Health Organization (PAHO).

Pan American Health Organization (PAHO). Number of Reported Cases of Dengue and Dengue Hemorrhagic Fever (DHF) in the Americas, by Country 2005. Pan American Health Organization (PAHO).

Pan American Health Organization (PAHO). Number of Reported Cases of Dengue and Dengue Hemorrhagic Fever (DHF) in the Americas, by Country 2006. Pan American Health Organization (PAHO).

Pan American Health Organization (PAHO). Number of Reported Cases of Dengue and Dengue Hemorrhagic Fever (DHF) in the Americas, by Country 2007. Pan American Health Organization (PAHO).

Pan American Health Organization (PAHO). Number of Reported Cases of Dengue and Severe Dengue (DS) in the Americas, by Country 2008. Pan American Health Organization (PAHO).

Pan American Health Organization (PAHO). Number of Reported Cases of Dengue and Severe Dengue (DS) in the Americas, by Country 2009. Pan American Health Organization (PAHO).

Pan American Health Organization (PAHO). Number of Reported Cases of Dengue and Severe Dengue (DS) in the Americas, by Country 2010. Pan American Health Organization (PAHO).

Pan American Health Organization (PAHO). Number of Reported Cases of Dengue and Severe Dengue (DS) in the Americas, by Country 2011. Pan American Health Organization (PAHO).

Pan American Health Organization (PAHO). Number of Reported Cases of Dengue and Severe Dengue (DS) in the Americas, by Country 2012. Pan American Health Organization (PAHO).

Pan American Health Organization (PAHO). Number of Reported Cases of Dengue and Severe Dengue (DS) in the Americas, by Country 2013. Pan American Health Organization (PAHO).

World Health Organization (WHO). WHO DengueNet. Geneva, Switzerland: World Health Organization (WHO).

## Peru

Pan American Health Organization (PAHO). Number of Reported Cases of Dengue and Dengue Hemorrhagic Fever (DHF) in the Americas, by Country 2003. Pan American Health Organization (PAHO).

Pan American Health Organization (PAHO). Number of Reported Cases of Dengue and Dengue Hemorrhagic Fever (DHF) in the Americas, by Country 2005. Pan American Health Organization (PAHO).

Pan American Health Organization (PAHO). Number of Reported Cases of Dengue and Dengue Hemorrhagic Fever (DHF) in the Americas, by Country 2006. Pan American Health Organization (PAHO).

Pan American Health Organization (PAHO). Number of Reported Cases of Dengue and Dengue Hemorrhagic Fever (DHF) in the Americas, by Country 2007. Pan American Health Organization (PAHO).

Pan American Health Organization (PAHO). Number of Reported Cases of Dengue and Severe Dengue (DS) in the Americas, by Country 2008. Pan American Health Organization (PAHO).

Pan American Health Organization (PAHO). Number of Reported Cases of Dengue and Severe Dengue (DS) in the Americas, by Country 2009. Pan American Health Organization (PAHO).

Pan American Health Organization (PAHO). Number of Reported Cases of Dengue and Severe Dengue (DS) in the Americas, by Country 2010. Pan American Health Organization (PAHO).

Pan American Health Organization (PAHO). Number of Reported Cases of Dengue and Severe Dengue (DS) in the Americas, by Country 2011. Pan American Health Organization (PAHO).

Pan American Health Organization (PAHO). Number of Reported Cases of Dengue and Severe Dengue (DS) in the Americas, by Country 2012. Pan American Health Organization (PAHO).

Pan American Health Organization (PAHO). Number of Reported Cases of Dengue and Severe Dengue (DS) in the Americas, by Country 2013. Pan American Health Organization (PAHO).

Rocha C, Morrison AC, Forshey BM, Blair PJ, Olson JG, Stancil JD, Sihuincha M, Scott TW, Kochel TJ. Comparison of two active surveillance programs for the detection of clinical dengue cases in Iquitos, Peru. *Am J Trop Med Hyg.* 2009; 80(4): 656-60.

World Health Organization (WHO). WHO DengueNet. Geneva, Switzerland: World Health Organization (WHO).

## Philippines

World Health Organization (WHO). WHO DengueNet. Geneva, Switzerland: World Health Organization (WHO).

World Health Organization Regional Office for the Western Pacific. Number of Reported Cases of Dengue Fever and Dengue Hemorrhagic Fever in the Western Pacific Region, by Country 2000.

World Health Organization Regional Office for the Western Pacific. Number of Reported Cases of Dengue Fever and Dengue Hemorrhagic Fever in the Western Pacific Region, by Country 2001.

World Health Organization Regional Office for the Western Pacific. Number of Reported Cases of Dengue Fever and Dengue Hemorrhagic Fever in the Western Pacific Region, by Country 2002.

World Health Organization Regional Office for the Western Pacific. Number of Reported Cases of Dengue Fever and Dengue Hemorrhagic Fever in the Western Pacific Region, by Country 2003.

World Health Organization Regional Office for the Western Pacific. Number of Reported Cases of Dengue Fever and Dengue Hemorrhagic Fever in the Western Pacific Region, by Country 2004.

World Health Organization Regional Office for the Western Pacific. Number of Reported Cases of Dengue Fever and Dengue Hemorrhagic Fever in the Western Pacific Region, by Country 2005.

World Health Organization Regional Office for the Western Pacific. Number of Reported Cases of Dengue Fever and Dengue Hemorrhagic Fever in the Western Pacific Region, by Country 2006.

World Health Organization Regional Office for the Western Pacific. Number of Reported Cases of Dengue Fever and Dengue Hemorrhagic Fever in the Western Pacific Region, by Country 2007.

World Health Organization Regional Office for the Western Pacific. Number of Reported Cases of Dengue Fever and Dengue Hemorrhagic Fever in the Western Pacific Region, by Country 2008.

World Health Organization Regional Office for the Western Pacific. Number of Reported Cases of Dengue Fever and Dengue Hemorrhagic Fever in the Western Pacific Region, by Country 2009.

World Health Organization Regional Office for the Western Pacific. Number of Reported Cases of Dengue Fever and Dengue Hemorrhagic Fever in the Western Pacific Region, by Country 2010.

#### Saint Lucia

Pan American Health Organization (PAHO). Number of Reported Cases of Dengue and Severe Dengue (DS) in the Americas, by Country 2008. Pan American Health Organization (PAHO).

Pan American Health Organization (PAHO). Number of Reported Cases of Dengue and Severe Dengue (DS) in the Americas, by Country 2009. Pan American Health Organization (PAHO).

Pan American Health Organization (PAHO). Number of Reported Cases of Dengue and Severe Dengue (DS) in the Americas, by Country 2010. Pan American Health Organization (PAHO).

Pan American Health Organization (PAHO). Number of Reported Cases of Dengue and Severe Dengue (DS) in the Americas, by Country 2011. Pan American Health Organization (PAHO).

Pan American Health Organization (PAHO). Number of Reported Cases of Dengue and Severe Dengue (DS) in the Americas, by Country 2012. Pan American Health Organization (PAHO).

Pan American Health Organization (PAHO). Number of Reported Cases of Dengue and Severe Dengue (DS) in the Americas, by Country 2013. Pan American Health Organization (PAHO).

World Health Organization (WHO). WHO DengueNet. Geneva, Switzerland: World Health Organization (WHO).

#### Saint Vincent and the Grenadines

Pan American Health Organization (PAHO). Number of Reported Cases of Dengue and Severe Dengue (DS) in the Americas, by Country 2008. Pan American Health Organization (PAHO).

Pan American Health Organization (PAHO). Number of Reported Cases of Dengue and Severe Dengue (DS) in the Americas, by Country 2009. Pan American Health Organization (PAHO).

Pan American Health Organization (PAHO). Number of Reported Cases of Dengue and Severe Dengue (DS) in the Americas, by Country 2010. Pan American Health Organization (PAHO).

Pan American Health Organization (PAHO). Number of Reported Cases of Dengue and Severe Dengue (DS) in the Americas, by Country 2011. Pan American Health Organization (PAHO).

Pan American Health Organization (PAHO). Number of Reported Cases of Dengue and Severe Dengue (DS) in the Americas, by Country 2012. Pan American Health Organization (PAHO).

Pan American Health Organization (PAHO). Number of Reported Cases of Dengue and Severe Dengue (DS) in the Americas, by Country 2013. Pan American Health Organization (PAHO).

World Health Organization (WHO). WHO DengueNet. Geneva, Switzerland: World Health Organization (WHO).

## Samoa

World Health Organization (WHO). WHO DengueNet. Geneva, Switzerland: World Health Organization (WHO).

World Health Organization Regional Office for the Western Pacific. Number of Reported Cases of Dengue Fever and Dengue Hemorrhagic Fever in the Western Pacific Region, by Country 2000.

World Health Organization Regional Office for the Western Pacific. Number of Reported Cases of Dengue Fever and Dengue Hemorrhagic Fever in the Western Pacific Region, by Country 2001.

World Health Organization Regional Office for the Western Pacific. Number of Reported Cases of Dengue Fever and Dengue Hemorrhagic Fever in the Western Pacific Region, by Country 2002.

World Health Organization Regional Office for the Western Pacific. Number of Reported Cases of Dengue Fever and Dengue Hemorrhagic Fever in the Western Pacific Region, by Country 2003.

World Health Organization Regional Office for the Western Pacific. Number of Reported Cases of Dengue Fever and Dengue Hemorrhagic Fever in the Western Pacific Region, by Country 2004.

World Health Organization Regional Office for the Western Pacific. Number of Reported Cases of Dengue Fever and Dengue Hemorrhagic Fever in the Western Pacific Region, by Country 2005.

World Health Organization Regional Office for the Western Pacific. Number of Reported Cases of Dengue Fever and Dengue Hemorrhagic Fever in the Western Pacific Region, by Country 2006.

World Health Organization Regional Office for the Western Pacific. Number of Reported Cases of Dengue Fever and Dengue Hemorrhagic Fever in the Western Pacific Region, by Country 2007.

World Health Organization Regional Office for the Western Pacific. Number of Reported Cases of Dengue Fever and Dengue Hemorrhagic Fever in the Western Pacific Region, by Country 2008.

World Health Organization Regional Office for the Western Pacific. Number of Reported Cases of Dengue Fever and Dengue Hemorrhagic Fever in the Western Pacific Region, by Country 2010.

## Saudi Arabia

Fakeeh M, Zaki A. Dengue in Jeddah, Saudi Arabia, 1994-2002. *Dengue Bull.* 2003; 27: 13–8.

World Health Organization (WHO). WHO DengueNet. Geneva, Switzerland: World Health Organization (WHO).

## Senegal

Monlun E, Zeller H, Traore-Lamizana M, Hervy JP, Adam F, Mondo M, Digoutte JP. Caractères cliniques et épidémiologiques de la dengue 2 au Sénégal. *Med Mal Infect.* 1992; 22(8-9): 718-21.

## Singapore

World Health Organization (WHO). WHO DengueNet. Geneva, Switzerland: World Health Organization (WHO).

World Health Organization Regional Office for the Western Pacific. Number of Reported Cases of Dengue Fever and Dengue Hemorrhagic Fever in the Western Pacific Region, by Country 2000.

World Health Organization Regional Office for the Western Pacific. Number of Reported Cases of Dengue Fever and Dengue Hemorrhagic Fever in the Western Pacific Region, by Country 2001.

World Health Organization Regional Office for the Western Pacific. Number of Reported Cases of Dengue Fever and Dengue Hemorrhagic Fever in the Western Pacific Region, by Country 2002.

World Health Organization Regional Office for the Western Pacific. Number of Reported Cases of Dengue Fever and Dengue Hemorrhagic Fever in the Western Pacific Region, by Country 2003.

World Health Organization Regional Office for the Western Pacific. Number of Reported Cases of Dengue Fever and Dengue Hemorrhagic Fever in the Western Pacific Region, by Country 2004.

World Health Organization Regional Office for the Western Pacific. Number of Reported Cases of Dengue Fever and Dengue Hemorrhagic Fever in the Western Pacific Region, by Country 2005.

World Health Organization Regional Office for the Western Pacific. Number of Reported Cases of Dengue Fever and Dengue Hemorrhagic Fever in the Western Pacific Region, by Country 2006.

World Health Organization Regional Office for the Western Pacific. Number of Reported Cases of Dengue Fever and Dengue Hemorrhagic Fever in the Western Pacific Region, by Country 2007.

World Health Organization Regional Office for the Western Pacific. Number of Reported Cases of Dengue Fever and Dengue Hemorrhagic Fever in the Western Pacific Region, by Country 2008.

World Health Organization Regional Office for the Western Pacific. Number of Reported Cases of Dengue Fever and Dengue Hemorrhagic Fever in the Western Pacific Region, by Country 2009.

World Health Organization Regional Office for the Western Pacific. Number of Reported Cases of Dengue Fever and Dengue Hemorrhagic Fever in the Western Pacific Region, by Country 2010.

## Solomon Islands

World Health Organization (WHO). WHO DengueNet. Geneva, Switzerland: World Health Organization (WHO).





World Health Organization Regional Office for the Western Pacific. Number of Reported Cases of Dengue Fever and Dengue Hemorrhagic Fever in the Western Pacific Region, by Country 2010.

#### Sri Lanka

WHO Regional Office for South-East Asia (SEARO). WHO South-East Asia Region: Reported Cases and Deaths of Dengue from 2003 to 2012. New Delhi, India: WHO Regional Office for South-East Asia (SEARO), 2013.

World Health Organization Regional Office for South-East Asia (SEARO). Reported Cases of DF/DHF in Selected Countries in SEA Region. New Delhi, India: World Health Organization Regional Office for South-East Asia (SEARO).

World Health Organization Regional Office for South-East Asia (SEARO). Situation Update of Dengue in the SEA Region, 2010. New Delhi, India: World Health Organization Regional Office for South-East Asia (SEARO).

#### Sudan

World Health Organization (WHO). Report of the WHO Strategic and Technical Advisory Group for Neglected Tropical Diseases (STAG-NTD) 2010. Geneva, Switzerland: World Health Organization (WHO), 2010.

#### Suriname

Pan American Health Organization (PAHO). Number of Reported Cases of Dengue and Severe Dengue (DS) in the Americas, by Country 2008. Pan American Health Organization (PAHO).

Pan American Health Organization (PAHO). Number of Reported Cases of Dengue and Severe Dengue (DS) in the Americas, by Country 2009. Pan American Health Organization (PAHO).

Pan American Health Organization (PAHO). Number of Reported Cases of Dengue and Severe Dengue (DS) in the Americas, by Country 2010. Pan American Health Organization (PAHO).

Pan American Health Organization (PAHO). Number of Reported Cases of Dengue and Severe Dengue (DS) in the Americas, by Country 2011. Pan American Health Organization (PAHO).

Pan American Health Organization (PAHO). Number of Reported Cases of Dengue and Severe Dengue (DS) in the Americas, by Country 2012. Pan American Health Organization (PAHO).

Pan American Health Organization (PAHO). Number of Reported Cases of Dengue and Severe Dengue (DS) in the Americas, by Country 2013. Pan American Health Organization (PAHO).

World Health Organization (WHO). WHO DengueNet. Geneva, Switzerland: World Health Organization (WHO).

#### Taiwan

Lin C-C, Huang Y-H, Shu P-Y, Wu H-S, Lin Y-S, Yeh T-M, Liu H-S, Liu C-C, Lei H-Y. Characteristic of dengue disease in Taiwan: 2002-2007. *Am J Trop Med Hyg.* 2010; 82(4): 731-9.

#### Thailand

Bureau of Epidemiology (Thailand). Thailand Annual Epidemiological Surveillance Report 2009. Nonthaburi, Thailand: Bureau of Epidemiology (Thailand), 2010.

WHO Regional Office for South-East Asia (SEARO). WHO South-East Asia Region: Reported Cases and Deaths of Dengue from 2003 to 2012. New Delhi, India: WHO Regional Office for South-East Asia (SEARO), 2013.

World Health Organization Regional Office for South-East Asia (SEARO). Reported Cases of DF/DHF in Selected Countries in SEA Region. New Delhi, India: World Health Organization Regional Office for South-East Asia (SEARO).

#### The Bahamas

Pan American Health Organization (PAHO). Number of Reported Cases of Dengue and Severe Dengue (DS) in the Americas, by Country 2008. Pan American Health Organization (PAHO).

Pan American Health Organization (PAHO). Number of Reported Cases of Dengue and Severe Dengue (DS) in the Americas, by Country 2009. Pan American Health Organization (PAHO).

Pan American Health Organization (PAHO). Number of Reported Cases of Dengue and Severe Dengue (DS) in the Americas, by Country 2010. Pan American Health Organization (PAHO).

Pan American Health Organization (PAHO). Number of Reported Cases of Dengue and Severe Dengue (DS) in the Americas, by Country 2011. Pan American Health Organization (PAHO).

Pan American Health Organization (PAHO). Number of Reported Cases of Dengue and Severe Dengue (DS) in the Americas, by Country 2012. Pan American Health Organization (PAHO).

Pan American Health Organization (PAHO). Number of Reported Cases of Dengue and Severe Dengue (DS) in the Americas, by Country 2013. Pan American Health Organization (PAHO).

World Health Organization (WHO). WHO DengueNet. Geneva, Switzerland: World Health Organization (WHO).

#### Timor-Leste

WHO Regional Office for South-East Asia (SEARO). WHO South-East Asia Region: Reported Cases and Deaths of Dengue from 2003 to 2012. New Delhi, India: WHO Regional Office for South-East Asia (SEARO), 2013.

World Health Organization Regional Office for South-East Asia (SEARO). Reported Cases of DF/DHF in Selected Countries in SEA Region. New Delhi, India: World Health Organization Regional Office for South-East Asia (SEARO).

World Health Organization Regional Office for South-East Asia (SEARO). Situation Update of Dengue in the SEA Region, 2010. New Delhi, India: World Health Organization Regional Office for South-East Asia (SEARO).

## Tonga

World Health Organization (WHO). WHO DengueNet. Geneva, Switzerland: World Health Organization (WHO).

World Health Organization Regional Office for the Western Pacific. Number of Reported Cases of Dengue Fever and Dengue Hemorrhagic Fever in the Western Pacific Region, by Country 2000.

World Health Organization Regional Office for the Western Pacific. Number of Reported Cases of Dengue Fever and Dengue Hemorrhagic Fever in the Western Pacific Region, by Country 2001.

World Health Organization Regional Office for the Western Pacific. Number of Reported Cases of Dengue Fever and Dengue Hemorrhagic Fever in the Western Pacific Region, by Country 2002.

World Health Organization Regional Office for the Western Pacific. Number of Reported Cases of Dengue Fever and Dengue Hemorrhagic Fever in the Western Pacific Region, by Country 2003.

World Health Organization Regional Office for the Western Pacific. Number of Reported Cases of Dengue Fever and Dengue Hemorrhagic Fever in the Western Pacific Region, by Country 2004.

World Health Organization Regional Office for the Western Pacific. Number of Reported Cases of Dengue Fever and Dengue Hemorrhagic Fever in the Western Pacific Region, by Country 2007.

World Health Organization Regional Office for the Western Pacific. Number of Reported Cases of Dengue Fever and Dengue Hemorrhagic Fever in the Western Pacific Region, by Country 2008.

World Health Organization Regional Office for the Western Pacific. Number of Reported Cases of Dengue Fever and Dengue Hemorrhagic Fever in the Western Pacific Region, by Country 2009.

World Health Organization Regional Office for the Western Pacific. Number of Reported Cases of Dengue Fever and Dengue Hemorrhagic Fever in the Western Pacific Region, by Country 2010.

## Trinidad and Tobago

Pan American Health Organization (PAHO). Number of Reported Cases of Dengue and Severe Dengue (DS) in the Americas, by Country 2008. Pan American Health Organization (PAHO).

Pan American Health Organization (PAHO). Number of Reported Cases of Dengue and Severe Dengue (DS) in the Americas, by Country 2009. Pan American Health Organization (PAHO).

Pan American Health Organization (PAHO). Number of Reported Cases of Dengue and Severe Dengue (DS) in the Americas, by Country 2010. Pan American Health Organization (PAHO).

Pan American Health Organization (PAHO). Number of Reported Cases of Dengue and Severe Dengue (DS) in the Americas, by Country 2011. Pan American Health Organization (PAHO).

Pan American Health Organization (PAHO). Number of Reported Cases of Dengue and Severe Dengue (DS) in the Americas, by Country 2012. Pan American Health Organization (PAHO).

Pan American Health Organization (PAHO). Number of Reported Cases of Dengue and Severe Dengue (DS) in the Americas, by Country 2013. Pan American Health Organization (PAHO).

World Health Organization (WHO). WHO DengueNet. Geneva, Switzerland: World Health Organization (WHO).

#### United Kingdom

Cunningham R, Mutton K. Dengue haemorrhagic fever. *BMJ*. 1991; 302(6784): 1083-4.

#### United States

Effler PV, Pang L, Kitsutani P, Vorndam V, Nakata M, Ayers T, Elm J, Tom T, Reiter P, Rigau-Perez JG, Hayes JM, Mills K, Napier M, Clark GG, Gubler DJ. Dengue fever, Hawaii, 2001-2002. *Emerg Infect Dis*. 2005; 11(5): 742-9.

Pan American Health Organization (PAHO). Number of Reported Cases of Dengue and Severe Dengue (DS) in the Americas, by Country 2009. Pan American Health Organization (PAHO).

Pan American Health Organization (PAHO). Number of Reported Cases of Dengue and Severe Dengue (DS) in the Americas, by Country 2010. Pan American Health Organization (PAHO).

Pan American Health Organization (PAHO). Number of Reported Cases of Dengue and Severe Dengue (DS) in the Americas, by Country 2011. Pan American Health Organization (PAHO).

Pan American Health Organization (PAHO). Number of Reported Cases of Dengue and Severe Dengue (DS) in the Americas, by Country 2012. Pan American Health Organization (PAHO).

Pan American Health Organization (PAHO). Number of Reported Cases of Dengue and Severe Dengue (DS) in the Americas, by Country 2013. Pan American Health Organization (PAHO).

Rawlings JA, Hendricks KA, Burgess CR, Campman RM, Clark GG, Tabony LJ, Patterson MA. Dengue surveillance in Texas, 1995. *Am J Trop Med Hyg*. 1998; 59(1): 95-9.

#### Uruguay

Pan American Health Organization (PAHO). Number of Reported Cases of Dengue and Severe Dengue (DS) in the Americas, by Country 2008. Pan American Health Organization (PAHO).

Pan American Health Organization (PAHO). Number of Reported Cases of Dengue and Severe Dengue (DS) in the Americas, by Country 2009. Pan American Health Organization (PAHO).

Pan American Health Organization (PAHO). Number of Reported Cases of Dengue and Severe Dengue (DS) in the Americas, by Country 2010. Pan American Health Organization (PAHO).

Pan American Health Organization (PAHO). Number of Reported Cases of Dengue and Severe Dengue (DS) in the Americas, by Country 2011. Pan American Health Organization (PAHO).

Pan American Health Organization (PAHO). Number of Reported Cases of Dengue and Severe Dengue (DS) in the Americas, by Country 2012. Pan American Health Organization (PAHO).

Pan American Health Organization (PAHO). Number of Reported Cases of Dengue and Severe Dengue (DS) in the Americas, by Country 2013. Pan American Health Organization (PAHO).

World Health Organization (WHO). WHO DengueNet. Geneva, Switzerland: World Health Organization (WHO).

#### Vanuatu

Taleo G, Capuano C, Burkot T. Dengue Control in Vanuatu: Towards an Integrated Vertical and Horizontal Control Programme. Dengue Bull. 2000; 24; 11-7.

World Health Organization (WHO). WHO DengueNet. Geneva, Switzerland: World Health Organization (WHO).

World Health Organization Regional Office for the Western Pacific. Number of Reported Cases of Dengue Fever and Dengue Hemorrhagic Fever in the Western Pacific Region, by Country 2000.

World Health Organization Regional Office for the Western Pacific. Number of Reported Cases of Dengue Fever and Dengue Hemorrhagic Fever in the Western Pacific Region, by Country 2001.

World Health Organization Regional Office for the Western Pacific. Number of Reported Cases of Dengue Fever and Dengue Hemorrhagic Fever in the Western Pacific Region, by Country 2002.

World Health Organization Regional Office for the Western Pacific. Number of Reported Cases of Dengue Fever and Dengue Hemorrhagic Fever in the Western Pacific Region, by Country 2003.

World Health Organization Regional Office for the Western Pacific. Number of Reported Cases of Dengue Fever and Dengue Hemorrhagic Fever in the Western Pacific Region, by Country 2004.

World Health Organization Regional Office for the Western Pacific. Number of Reported Cases of Dengue Fever and Dengue Hemorrhagic Fever in the Western Pacific Region, by Country 2005.

World Health Organization Regional Office for the Western Pacific. Number of Reported Cases of Dengue Fever and Dengue Hemorrhagic Fever in the Western Pacific Region, by Country 2006.

World Health Organization Regional Office for the Western Pacific. Number of Reported Cases of Dengue Fever and Dengue Hemorrhagic Fever in the Western Pacific Region, by Country 2007.

World Health Organization Regional Office for the Western Pacific. Number of Reported Cases of Dengue Fever and Dengue Hemorrhagic Fever in the Western Pacific Region, by Country 2008.

World Health Organization Regional Office for the Western Pacific. Number of Reported Cases of Dengue Fever and Dengue Hemorrhagic Fever in the Western Pacific Region, by Country 2009.

World Health Organization Regional Office for the Western Pacific. Number of Reported Cases of Dengue Fever and Dengue Hemorrhagic Fever in the Western Pacific Region, by Country 2010.

#### Venezuela

Pan American Health Organization (PAHO). Number of Reported Cases of Dengue and Dengue Hemorrhagic Fever (DHF) in the Americas, by Country 2003. Pan American Health Organization (PAHO).

Pan American Health Organization (PAHO). Number of Reported Cases of Dengue and Dengue Hemorrhagic Fever (DHF) in the Americas, by Country 2004. Pan American Health Organization (PAHO).

Pan American Health Organization (PAHO). Number of Reported Cases of Dengue and Dengue Hemorrhagic Fever (DHF) in the Americas, by Country 2005. Pan American Health Organization (PAHO).

Pan American Health Organization (PAHO). Number of Reported Cases of Dengue and Dengue Hemorrhagic Fever (DHF) in the Americas, by Country 2006. Pan American Health Organization (PAHO).

Pan American Health Organization (PAHO). Number of Reported Cases of Dengue and Dengue Hemorrhagic Fever (DHF) in the Americas, by Country 2007. Pan American Health Organization (PAHO).

Pan American Health Organization (PAHO). Number of Reported Cases of Dengue and Severe Dengue (DS) in the Americas, by Country 2008. Pan American Health Organization (PAHO).

Pan American Health Organization (PAHO). Number of Reported Cases of Dengue and Severe Dengue (DS) in the Americas, by Country 2009. Pan American Health Organization (PAHO).

Pan American Health Organization (PAHO). Number of Reported Cases of Dengue and Severe Dengue (DS) in the Americas, by Country 2010. Pan American Health Organization (PAHO).

Pan American Health Organization (PAHO). Number of Reported Cases of Dengue and Severe Dengue (DS) in the Americas, by Country 2011. Pan American Health Organization (PAHO).

Pan American Health Organization (PAHO). Number of Reported Cases of Dengue and Severe Dengue (DS) in the Americas, by Country 2012. Pan American Health Organization (PAHO).

Pan American Health Organization (PAHO). Number of Reported Cases of Dengue and Severe Dengue (DS) in the Americas, by Country 2013. Pan American Health Organization (PAHO).

World Health Organization (WHO). WHO DengueNet. Geneva, Switzerland: World Health Organization (WHO).

## Vietnam

World Health Organization (WHO). WHO DengueNet. Geneva, Switzerland: World Health Organization (WHO).

World Health Organization Regional Office for the Western Pacific. Number of Reported Cases of Dengue Fever and Dengue Hemorrhagic Fever in the Western Pacific Region, by Country 2000.

World Health Organization Regional Office for the Western Pacific. Number of Reported Cases of Dengue Fever and Dengue Hemorrhagic Fever in the Western Pacific Region, by Country 2001.

World Health Organization Regional Office for the Western Pacific. Number of Reported Cases of Dengue Fever and Dengue Hemorrhagic Fever in the Western Pacific Region, by Country 2002.

World Health Organization Regional Office for the Western Pacific. Number of Reported Cases of Dengue Fever and Dengue Hemorrhagic Fever in the Western Pacific Region, by Country 2003.

World Health Organization Regional Office for the Western Pacific. Number of Reported Cases of Dengue Fever and Dengue Hemorrhagic Fever in the Western Pacific Region, by Country 2004.

World Health Organization Regional Office for the Western Pacific. Number of Reported Cases of Dengue Fever and Dengue Hemorrhagic Fever in the Western Pacific Region, by Country 2005.

World Health Organization Regional Office for the Western Pacific. Number of Reported Cases of Dengue Fever and Dengue Hemorrhagic Fever in the Western Pacific Region, by Country 2006.

World Health Organization Regional Office for the Western Pacific. Number of Reported Cases of Dengue Fever and Dengue Hemorrhagic Fever in the Western Pacific Region, by Country 2007.

World Health Organization Regional Office for the Western Pacific. Number of Reported Cases of Dengue Fever and Dengue Hemorrhagic Fever in the Western Pacific Region, by Country 2008.

World Health Organization Regional Office for the Western Pacific. Number of Reported Cases of Dengue Fever and Dengue Hemorrhagic Fever in the Western Pacific Region, by Country 2009.

World Health Organization Regional Office for the Western Pacific. Number of Reported Cases of Dengue Fever and Dengue Hemorrhagic Fever in the Western Pacific Region, by Country 2010.

#### Yemen

WHO Regional Office for the Eastern Mediterranean. Outbreak of Dengue Fever in Yemen 2005. Div Commun Disease Control Newsl. 2005; 5: 6.



## Appendix E: Changes in mortality estimates from GBD 2010

Globally, GBD 2013 estimates of dengue mortality were lower than they were for GBD 2010. Most of the reduction comes from changes in non-endemic regions (e.g. Western Europe) and in regions of marginal endemicity (e.g. East Asia). Estimates have increased for several hyper-endemic regions, including Andean Latin America, Oceania, South and Southeast Asia, and Tropical Latin America (Table S5).

**Table S5:** Change in the estimates of the absolute number of dengue deaths between GBD 2010 and GBD 2013, by region and year. Positive numbers indicate that dengue mortality estimates for a given year and region were higher for GBD 2013 than GBD 2010, and negative numbers indicate that our GBD 2013 estimates were lower.

| Region                       | 1990         | 1995         | 2000         | 2005         | 2010         | All years     |
|------------------------------|--------------|--------------|--------------|--------------|--------------|---------------|
| Andean Latin America         | 31           | 13           | 6            | 1            | -4           | <b>47</b>     |
| Australasia                  | -31          | -31          | -30          | -31          | -33          | <b>-155</b>   |
| Caribbean                    | -172         | -155         | -163         | -174         | -163         | <b>-828</b>   |
| Central Asia                 | -90          | -106         | -96          | -91          | -91          | <b>-474</b>   |
| Central Europe               | -124         | -168         | -177         | -177         | -182         | <b>-828</b>   |
| Central Latin America        | 8            | -15          | 15           | -98          | 10           | <b>-79</b>    |
| Central Sub-Saharan Africa   | -82          | -96          | -94          | -106         | -141         | <b>-519</b>   |
| East Asia                    | -832         | -886         | -1021        | -984         | -947         | <b>-4671</b>  |
| Eastern Europe               | -200         | -232         | -203         | -201         | -190         | <b>-1025</b>  |
| Eastern Sub-Saharan Africa   | -423         | -432         | -384         | -376         | -389         | <b>-2004</b>  |
| High-income Asia Pacific     | -139         | -149         | -159         | -169         | -187         | <b>-804</b>   |
| High-income North America    | 18           | 19           | 19           | 18           | 16           | <b>90</b>     |
| North Africa and Middle East | -879         | -806         | -631         | -647         | -704         | <b>-3667</b>  |
| Oceania                      | 49           | 57           | 61           | 47           | 45           | <b>260</b>    |
| South Asia                   | 71           | 106          | 149          | 525          | 359          | <b>1210</b>   |
| Southeast Asia               | 1693         | 986          | 451          | 1184         | -53          | <b>4263</b>   |
| Southern Latin America       | 5            | -1           | -9           | -15          | -17          | <b>-37</b>    |
| Southern Sub-Saharan Africa  | -10          | -17          | -27          | -33          | -31          | <b>-118</b>   |
| Tropical Latin America       | 0            | 1            | -3           | 37           | 111          | <b>146</b>    |
| Western Europe               | -1093        | -1172        | -1214        | -1231        | -1278        | <b>-5989</b>  |
| Western Sub-Saharan Africa   | -403         | -432         | -380         | -342         | -395         | <b>-1953</b>  |
| <b>All regions</b>           | <b>-2602</b> | <b>-3517</b> | <b>-3891</b> | <b>-2863</b> | <b>-4265</b> | <b>-17137</b> |

To look at this another way, we have informally categorized countries by dengue endemicity, based on the population-weighted probability of dengue transmission (derived from Bhatt et al<sup>2</sup>). Here we developed four categories: non-endemic (dengue probability = 0), low-endemic (lower 50<sup>th</sup> percentile of dengue probability or dengue probability between 0 and 45.5%), high-endemic (upper 50<sup>th</sup> percentile of dengue probability or dengue probability greater than 45.5%), and China. We report China separately 1) because it was the country with the greatest absolute change in dengue mortality estimates between GBD 2010 and GBD 2013, and 2) because it is the country for which we acquired the largest amount of new mortality data for GBD 2013. GBD 2013 estimates for high-endemic countries are higher for all years than were those for GBD 2010, and those for other categories are lower. Most of the decline in global estimates comes from declines in China and non-endemic countries (Table S6).

**Table S6:** Change in estimated number of dengue deaths between GBD 2010 and GBD 2013, by category of endemicity and year. Positive numbers indicate that dengue mortality estimates for a given year and category were higher for GBD 2013 than GBD 2010, and negative numbers indicate that our GBD 2013 estimates were lower.

| Category     | 1990         | 1995         | 2000         | 2005         | 2010         | All years     |
|--------------|--------------|--------------|--------------|--------------|--------------|---------------|
| Non-endemic  | -2216        | -2320        | -2247        | -2296        | -2396        | <b>-11474</b> |
| Low-endemic  | -1093        | -1221        | -1081        | -987         | -2353        | <b>-6736</b>  |
| High-endemic | 1508         | 869          | 403          | 1339         | 1357         | <b>5476</b>   |
| China        | -801         | -845         | -966         | -919         | -872         | <b>-4403</b>  |
| <b>Total</b> | <b>-2602</b> | <b>-3517</b> | <b>-3891</b> | <b>-2863</b> | <b>-4265</b> | <b>-17137</b> |

## References

- 1 Foreman KJ, Lozano R, Lopez AD, Murray CJ. Modeling causes of death: an integrated approach using CODEm. *Popul Health Metr* 2012; **10**: 1.
- 2 Bhatt S, Gething PW, Brady OJ, *et al.* The global distribution and burden of dengue. *Nature* 2013; 496, 504–507. DOI:10.1038/nature12060.
- 3 Center for International Earth Science Information Network, Columbia University (CIESIN), Food and Agriculture Organization of the United Nations (FAO), International Center for Tropical Agriculture (CIAT). Gridded Population of the World Version 3 (GPWv3): Population Density Grids. Palisades, NY: Socioeconomic Data and Applications Center (SEDAC), Columbia University, 2005.
- 4 World Bank. Country and Lending Groups | Data. 2013; published online Oct 22. [http://data.worldbank.org/about/country-and-lending-groups#Low\\_income](http://data.worldbank.org/about/country-and-lending-groups#Low_income).
- 5 Wichmann O, Yoon I-K, Vong S, *et al.* Dengue in Thailand and Cambodia: An Assessment of the Degree of Underrecognized Disease Burden Based on Reported Cases. *PLoS Negl Trop Dis* 2011; **5**. DOI:10.1371/journal.pntd.0000996.
- 6 Tien NTK, Luxemburger C, Toan NT, *et al.* A prospective cohort study of dengue infection in schoolchildren in Long Xuyen, Viet Nam. *Trans R Soc Trop Med Hyg* 2010; **104**: 592–600.
- 7 Anderson KB, Chunsuttiwat S, Nisalak A, *et al.* Burden of symptomatic dengue infection in children at primary school in Thailand: a prospective study. *The Lancet* 2007; **369**: 1452–9.
- 8 Porter KR, Beckett CG, Kosasih H, *et al.* Epidemiology of Dengue and Dengue Hemorrhagic Fever in a Cohort of Adults Living in Bandung, West Java, Indonesia. *Am J Trop Med Hyg* 2005; **72**: 60–6.
- 9 Vong S, Goyet S, Ly S, *et al.* Under-recognition and reporting of dengue in Cambodia: a capture–recapture analysis of the National Dengue Surveillance System. *Epidemiol Infect* 2012; **140**: 491–9.
- 10 Undurraga EA, Halasa YA, Shepard DS. Use of Expansion Factors to Estimate the Burden of Dengue in Southeast Asia: A Systematic Analysis. *PLoS Negl Trop Dis* 2013; **7**: e2056.
- 11 Shepard DS, Undurraga EA, Lees RS, Halasa Y, Lum LCS, Ng CW. Use of Multiple Data Sources to Estimate the Economic Cost of Dengue Illness in Malaysia. *Am J Trop Med Hyg* 2012; **87**: 796–805.
- 12 Shepard DS, Coudeville L, Halasa YA, Zambrano B, Dayan GH. Economic Impact of Dengue Illness in the Americas. *Am J Trop Med Hyg* 2011; **84**: 200–7.
- 13 Standish K, Kuan G, Aviles W, Balmaseda A, Harris E. High Dengue Case Capture Rate in Four Years of a Cohort Study in Nicaragua Compared to National Surveillance Data. *PLoS Negl Trop Dis* 2010; **4**. DOI:10.1371/journal.pntd.0000633.
- 14 Ministry of Health (Brazil). Brazil Hospital Information System. Rio de Janeiro, Brazil: Ministry of Health (Brazil).
- 15 GBD 2013 Mortality and Causes of Death Collaborators. Global, regional, and national age–sex specific all-cause and cause-specific mortality for 240 causes of death, 1990–2013: a systematic analysis for the Global Burden of Disease Study 2013. *The Lancet* 2015; **385**: 117–71.
- 16 Salomon JA. New disability weights for the global burden of disease. *Bull World Health Organ* 2010; **88**: 879.

- 17 Haagsma JA, Noordhout CM de, Polinder S, *et al.* Assessing disability weights based on the responses of 30,660 people from four European countries. *Popul Health Metr* 2015; **13**: 10.
- 18 Whitehead SS, Blaney JE, Durbin AP, Murphy BR. Prospects for a dengue virus vaccine. *Nat Rev Microbiol* 2007; **5**: 518–28.
- 19 Teixeira L de AS, Lopes JSM, Martins AG da C, Campos FAB, Miranzi S de SC, Nascentes GAN. Persistence of dengue symptoms in patients in Uberaba, Minas Gerais State, Brazil. *Cad Saúde Pública* 2010; **26**: 624–30.
- 20 Vos, Theo *et al.* Global, regional, and national incidence, prevalence, and years lived with disability for 301 acute and chronic diseases and injuries in 188 countries, 1990–2013: a systematic analysis for the Global Burden of Disease Study 2013. *Lancet* 2015, 386, 743-800.
- 21 Villar L, Dayan GH, Arredondo-García JL, *et al.* Efficacy of a Tetravalent Dengue Vaccine in Children in Latin America. *New England Journal of Medicine* 2015; **372**: 113–23.
- 22 Capeding MR, Tran NH, Hadinegoro SRS, *et al.* Clinical efficacy and safety of a novel tetravalent dengue vaccine in healthy children in Asia: a phase 3, randomised, observer-masked, placebo-controlled trial. *The Lancet* 2014; **384**: 1358–65.
